# Supplementary material for: Systematic review of the global epidemiology of viral-induced acute liver failure
Source: PubMed Central journal article supplement — BMJ Open. 2020 Jul 20;10(7):e037473. doi: 10.1136/bmjopen-2020-037473 (PMC7375632; doi:10.1136/bmjopen-2020-037473), 2020-07-20
Supplement: bmjopen-2020-037473.draft_revisions.pdf [file bmjopen-2020-037473.draft_revisions.pdf]

# BMJ Open

BMJ Open is committed to open peer review. As part of this commitment we make the peer review history of every article we publish publicly available.

When an article is published we post the peer reviewers' comments and the authors' responses online. We also post the versions of the paper that were used during peer review. These are the versions that the peer review comments apply to.

The versions of the paper that follow are the versions that were submitted during the peer review process. They are not the versions of record or the final published versions. They should not be cited or distributed as the published version of this manuscript.

BMJ Open is an open access journal and the full, final, typeset and author-corrected version of record of the manuscript is available on our site with no access controls, subscription charges or pay-per-view fees (<http://bmjopen.bmj.com>).

If you have any questions on BMJ Open's open peer review process please email [info.bmjopen@bmj.com](mailto:info.bmjopen@bmj.com)

# BMJ Open

## A Systematic Review of the Global Epidemiology of Viral-Induced Acute Liver Failure

|                               |                                                                                                                                                                                                                                                                                                                                                                                                                                                                                                                                                                                                                                                                                                                                                                                                                                                                                                                                                                                                                                                                                                                                                                                                                                                                                                                                                                                                                                                                                                                                            |
|-------------------------------|--------------------------------------------------------------------------------------------------------------------------------------------------------------------------------------------------------------------------------------------------------------------------------------------------------------------------------------------------------------------------------------------------------------------------------------------------------------------------------------------------------------------------------------------------------------------------------------------------------------------------------------------------------------------------------------------------------------------------------------------------------------------------------------------------------------------------------------------------------------------------------------------------------------------------------------------------------------------------------------------------------------------------------------------------------------------------------------------------------------------------------------------------------------------------------------------------------------------------------------------------------------------------------------------------------------------------------------------------------------------------------------------------------------------------------------------------------------------------------------------------------------------------------------------|
| Journal:                      | <i>BMJ Open</i>                                                                                                                                                                                                                                                                                                                                                                                                                                                                                                                                                                                                                                                                                                                                                                                                                                                                                                                                                                                                                                                                                                                                                                                                                                                                                                                                                                                                                                                                                                                            |
| Manuscript ID                 | bmjopen-2020-037473                                                                                                                                                                                                                                                                                                                                                                                                                                                                                                                                                                                                                                                                                                                                                                                                                                                                                                                                                                                                                                                                                                                                                                                                                                                                                                                                                                                                                                                                                                                        |
| Article Type:                 | Original research                                                                                                                                                                                                                                                                                                                                                                                                                                                                                                                                                                                                                                                                                                                                                                                                                                                                                                                                                                                                                                                                                                                                                                                                                                                                                                                                                                                                                                                                                                                          |
| Date Submitted by the Author: | 07-Feb-2020                                                                                                                                                                                                                                                                                                                                                                                                                                                                                                                                                                                                                                                                                                                                                                                                                                                                                                                                                                                                                                                                                                                                                                                                                                                                                                                                                                                                                                                                                                                                |
| Complete List of Authors:     | Patterson, Jenna; University of Cape Town Faculty of Health Sciences, Vaccines for Africa Initiative, School of Public Health and Family Medicine<br>Hussey, Hannah; University of Cape Town Faculty of Health Sciences, Vaccines for Africa Initiative, School of Public Health & Family Medicine<br>Silal, Sheetal; University of Cape Town, Department of Statistical Sciences; University of Oxford, Nuffield Department of Medicine<br>Goddard, Liz; University of Cape Town, Department of Paediatrics, Red Cross War Memorial Children's Hospital<br>Setshedi, Mashiko; University of Cape Town, Department of Medicine, Division of Gastroenterology, Groote Schuur Hospital<br>Spearman, Wendy ; University of Cape Town, Department of Medicine, Division of Hepatology, Groote Schuur Hospital<br>Hussey, Gregory; University of Cape Town Faculty of Health Sciences, Institute of Infectious Disease and Molecular Medicine, University of Cape Town, South Africa; University of Cape Town Faculty of Health Sciences, Vaccines for Africa Initiative, School of Public Health and Family Medicine<br>Kagina, Benjamin; University of Cape Town Faculty of Health Sciences, Vaccines for Africa Initiative, School of Public Health and Family Medicine<br>Muloiswa, Rudzani; University of Cape Town, 5Department of Pediatrics & Child Health, Red Cross War Memorial Children's Hospital; University of Cape Town Faculty of Health Sciences, Vaccines for Africa Initiative, School of Public Health and Family Medicine |
| Keywords:                     | Epidemiology < INFECTIOUS DISEASES, Hepatology < INTERNAL MEDICINE, VIROLOGY                                                                                                                                                                                                                                                                                                                                                                                                                                                                                                                                                                                                                                                                                                                                                                                                                                                                                                                                                                                                                                                                                                                                                                                                                                                                                                                                                                                                                                                               |
|                               |                                                                                                                                                                                                                                                                                                                                                                                                                                                                                                                                                                                                                                                                                                                                                                                                                                                                                                                                                                                                                                                                                                                                                                                                                                                                                                                                                                                                                                                                                                                                            |

SCHOLARONE™  
Manuscripts

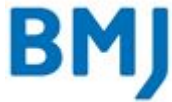

I, the Submitting Author has the right to grant and does grant on behalf of all authors of the Work (as defined in the below author licence), an exclusive licence and/or a non-exclusive licence for contributions from authors who are: i) UK Crown employees; ii) where BMJ has agreed a CC-BY licence shall apply, and/or iii) in accordance with the terms applicable for US Federal Government officers or employees acting as part of their official duties; on a worldwide, perpetual, irrevocable, royalty-free basis to BMJ Publishing Group Ltd ("BMJ") its licensees and where the relevant Journal is co-owned by BMJ to the co-owners of the Journal, to publish the Work in this journal and any other BMJ products and to exploit all rights, as set out in our [licence](#).

The Submitting Author accepts and understands that any supply made under these terms is made by BMJ to the Submitting Author unless you are acting as an employee on behalf of your employer or a postgraduate student of an affiliated institution which is paying any applicable article publishing charge ("APC") for Open Access articles. Where the Submitting Author wishes to make the Work available on an Open Access basis (and intends to pay the relevant APC), the terms of reuse of such Open Access shall be governed by a Creative Commons licence – details of these licences and which [Creative Commons](#) licence will apply to this Work are set out in our licence referred to above.

Other than as permitted in any relevant BMJ Author's Self Archiving Policies, I confirm this Work has not been accepted for publication elsewhere, is not being considered for publication elsewhere and does not duplicate material already published. I confirm all authors consent to publication of this Work and authorise the granting of this licence.

## A Systematic Review of the Global Epidemiology of Viral-Induced Acute Liver Failure

Jenna Patterson<sup>1,2</sup>, Hannah Sophia Hussey<sup>1,2</sup>, Sheetal Silal<sup>3,4</sup>, Liz Goddard<sup>5</sup>, Mashiko Setshedi<sup>6</sup>, C. Wendy Spearman<sup>7</sup>, Gregory D. Hussey<sup>1,8</sup> Benjamin M. Kagina<sup>1,2</sup> and Rudzani Muloiwa<sup>1,5</sup>

<sup>1</sup>Vaccines for Africa Initiative, University of Cape Town, South Africa

<sup>2</sup>School of Public Health & Family Medicine, University of Cape Town, South Africa

<sup>3</sup>Modelling and Simulation Hub, Africa, Department of Statistical Sciences, Faculty of Science, University of Cape Town, South Africa

<sup>4</sup>Nuffield Department of Medicine, Oxford University, Oxford, United Kingdom

<sup>5</sup>Department of Pediatrics & Child Health, Red Cross War Memorial Children's Hospital, University of Cape Town

<sup>6</sup>Department of Medicine, Division of Gastroenterology, Groote Schuur Hospital, University of Cape Town, South Africa

<sup>7</sup>Division of Hepatology, Department of Medicine, Faculty of Health Sciences, University of Cape Town and Groote Schuur Hospital, South Africa

<sup>8</sup>Institute of Infectious Disease and Molecular Medicine, University of Cape Town, South Africa

<sup>5</sup>Department of Pediatrics & Child Health, Red Cross War Memorial Children's Hospital, University of Cape Town

*Corresponding author:* Jenna Patterson

*Corresponding author's ORCID iD:* 0000-0002-3927-037X

*Corresponding author's email address:* pttjen005@myuct.ac.za

*Corresponding author's postal address:* Vaccines for Africa Initiative, Room N2.09A, Werner Beit North, Health Sciences Campus, Anzio Road, Observatory, 7925

*H.S. Hussey email address:* hshussey@gmail.com

*S. Silal email address:* sheetal.silal@uct.ac.za

*E. Goddard email address:* liz.goddard@uct.ac.za

*M. Setshedi email address:* mashiko.setshedi@uct.ac.za

*W. Spearman email address:* wendy.spearman@uct.ac.za

*G.D. Hussey email address:* gregory.hussey@uct.ac.za

*B.M. Kagina email address:* benjamin.kagina@uct.ac.za

*R. Muloiwa email address:* rudzani.muloiwa@uct.ac.za

## **REQUIRED STATEMENTS**

### **Funding statement**

This project was not supported by any funding source.

### **Conflict of interest disclosure**

All authors have no conflicts of interest to declare.

### **Ethics approval statement**

This study did not require ethics approval as it uses publicly available, published data.

### **Patient consent statement**

This study did not require consent from patients as it uses no individual data.

### **Permission to reproduce material from other sources**

This study has cited all references which are published and publicly available.

## **ABBREVIATIONS**

- Acute liver failure (ALF)
- Hepatitis A virus (HAV)
- Hepatitis B virus (HBV)
- Hepatitis C virus (HCV)
- Hepatitis D virus (HDV)
- Hepatitis E virus (HEV)
- Epstein Barr virus (EBV)
- Herpes simplex virus-1 (HSV1)
- Herpes simplex virus-2 (HSV2)
- Varicella-zoster virus (VZV)
- Human parainfluenza viruses (HPIVs)
- Yellow fever virus (YFV)
- Human herpesvirus 6 (HHV-6)
- Cytomegalovirus (CMV)
- Coxsackievirus (CA16)
- Adenovirus (HAdVs)
- Medical Subject Headings (MESH)
- Low- and middle- income countries (LMICs)

## **ABSTRACT**

**Objectives:** The etiology and burden of viral-induced acute liver failure (ALF) remains unclear, globally (1). It is important to understand the epidemiology of viral-induced ALF to plan for clinical case management and case prevention.

**Participants:** This systematic review was conducted to synthesize data on the relative contribution of different viruses to the etiology of viral-induced ALF in attempt to compile evidence that is currently missing in the field. Five electronic databases were searched for relevant literature from 2009 to 2019. Twenty-five eligible studies were included in the results of this review.

**Results:** This systematic review estimated the burden of acute liver failure following infection with HBV, HAV, HBV, HCV, HEV, HSV/HHV, CMV, EBV, and parvo-virus B19. Data were largely missing for ALF following infection with VZV, HPIVs, YFV, CA16 and/or HAdVs. The prevalence of HAV-induced ALF was markedly lower in countries with routine HAV immunization vs no routine HAV immunization. Hepatitis E virus was the most common etiological cause of viral-induced ALF reported in this review. In addition, viral-induced ALF had poor outcomes as indicated by high fatality rates, which appear to increase with poor economic status of the studied countries.

**Conclusions:** Immunization against HAV and HBV should be prioritized in LMICs to prevent high viral-induced ALF mortality rates, especially in settings where resources for managing acute liver failure are lacking. The expanded use of HEV immunization should be explored as HEV was the most common cause of ALF.

**Registration:** PROSPERO registration number CRD42017079730

### **Strengths and limitations**

- Findings are limited by lack of data for some of the viral etiologies of ALF including for VZV, HPIVs, YFV, CA16 and/or HAdVs, which may have led to an underestimation of the global burden of viral-induced ALF
- The diversity of viruses attributable to ALF cases led to low statistical power in meta-analyses conducted.
- The included studies used varying methods of virus detection including serology and molecular tests which further added to the heterogeneity in the results of our review
- Our findings show that HAV, HBV and HEV, viruses with effective vaccines, account for a large proportion of viral-induced ALF etiologies.

- Our findings support that immunization against HAV, HBV should be prioritized, especially in LMICs where resources for managing viral-induced ALF are glaringly lacking.

## MANUSCRIPT

### Background

Acute liver failure (ALF) refers to the development of encephalopathy and synthetic function impairment following acute liver injury in an individual without pre-existing liver disease (2). The presence of encephalopathy is not required to define ALF in paediatrics, but is an essential component of the definition in adults (2). Possible causes of ALF include viral infections, drugs and toxins, pregnancy related liver diseases, vascular causes and/or malignancies. Acute viral hepatitis has been identified as the most common cause of ALF among all ages in Asia and Africa and one of the most common causes of ALF in children in Asia and South America (1, 3). The incidence of viral-induced ALF has substantially declined in Europe following the introduction of universal immunization against the hepatitis B virus (HBV), with only 19% of all ALF cases now attributable to viral infection in the European population (4). The introduction of routine immunization against the hepatitis A virus (HAV) in Argentina has reduced the number of hepatitis A induced ALF cases by more than 25% (4).

Fatality rates associated with ALF vary between 60% and 80%, depending on the disease etiology as well as a patient's access to care (5, 6). Liver transplantation plays a central role in the management of ALF and remains the only definitive treatment for patients who fail to demonstrate spontaneous recovery (7). A large proportion of patients with ALF in both high and low resource settings, however, are deemed to have contraindications to transplantation or deteriorate beyond transplantation before a liver donor is found (8-10).

The burden of viral-induced ALF around the world still remains unclear, with little to no data collected regarding the disease incidence (1). Establishing the etiology of viral-induced ALF is important for early initiation of treatment, determining the prognosis of the liver failure and identifying potential contraindications to liver transplantation. Most importantly, understanding the epidemiology of vaccine-preventable etiologies of ALF should be prioritised in under-resourced regions with limited access to facilities for transplantation. This review aims to synthesize data on the relative contribution of different viruses to the etiology of viral-induced ALF in attempt to compile evidence that is currently missing in the field.

1  
2  
3 50 *Bernal et al. 2010* completed a review of the burden of acute and fulminant liver failure based on  
4  
5 51 literature published between 1997 and 2009. The review became the bases for guidelines for clinical  
6  
7 52 practice (5). In this systematic review, we assess whether data have changed following the Bernal  
8  
9 53 publication, and whether there is evidence to warrant a review of clinical practice.

#### 10 11 54 **Objectives**

- 12 55 • To estimate the prevalence of hepatitis A virus (HAV), hepatitis B virus (HBV), hepatitis C virus  
13 56 (HCV), hepatitis D virus (HDV), hepatitis E virus (HEV), Epstein Barr virus (EBV), herpes simplex  
14 57 virus-1 (HSV1), herpes simplex virus-2 (HSV2), varicella-zoster virus (VZV), parvo-virus B19,  
15 58 human parainfluenza viruses (HPIVs), yellow fever virus (YFV), human herpesvirus 6 (HHV-6),  
16 59 cytomegalovirus (CMV), coxsackievirus (CA16) and/or adenovirus (HAdVs) among patients with  
17 60 ALF.
- 18 61 • To estimate the mortality rate for cases of ALF following infection with HAV, HBV, HCV, HDV,  
19 62 HEV, EBV, HSV1, HSV2, VZV, parvo-virus B19, HPIVs, YFV, HHV-6, CMV, CA16 and/or HAdVs
- 20 63 • To estimate the prevalence and incidence of liver transplantation for cases of ALF following  
21 64 infection with HAV, HBV, HCV, HDV, HEV, EBV, HSV1, HSV2, VZV, parvo-virus B19, HPIVs, YFV,  
22 65 HHV-6, CMV, CA16 and/or HAdVs

#### 23 66 24 67 **Methods**

25 68 This systematic review was registered with PROSPERO (registration number CRD42017079730) and the  
26 69 methods for its conduction have been published (11). The results of the review are reported using the  
27 70 Preferred Reporting Items for Systematic Reviews and Meta-analyses (PRISMA) guidelines checklist  
28 71 (**Appendix 1**).

#### 29 72 30 73 **Study eligibility criteria**

31 74 Published cross-sectional, surveillance and cohort studies reporting the outcomes of interest in patients  
32 75 with ALF following infection with HAV, HBV, HCV, HDV, HEV, EBV, HSV1, HSV2, VZV, parvo-virus B19,  
33 76 HPIVs, YFV, HHV-6, CMV, CA16 and/or HAdVs were eligible for inclusion in this study. Studies were  
34 77 eligible for inclusion if they had clearly stated case definitions of viral-induced ALF and confirmed ALF  
35 78 cases using both clinical and serological, molecular or culture diagnostic methods.

#### 36 79 37 80 **Search strategy**



1  
2  
3 81 A combination of the following search terms (including the use of Medical Subject Headings (MESH))  
4  
5 82 was used and adapted for each of the relevant electronic databases: epidemiology, prevalence,  
6  
7 83 incidence, burden, mortality, morbidity, fulminant hepatic failure, fulminant liver failure, acute hepatic  
8  
9 84 failure, acute liver failure, Hepatitis A virus (HAV), hepatitis B virus (HBV), hepatitis C virus (HCV),  
10  
11 85 hepatitis D virus (HDV), hepatitis E virus (HEV), Epstein Barr virus (EBV), herpes simplex virus-1 (HSV1),  
12  
13 86 herpes simplex virus-2 (HSV2), varicella-zoster virus (VZV), parvo-virus B19, human parainfluenza viruses  
14  
15 87 (HPIVs), yellow fever virus (YFV), human herpesvirus 6 (HHV-6), cytomegalovirus (CMV), coxsackie virus  
16  
17 88 and adenovirus.

18  
19 90 The following electronic databases were searched for relevant literature published from 2009 to 2019:  
20  
21 91 EBSCOhost, PubMed, ScienceDirect, Scopus and Web of Science. The search was run on 9 April 2019 and  
22  
23 92 updated via PubMed on 30 September 2019 with no new eligible studies to include.

24 93

#### 25 94 **Data extraction**

26  
27 95 Study characteristics and outcomes of interests were extracted from the included studies on a pre-  
28  
29 96 designed data extraction form by two independent reviewers (JP and HH). Prior to use by the two  
30  
31 97 reviewers, the reliability of the extraction form was assessed by piloting 10 randomly selected articles  
32  
33 98 that met the inclusion criteria. The study team resolved any disagreements in data extraction through  
34  
35 99 consensus in consultation with RM. In cases where studies were in German, HH provided translation. In  
36  
37 100 cases where studies were not available in English or German, google translate was used to translate the  
38  
39 101 article to English (12).

40 102

#### 41 103 **Data synthesis and analysis**

42 104 A random-effects model was fitted to the study data as it included data taken from a series of  
43  
44 105 independently performed studies in different populations. We assessed heterogeneity by calculating  $I^2$   
45  
46 106 statistics (threshold  $I^2 > 40\%$ ). The values of  $I^2$  were categorized for heterogeneity as follows: “not  
47  
48 107 important” (0 to 40%), “moderate” (41 to 60%) and “considerable” (61 to 80%) and “substantial” (81 to  
49  
50 108 100%). Where “not important” or “moderate” heterogeneity existed between studies ( $I^2 \leq 40\%$ ), pooled  
51  
52 109 outcome measures were reported with 95% confidence intervals for each respective outcome. Where  
53  
54 110 “considerable” or “substantial” heterogeneity exists between studies ( $I^2 > 40\%$ ), forest plots and  
55  
56 111 prevalence ranges calculated using the random-effects model were used to narratively describe each  
57  
58 112 outcome.

### 113 **Risk of bias assessment**

114 Each included study was assessed for risk of bias and quality using the Hoy *et al.*, 2012 tool for  
115 observational studies (13, 14). Studies were judged as having 'low risk' if scored 8-10, 'moderate risk' if  
116 scored 5-7 and 'high risk' if scored 0-5. All risk of bias judgements were made by both JP and HH. In case  
117 of disagreement in risk of bias and quality assessment, a final decision was made through consensus in  
118 consultation with RM.

119

## 120 **Results**

### 121 **Patient and public involvement**

122 This review was developed as part of an ongoing project by the research team that aims to generate  
123 evidence to facilitate evidence-based decision-making of introducing routine hepatitis A vaccination in  
124 South Africa. The findings of this review contribute to the knowledge base that aims to enhance global  
125 vaccination strategies against viral-associated ALF. As this is a systematic review, no patient involvement  
126 was required; however, it is hoped that the findings of this review will help to highlight the burden that  
127 ALF places on populations without routine vaccination.

128

### 129 **Included studies**

130 The initial database searches yielded 6,952 records, from which 3,545 duplicates were removed. A  
131 further 3,263 were excluded following the screening of titles and abstracts (**Figure 1**). The full text of the  
132 remaining 144 records were screened by JP and HH, from which 25 studies were deemed to meet the  
133 final inclusion criteria. Twenty-four (96%) of the included studies were cohort studies. As detailed in  
134 **Table 1**, the included studies were published between 2009 and 2017. Included studies were conducted  
135 globally, with 7 studies and 3 studies conducted in India and Pakistan, respectively. The populations  
136 represented by the included studies spanned all age groups and included participants primarily from  
137 hospital settings. As the data in this review was sourced from a variety of countries, age groups and  
138 settings, the heterogeneity was considerable and/or substantial for all results. Thus, we narratively and  
139 graphically reported estimates of average prevalence rates and the spreads of prevalence.

140

### 141 **Vaccine-preventable viral-induced ALF**

142 We narratively report the prevalence of HAV- and HBV-induced ALF by country immunization status. The  
143 point prevalence of HAV-induced ALF in countries with no routine HAV immunization at the time of data  
144 collection ranged from 2% to 81% with an average of 27% (95% CI 13, 43), while the prevalence in

1  
2  
3 145 countries with routine HAV immunization at the time of data collection ranged from 1% to 2% with an  
4 average of 2% (95% CI 1, 3) (**Figure 2**). In Argentina, the prevalence of HAV-induced ALF prior to routine  
5 146 immunization was approximately 50% (95% CI 45, 55), compared to approximately 1% (95% CI 0, 5) after  
6 147 immunization was introduced. The point prevalence of HBV-induced ALF in countries without universal  
7 148 HBV immunization at the time of data collection ranged from 16% to 27% with an average of 22% (95%  
8 149 CI 16, 30) (**Figure 3**). The point prevalence of HBV-induced ALF in countries with universal HBV  
9 150 immunization at the time of data collection ranged from 0% to 83% with an average of 19% (95% CI = 7,  
10 151 36).  
11 152  
12 153

### 18 154 **ALF attributable to non-vaccine-preventable viral infections**

19 155 The point prevalence of HCV-induced ALF ranged from 2% to 25% with an average of 9% (95% CI = 1, 21)  
20 156 (**Supplementary Figure 1**). The point prevalence of HEV-induced ALF ranged from 3% to 70% with an  
21 157 average of 32% (95% CI 24, 41) (**Supplementary Figure 2**). The point prevalence of HDV-, HHV/HSV-,  
22 158 CMV-, and EBV-induced ALF were estimated to have averages of 4% (95% CI 0, 13), 6% (95% CI 1, 12),  
23 159 13% (95% CI 1, 35) and 6% (95% CI 0, 24), 10% (95% CI 2, 22), 2% (95% CI 0, 5), and 1% (95% CI 0, 5),  
24 160 respectively (**Supplementary Figure 3**). Data was not available to estimate the burden of ALF following  
25 161 infection with HDV, VZV, HPIVS, YFV, CA16 and/or HAdVs as outlined per the published protocol (11).  
26 162

### 33 163 **Outcomes of viral-induced ALF**

34 164 The narratively reported outcomes of viral-induced ALF were found to be severe. The mortality rates  
35 165 associated with viral-induced ALF in lower-middle income countries ranged from 18% to 91% with an  
36 166 average of 50% (95% CI 36, 64) (**Figure 4A**). The mortality rates associated with viral-induced ALF in  
37 167 upper-middle income countries ranged 3% to 45% with an average of 26% (95% CI 1, 63) (**Figure 4A**).  
38 168 The mortality rates associated with viral-induced ALF in high income countries ranged from 12% to 40%  
39 169 with an average of 29% (95% CI 17, 43) (**Figure 4A**). The rate of encephalopathy associated with viral-  
40 170 induced ALF cases in children ranged from 69% to 100% with an average of 89% (95% CI 79, 97) (**Figure**  
41 171 **4B**). The need for liver transplantation with viral-associated ALF ranged from 4% to 62% with an average  
42 172 of 25% (95% CI 6, 53) (**Figure 4B**). The need for renal transplant in viral-associated ALF cases ranged  
43 173 from 4% to 34% with an average of 18% (95% CI 2, 43) (**Figure 4B**).  
44 174

### 53 175 **Methodological quality**

1  
2  
3 176 Risk of bias scores were assigned by two reviewers (JP and HH) and are described in **Supplementary**  
4  
5 177 **Table 1**. Overall, a majority of the included studies were judged as having ‘low risk’ of bias. Only one  
6  
7 178 included study was judged as having ‘moderate risk’ of bias due to lack of clarity around the  
8  
9 179 representativeness of the study population to the national population, methods of participant selection  
10  
11 180 and methods employed to reduce the likelihood of non-response.  
12

13 181

## 14 182 **Discussion**

15 183 This systematic review estimated the burden of ALF following infection with HAV, HBV, HCV, HEV,  
16  
17 184 HSV/HHV, CMV, EBV, and parvo-virus B19. The prevalence of HAV-induced ALF is markedly lower in  
18  
19 185 countries with routine HAV immunization while HEV was the most common etiological cause of viral-  
20  
21 186 induced ALF reported in this review. In addition, viral-induced ALF had poor outcomes as indicated by  
22  
23 187 high fatality rates, which seem to increase with poor economic status of the studied countries.  
24

25 188

26 189 The estimated prevalence of HAV-induced ALF in countries with routine HAV immunization was  
27  
28 190 markedly lower than the estimated prevalence in countries without routine HAV immunization. When  
29  
30 191 looking at countries with data before and after the introduction of routine HAV immunization, the  
31  
32 192 reduction of HAV-induced ALF due to vaccination is further highlighted. The average prevalence of HBV-  
33  
34 193 induced ALF was the same in settings with or without universal HBV immunization. Countries without  
35  
36 194 universal HBV immunization programs are likely to have weak healthcare systems; thus, the reported  
37  
38 195 prevalence of HBV-induced ALF is assumed to be an underestimate of the true burden in these  
39  
40 196 populations due to weak routine testing and reporting systems. Currently, there is one HEV vaccine  
41  
42 197 (Hecolin) licensed in China that has shown promise with a high degree of efficacy in preventing HEV  
43  
44 198 genotype IV infection in healthy individuals 16 to 65 years (15). Further exploration of the efficacy of this  
45  
46 199 vaccine for prevention of infection with genotypes I and II in different populations should to explore it’s  
47  
48 200 application in different countries and HEV endemicity settings (16).

49 201

50 202 This review estimated the mortality rate for viral-induced ALF to be approximately 50% in low- and  
51  
52 203 middle- income countries (LMICs) and less than 30% in upper-middle- and high-income countries.  
53  
54 204 Previous studies have estimated that mortality rates associated with ALF vary between 60% and 80%,  
55  
56 205 depending on the disease etiology as well as a patient’s access to care. Our review shows that although  
57  
58 206 viral-induced ALF still carries a significant mortality, though possibly lower than that reported for other  
59  
60 207 ALF etiologies (5, 6). Mortality data largely comes from hospitals with the capacity to diagnose viral-

7

1  
2  
3 208 induced ALF, thus deaths outside of the hospital system or ALF deaths without virological testing may  
4  
5 209 not be captured in these mortality estimates. Liver transplantation is required by approximately 25% of  
6  
7 210 viral-induced ALF cases and approximately 18% of viral-induced ALF cases required renal  
8  
9 211 transplantation, globally. In addition to general lack of resources for transplantation, a significant  
10  
11 212 proportion of potential candidates have contraindications to transplant related to poor socioeconomic  
12  
13 213 status in LMICs. The transplant data included in this review may only reflect successful and unsuccessful  
14  
15 214 transplants, not those that were needed but not carried out due to resource constraints or  
16  
17 215 contraindications.  
18

19  
20 216  
21 217 This review is limited by lack of data for some of the viral etiologies of ALF including for VZV, HPIVs, YFV,  
22  
23 218 CA16 and/or HAdVs, which may have led to an underestimation of the global burden of viral-induced  
24  
25 219 ALF. Additionally, we believe that our findings underestimate the global burden of viral-induced ALF as  
26  
27 220 some important causes of ALF (e.g. HSV/HHV) are believed to be underrecognized as they require PCR  
28  
29 221 testing for diagnosis. The included studies also used varying methods of virus detection including  
30  
31 222 serology and molecular tests which further added to the heterogeneity in the results of our review. This  
32  
33 223 is a well-recognized limitation in studies of ALF where diagnostics are often limited by cost in under-  
34  
35 224 resourced regions where viral causes of ALF are more prevalent. The limited availability of data hindered  
36  
37 225 most of the planned sub-group analyses outlined in the study protocol. Where data were available, high  
38  
39 226 heterogeneity of the data led to planned meta-analyses and meta-regression analyses not being  
40  
41 227 possible. Lastly, the diversity of viruses attributable to ALF cases led to low statistical power in meta-  
42  
43 228 analyses conducted.  
44

45 229  
46 230 Future research should assess the burden of viral-induced ALF following infection with HDV, VZV, HPIVs,  
47  
48 231 YFV, CA16 and HAdVs. Collectively, high-quality data on all viral etiologies of ALF would allow for better  
49  
50 232 pooling of results. The review team encourages future studies to incorporate health economic estimates  
51  
52 233 and mathematical modelling where data permits to assist health policy decision-makers to better design  
53  
54 234 strategies for the prevention and management of viral-induced ALF. Epidemiological-economic  
55  
56 235 modelling of immunization against HAV, HBV and HEV may well show that introduction of vaccination  
57  
58 236 could lead to future cost savings in the long run due to prevented medical care and liver failure.  
59

60 237

## 61 238 **Conclusions**

1  
2  
3 239 We successfully addressed the aim of the study although data on VZV, HPIVs, YFV, CA16 and/or HAdVs  
4  
5 240 were missing. Notwithstanding the noted limitations, it is clear that HAV, HBV and HEV – vaccine-  
6  
7 241 preventable ALF etiologies – account for a large proportion of ALF (approximately 21%, 20%, 32% of  
8  
9 242 viral-induced ALF cases, respectively). The burden of ALF that is associated with vaccine-preventable ALF  
10  
11 243 etiologies should be used in conjunction with other available key evidence to inform practice and  
12  
13 244 policies on immunization, particularly in LMICs. A majority of LMICs have established universal  
14  
15 245 vaccination against HBV. The World Health Organization has recently recommended the introduction of  
16  
17 246 an HBV birth dose which is aimed at elimination of the virus and, if successful, will subsequently reduce  
18  
19 247 the burden of HBV-induced ALF. Routine HAV immunization in LMICs, however, are lacking. More data is  
20  
21 248 urgently needed to guide routine use of the vaccine in prevention of morbidity and mortality caused by  
22  
23 249 the virus. Lastly, further applicability of HEV vaccines should be explored, especially in LMICs where  
24  
25 250 resources for managing viral-induced ALF are glaringly lacking.  
26  
27  
28  
29  
30  
31  
32  
33  
34  
35  
36  
37  
38  
39  
40  
41  
42  
43  
44  
45  
46  
47  
48  
49  
50  
51  
52  
53  
54  
55  
56  
57  
58  
59  
60

**Contributors**

JP, GDH, BK and RM conceived this study. JP implemented the review under the supervision of RM. JP and HSH performed the study search, screening and extraction of data under the guidance of RM. GDH and BK provided methodological expertise for this review. SS, LG, WS, and provided content expertise for this review and all authors will provided comments on the final manuscript before publication. JP is the guarantor of this review.

**Funding**

This research received no specific grant from any funding agency in the public, commercial or not-for-profit sectors. The Vaccines for Africa Initiative (VACFA) has funded the costs associated with the research and dissemination of the results, including publications.

**Competing interests**

None declared.

**Data availability**

No additional data available.

**Patient consent for publication**

Not required.

## REFERENCES

1. European Association for the Study of the Liver. Electronic address eee, Clinical practice guidelines p, Wendon J, Panel m, Cordoba J, Dhawan A, et al. EASL Clinical Practical Guidelines on the management of acute (fulminant) liver failure. *J Hepatol.* 2017;66(5):1047-81.
2. Lee WM, Stravitz RT, Larson AM. Introduction to the revised American Association for the Study of Liver Diseases Position Paper on acute liver failure 2011. *Hepatology.* 2012;55(3):965-7.
3. Morabito V, Adebayo D. Fulminant Hepatitis: Definitions, Causes and Management. *Health.* 2014;06(10):1038-48.
4. Cervio G, Trentadue J, D'Agostino D, Luque C, Giorgi M, Armoni J, et al. Decline in HAV-associated fulminant hepatic failure and liver transplant in children in Argentina after the introduction of a universal hepatitis A vaccination program. *Hepat Med.* 2011;3:99-106.
5. Bernal W, Auzinger G, Dhawan A, Wendon J. Acute liver failure. *Lancet.* 2010;376(Seminar):190-201.
6. Wlodzimirow KA, Eslami S, Abu-Hanna A, Nieuwoudt M, Chamuleau RA. Systematic review: acute liver failure - one disease, more than 40 definitions. *Aliment Pharmacol Ther.* 2012;35(11):1245-56.
7. Spearman CW, McCulloch M, Millar AJ, Burger H, Numanoglu A, Goddard E, et al. Liver transplantation at Red Cross War Memorial Children's Hospital. *South African medical journal = Suid-Afrikaanse tydskrif vir geneeskunde.* 2006;96(9 Pt 2):960-3.
8. O'Grady JG. Acute liver failure. *Postgrad Med J.* 2005;81(953):148-54.
9. O'Grady J. Liver transplantation for acute liver failure. *Best Pract Res Clin Gastroenterol.* 2012;26(1):27-33.
10. Patterson J, Hussey HS, Abdullahi LH, Silal S, Goddard L, Setshedi M, et al. The global epidemiology of viral-induced acute liver failure: a systematic review protocol. *BMJ Open.* 2019.
11. Balk E, Ching M, Chen M, Trikalinos T, L KWC. Assessing the Accuracy of Google Translate to Allow Data Extraction From Trials Published in Non-English Languages. Rockville, USA: Agency for Healthcare Research and Quality; 2013 Jan 2013. Contract No.: EHC145-EF.
12. Hoy D, Brooks P, Woolf A, Blyth F, March L, Bain C. Assessing risk of bias in prevalence studies: Modification of an existing tool and evidence of interrater agreement. *Journal of Clinical Epidemiology.* 2012;65:934-9.
13. Werfalli M, Musekiwa A, Engel ME, Ross I, Kengne AP, Levitt NS. The prevalence of type 2 diabetes mellitus among older people in Africa: a systematic review study protocol. *BMJ Open.* 2014.
14. Alam S, Azam G, Mustafa G, Azad AK, Haque I, Gani S, et al. Natural course of fulminant hepatic failure: the scenario in Bangladesh and the differences from the west. *Saudi J Gastroenterol.* 2009;15(4):229-33.
15. Asim MS, R.; Gupta, R. K.; Kar, P. Clinical & molecular characterization of human TT virus in different liver diseases. *Indian Journal of Medical Research.* 131(4):545-54.
16. Bechmann LP, Manka P, Best J, Saner FH, Paul A, Canbay A, et al. Drug-induced liver injury as predominant cause of acute liver failure in a monocenter study. *Deutsche Medizinische Wochenschrift.* 2014;139(17):878-82.
17. Bhatia V, Dhawan A, Arora NK, Mathur P, Das MK, Irshad M. Urinary potassium loss in children with acute liver failure and acute viral hepatitis. *J Pediatr Gastroenterol Nutr.* 2013;57(1):102-8.
18. Borkakoti JH, R. K.; Mohammad, A.; Kumar, A.; Kar, P. Does high viral load of hepatitis E virus influence the severity and prognosis of acute liver failure during pregnancy? *Journal of Medical Virology.* 2013;85(4):620-6.
19. Bravo LC, Gregorio GV, Shafi F, Bock HL, Boudville I, Liu Y, et al. Etiology, incidence and outcomes of acute hepatic failure in 0-18 year old Filipino children. *Southeast Asian J Trop Med Public Health.* 2012;43(3):764-72.
20. Das AK, Begum T, Kar P, Dutta A. Profile of Acute Liver Failure from North-east India and Its Differences from other Parts of the Country. *Euroasian J Hepatogastroenterol.* 2016;6(2):111-5.
21. Gupta P, Mittal M, Bhat NK, Agarwal RK, Gupta P, Mittal G. A hospital based retrospective study on hepatotropic viruses as a cause of acute viral hepatitis in children in Uttarakhand, India. *Indian Journal of Community Health.* 2015;27(4):451-5.
22. Ho CM, Lee CH, Wang JY, Lee PH, Lai HS, Hu RH. Nationwide longitudinal analysis of acute liver failure in taiwan. *Medicine (Baltimore).* 2014;93(4):e35.
23. Latif N, Mehmood K. Risk factors for fulminant hepatic failure and their relation with outcome in children. *J Pak Med Assoc.* 2010;60(3):175-8.
24. Mamun Al M, Rahman S, Khan M, Karim F. HEV infection as an aetiologic factor for acute hepatitis: experience from a tertiary hospital in Bangladesh. *J Health Popul Nutr.* 2009;27(1):14-9.
25. Manka P, Bechmann LP, Coombes JD, Thodou V, Schlattjan M, Kahraman A, et al. Hepatitis E Virus Infection as a Possible Cause of Acute Liver Failure in Europe. *Clin Gastroenterol Hepatol.* 2015;13(10):1836-42.e2; quiz e157-8.
26. Mendizabal MM, S.; Videla, M. G.; Anders, M.; Zerega, A.; Balderramo, D. C.; Chan, D.; Barrabino, M.; Gil, O.; Mastai, R.; Yantorno, S.; Gadano, A.; Silva, M. O. Changing etiologies and outcomes of acute liver failure: Perspectives from 6 transplant centers in Argentina. *Liver Transplantation.* 2014;20(4):483-9.
27. Mishra SB, J.; Kumar, S.; Kar, P. Role of HEV antigen detection in HEV-related acute viral hepatitis and acute liver failure. *Journal of Medical Virology.* 2016;88(12):2179-85.



- 1
- 2
- 3
- 4 28. Mumtaz K, Azam Z, Hamid S, Abid S, Memon S, Ali Shah H, et al. Role of N-acetylcysteine in adults with non-
- 5 acetaminophen-induced acute liver failure in a center without the facility of liver transplantation. *Hepatology*
- 6 *International*. 2009;3(4):563-70.
- 7 29. Pandit A, Mathew LG, Bavdekar A, Mehta S, Ramakrishnan G, Datta S, et al. Hepatotropic viruses as etiological agents
- 8 of acute liver failure and related-outcomes among children in India: a retrospective hospital-based study. *BMC Res*
- 9 *Notes*. 2015;8:381.
- 10 30. Poovorawan Y, Chongsrisawat V, Shafi F, Boudville I, Liu Y, Hutagalung Y, et al. Acute hepatic failure among
- 11 hospitalized Thai children. *Southeast Asian J Trop Med Public Health*. 2013;44(1):50-3.
- 12 31. Schwarz KBO, Dominic Dell; Lobritto, Steven J.; Lopez, M. James; Rodriguez-Baez, Norberto; Yazigi, Nada A.; Belle,
- 13 Steven H.; Zhang, Song; Squires, Robert H.; for the Pediatric Acute Liver Failure Study, Group. Analysis of Viral Testing
- 14 in Nonacetaminophen Pediatric Acute Liver Failure. *Journal of Pediatric Gastroenterology & Nutrition*.
- 15 2014;59(5):616-23.
- 16 32. Shalimar, Kedia S, Gunjan D, Sonika U, Mahapatra SJ, Nayak B, et al. Acute Liver Failure Due to Hepatitis E Virus
- 17 Infection Is Associated with Better Survival than Other Etiologies in Indian Patients. *Dig Dis Sci*. 2017;62(4):1058-66.
- 18 33. Silverio CE, Smithen-Romany CY, Hondal NI, Diaz HO, Castellanos MI, Sosa O. Acute liver failure in Cuban children.
- 19 *MEDICC Rev*. 2015;17(1):48-54.
- 20 34. Somasekar SL, D.; Rule, J.; Naccache, S. N.; Stone, M.; Busch, M. P.; S.; ers, C.; Lee, W. M.; Chiu, C. Y. Viral Surveillance
- 21 in Serum Samples from Patients with Acute Liver Failure by Metagenomic Next-Generation Sequencing. *Clinical*
- 22 *Infectious Diseases*. 2017;65(9):1477-85.
- 23 35. Uddin Jamro BMC, S.; Mal Makheja, P.; Ahmed Soomro, A. Etiology, outcome and risk factors for fulminant hepatic
- 24 failure in children at a tertiary care hospital, Sukkur, Pakistan. *Rawal Medical Journal*. 2013;38(3):219-22.
- 25 36. Tsunoda T, Inui A, Iwasawa K, Oikawa M, Sogo T, Komatsu H, et al. Acute liver dysfunction not resulting from hepatitis
- 26 virus in immunocompetent children. *Pediatr Int*. 2017;59(5):551-6.
- 27 37. Zhao P, Wang CY, Liu WW, Wang X, Yu LM, Sun YR. Acute liver failure in Chinese children: a multicenter investigation.
- 28 *Hepatobiliary Pancreat Dis Int*. 2014;13(3):276-80.
- 29 38. Li SW, Zhao Q, Wu T, Chen S, Zhang J, Xia NS. The development of a recombinant hepatitis E vaccine HEV 239. *Hum*
- 30 *Vaccin Immunother*. 2015;11(4):908-14.
- 31 39. Wu X, Chen P, Lin H, Hao X, Liang Z. Hepatitis E virus: Current epidemiology and vaccine. *Human Vaccines and*
- 32 *Immunotherapeutics*. 2016;12(10):2603-10.
- 33
- 34
- 35
- 36
- 37
- 38
- 39
- 40
- 41
- 42
- 43
- 44
- 45
- 46
- 47
- 48
- 49
- 50
- 51
- 52
- 53
- 54
- 55
- 56
- 57
- 58
- 59
- 60

## FIGURE LEGENDS

Figure 1  
PRISMA Flow Diagram describing selection of studies.

Figure 2  
Abbreviations: HAV = hepatitis A virus, ALF = acute liver failure, CI = confidence interval, I<sup>2</sup> = heterogeneity statistic

Figure 3  
Abbreviations: HBV = hepatitis B virus, ALF = acute liver failure, CI = confidence interval, I<sup>2</sup> = heterogeneity statistic

Figure 4  
Abbreviations: ALF = acute liver failure, CI = confidence interval, I<sup>2</sup>=heterogeneity statistic, NA = not applicable

## TABLES

Table 1: Characteristics of included studies

| Study                      | Study Design         | Aim                                                                             | Country    | Income Level | Start of Data Collection | End of Data Collection | ALF Case Definition                                                                                                                                                                        |
|----------------------------|----------------------|---------------------------------------------------------------------------------|------------|--------------|--------------------------|------------------------|--------------------------------------------------------------------------------------------------------------------------------------------------------------------------------------------|
| Alam et al., 2009 (14)     | Prospective cohort   | To evaluate the etiology, complications, and outcome of FHF                     | Bangladesh | Lower-middle | 3-Nov                    | 8-May                  | Occurrence of hepatic encephalopathy within 8 weeks of onset of jaundice in patients with no previous liver disease and the presence of coagulopathy as proved by a PT > 15 s or INR > 1.5 |
| Asim et al., 2009 (15)     | Cross-sectional      | To analyze serum samples from patients with ALF for hepatitis A-G viral markers | India      | Lower-middle | 1-Jun                    | 4-May                  | Patient become deeply jaundiced and went into hepatic encephalopathy within 8 weeks of onset of the disease, with no past history of chronic hepatitis                                     |
| Bechmann et al., 2014 (16) | Retrospective cohort | To identify currently predominant etiologies of ALF at a transplant center      | Germany    | High         | 1-Jan                    | 12-Feb                 | <i>Acute Liver Failure Study Group Germany</i> case definition: INR > 1.5 and encephalopathy of any grade. Pre-existing liver disease and systemic cause of liver failure were excluded    |

|    |                          |               |                      |             |        |        |        |                                        |
|----|--------------------------|---------------|----------------------|-------------|--------|--------|--------|----------------------------------------|
| 1  |                          |               |                      |             |        |        |        |                                        |
| 2  |                          |               |                      |             |        |        |        |                                        |
| 3  |                          |               |                      |             |        |        |        |                                        |
| 4  |                          |               | To analyze clinical  |             |        |        |        |                                        |
| 5  |                          |               | features, liver      |             |        |        |        | Development of hepatic                 |
| 6  |                          |               | function tests,      |             |        |        |        | encephalopathy within 26               |
| 7  | Bhatia et al., 2013 (17) | Prospective   | hepatitis viral      | India       | Lower- | Jun-99 | 1-Jan  | weeks of the first symptoms            |
| 8  |                          | cohort        | markers and          |             | middle |        |        | of acute hepatitis-like illness        |
| 9  |                          |               | clinical outcomes    |             |        |        |        | without any history of                 |
| 10 |                          |               | in patients with     |             |        |        |        | underlying liver disease               |
| 11 |                          |               | ALF                  |             |        |        |        |                                        |
| 12 |                          |               |                      |             |        |        |        |                                        |
| 13 |                          |               | To determine the     |             |        |        |        | Development of                         |
| 14 |                          |               | viral load of HEV    |             |        |        |        | encephalopathy within 8                |
| 15 |                          |               | and its association  |             |        |        |        | weeks of the onset of                  |
| 16 |                          |               | with the disease     |             |        |        |        | jaundice without any past              |
| 17 | Borkakoti et al., 2013   | Prospective   | severity in patients | India       | Lower- | 6-Jan  | 11-Dec | history of chronic liver               |
| 18 | (18)                     | cohort        | with ALF in          |             | middle |        |        | disease; diagnosed as a self-          |
| 19 |                          |               | comparison with      |             |        |        |        | limiting disease and a serum           |
| 20 |                          |               | patients with ALF    |             |        |        |        | aspartate aminotransferase             |
| 21 |                          |               | due to other         |             |        |        |        | elevation of at least fivefold or      |
| 22 |                          |               | hepatides            |             |        |        |        | clinical jaundice or both              |
| 23 |                          |               |                      |             |        |        |        |                                        |
| 24 |                          |               |                      |             |        |        |        |                                        |
| 25 |                          |               | To investigate the   |             |        |        |        | Onset of coagulopathy and/or           |
| 26 |                          |               | etiology, outcomes   |             |        |        |        | encephalopathy $\leq 4$ weeks          |
| 27 |                          |               | and incidence of     |             |        |        |        | after the onset of symptoms,           |
| 28 | Bravo et al., 2012 (19)  | Prospective & | AHF among            | Philippines | Lower- | Jan-00 | 6-Dec  | a prothrombin time > 2, an             |
| 29 |                          | retrospective | children 0-18        |             | middle |        |        | increased bilirubin and                |
| 30 |                          | cohort        | years old            |             |        |        |        | evidence for liver failure             |
| 31 |                          |               |                      |             |        |        |        | complicated by                         |
| 32 |                          |               |                      |             |        |        |        | encephalopathy                         |
| 33 |                          |               |                      |             |        |        |        |                                        |
| 34 |                          |               |                      |             |        |        |        | <i>Mieli-Vergani</i> case definition:  |
| 35 |                          |               |                      |             |        |        |        | a multisystem disorder in              |
| 36 |                          |               |                      |             |        |        |        | which severe impairment of             |
| 37 |                          |               | To investigate the   |             |        |        |        | liver function, with or without        |
| 38 |                          |               | impact of HAV UI     |             |        |        |        | encephalopathy, occurs in              |
| 39 | Cervio et al., 2011 (4)  | Retrospective | on the trends in     | Argentina   | High   | Mar-93 | 5-Jul  | association with                       |
| 40 |                          | cohort        | the occurrence of    |             |        |        |        | hepatocellular necrosis in a           |
| 41 |                          |               | FHF in children      |             |        |        |        | patient with or without                |
| 42 |                          |               |                      |             |        |        |        | recognized underlying chronic          |
| 43 |                          |               |                      |             |        |        |        | liver disease ( <b>Cheeseman &amp;</b> |
| 44 |                          |               |                      |             |        |        |        | <b>Mieli-Vergani, 2004</b> )           |
| 45 |                          |               |                      |             |        |        |        |                                        |
| 46 |                          |               |                      |             |        |        |        |                                        |
| 47 |                          |               | To determine the     |             |        |        |        | History of development of              |
| 48 | Das et al., 2016 (20)    | Prospective   | profile of ALF       | India       | Lower- | 7-Jan  | 15-Dec | encephalopathy within 8                |
| 49 |                          | cohort        | etiologies           |             | middle |        |        | weeks of disease onset                 |
| 50 |                          |               |                      |             |        |        |        |                                        |
| 51 |                          |               | To determine the     |             |        |        |        | Elevated ALT levels or AST of          |
| 52 |                          |               | profile of Hepatitis |             |        |        |        | at least five-fold with clinical       |
| 53 | Gupta et al., 2015 (21)  | Retrospective | A, B, C and E as a   | India       | Lower- | 11-Jan | 14-Dec | jaundice and without evidence          |
| 54 |                          | cohort        | cause of AHF in      |             | middle |        |        | of chronic liver disease.              |
| 55 |                          |               | children in a        |             |        |        |        | Patients who had INR > 1.5             |
| 56 |                          |               |                      |             |        |        |        |                                        |
| 57 |                          |               |                      |             |        |        |        |                                        |
| 58 |                          |               |                      |             |        |        |        |                                        |
| 59 |                          |               |                      |             |        |        |        |                                        |
| 60 |                          |               |                      |             |        |        |        |                                        |

|                              |                      |                                                                                          |            |              |        |        |                                                                                                                                                                                                                        |
|------------------------------|----------------------|------------------------------------------------------------------------------------------|------------|--------------|--------|--------|------------------------------------------------------------------------------------------------------------------------------------------------------------------------------------------------------------------------|
|                              |                      | tertiary care hospital                                                                   |            |              |        |        | with encephalopathy or INR > 2 without encephalopathy                                                                                                                                                                  |
| Ho et al., 2014 (22)         | Prospective cohort   | To investigate the incidence, etiology, outcomes, and prognostic factors of ALF          | Taiwan     | High income  | 5-Jan  | 7-Sep  | International Classification of Diseases, Ninth Revision, Clinical Modification (ICD-9-CM) code 570.0                                                                                                                  |
| Latif et al., 2010 (23)      | Prospective cohort   | To identify the risk factors for FHF and their relationship with the outcome in children | Pakistan   | Lower-middle | 6-Sep  | 7-Feb  | Development of encephalopathy within 8 weeks of the onset of jaundice having evidence of coagulopathy i.e. PT deranges > 4 s of control and deranged liver function i.e. TSB > 1.5 mg/dl, AT > 40 IU/L                 |
| Mamun et al., 2009 (24)      | Retrospective cohort | To assess the burden of HEV as a cause of ALF                                            | Bangladesh | Lower-middle | 4-Jun  | 6-Dec  | Previously healthy patients who presented with severe impairment of hepato-cellular function, i.e. encephalopathy, coagulopathy, and jaundice, within six months of onset of symptoms                                  |
| Manka et al., 2015 (25)      | Retrospective cohort | To investigate the causes of previously diagnosed indeterminate cases ALF                | Germany    | High         | 6-Nov  | 13-Dec | Significant liver dysfunction with pathologically increased laboratory parameters [AST, ALT, AP], an existing coagulopathy in terms of an INR > 1.5, and with the concomitant presence of any degree of encephalopathy |
| Mendizabal et al., 2014 (26) | Retrospective cohort | To determine the causes and short-term outcomes of ALF                                   | Argentina  | High         | 5-Jun  | 11-Dec | Presence of coagulopathy [INR > 1.5 or prothrombin index < 50%] and any grade of HE within 26 weeks of the first symptoms without a known underlying liver disease                                                     |
| Mishra et al., 2016 (27)     | Retrospective cohort | To assess the relative efficacy of HEV antigen detection by                              | India      | Lower-middle | 13-Nov | 15-Jan | Any evidence of coagulation abnormality, generally INR >1.5 and any degree of mental alteration (encephalopathy) without pre-                                                                                          |

|                              |                                                   |                                                                                                                                |               |              |        |        |                                                                                                                                                                                                                                                                                                                                   |
|------------------------------|---------------------------------------------------|--------------------------------------------------------------------------------------------------------------------------------|---------------|--------------|--------|--------|-----------------------------------------------------------------------------------------------------------------------------------------------------------------------------------------------------------------------------------------------------------------------------------------------------------------------------------|
|                              |                                                   | ELISA in patients with ALF                                                                                                     |               |              |        |        | existing cirrhosis and with an illness of < 4 weeks duration                                                                                                                                                                                                                                                                      |
| Mumtaz et al., 2009 (28)     | Prospective cohort compared to historical control | To assess the etiology, prothrombin time (PT), alanine aminotransferase, creatinine, albumin for non-acetaminophen-induced ALF | Pakistan      | Lower middle | Jan-00 | 7-Mar  | Rapid development of acute liver injury with impaired synthetic function and encephalopathy in a person who previously had a normal liver                                                                                                                                                                                         |
| Pandit et al., 2015 (29)     | Retrospective cohort                              | To assess the frequency of hepatotropic viruses as etiological agents of ALF                                                   | India         | Lower-middle | 3-Jan  | 5-Dec  | Onset of encephalopathy $\leq 28$ days after the onset of symptoms with INR > 2 and increased bilirubin complicated by encephalopathy in patients without a previous history of liver disease                                                                                                                                     |
| Poovorawan et al., 2013 (30) | Prospective cohort                                | To determine the causes and outcomes of Thai children with AHF                                                                 | Thailand      | Upper-middle | 2-Jan  | 5-Sep  | <i>International Association for the Study of the Liver</i> case definition: <b>(Tandon et al, 1999)</b>                                                                                                                                                                                                                          |
| Schwarz et al., 2014 (31)    | Retrospective cohort - Patient registry           | To analyzed results of viral testing among non-acetaminophen ALF study participants                                            | USA/Canada/UK | High         | Dec-99 | 12-Dec | No known evidence of chronic liver disease, with evidence of acute liver injury, and hepatic-based coagulopathy not corrected by vitamin K with the follow parameters: PT $\geq 15$ s or INR $\geq 1.5$ in the presence of clinical HE or a PT $\geq 20$ s or INR $\geq 2.0$ regardless of the presence or absence of clinical HE |
| Shalimar et al., 2017 (32)   | Retrospective cohort                              | To assess the differences in the course of HEV-ALF as compared to other etiologies of ALF                                      | India         | Lower middle | Jan-86 | 15-Dec | <i>International Association for the Study of Liver (IASL)</i> case definition: Occurrence of encephalopathy within 4 weeks from the onset of symptoms in the absence of preexisting liver disease                                                                                                                                |

|    |                                                                                                                                                                    |               |                      |               |        |        |        |                                  |
|----|--------------------------------------------------------------------------------------------------------------------------------------------------------------------|---------------|----------------------|---------------|--------|--------|--------|----------------------------------|
| 1  |                                                                                                                                                                    |               |                      |               |        |        |        | Evidence of liver damage in      |
| 2  |                                                                                                                                                                    |               |                      |               |        |        |        | the absence of prior known       |
| 3  |                                                                                                                                                                    |               |                      |               |        |        |        | chronic liver disease; altered   |
| 4  |                                                                                                                                                                    |               |                      |               |        |        |        | coagulation, expressed as PT     |
| 5  |                                                                                                                                                                    |               |                      |               |        |        |        | >15 s with encephalopathy; or    |
| 6  |                                                                                                                                                                    |               |                      |               |        |        |        | PT > 20 s with or without        |
| 7  |                                                                                                                                                                    |               | To describe the      |               |        |        |        | encephalopathy—all this          |
| 8  | Silverio et al., 2015 (33)                                                                                                                                         | Retrospective | clinical features of | Cuba          | Upper- | 5-Jan  | 11-Dec | within eight weeks of onset of   |
| 9  |                                                                                                                                                                    | cohort        | children treated for |               | middle |        |        | clinical symptoms                |
| 10 |                                                                                                                                                                    |               | ALF                  |               |        |        |        |                                  |
| 11 |                                                                                                                                                                    |               |                      |               |        |        |        |                                  |
| 12 |                                                                                                                                                                    |               |                      |               |        |        |        |                                  |
| 13 |                                                                                                                                                                    |               |                      |               |        |        |        |                                  |
| 14 |                                                                                                                                                                    |               | To investigate the   |               |        |        |        |                                  |
| 15 |                                                                                                                                                                    |               | causes of            |               |        |        |        |                                  |
| 16 | Somasekar et al., 2017                                                                                                                                             | Retrospective | previously           | United States | High   | Jan-98 | 10-Dec | <i>United States Acute Liver</i> |
| 17 | (34)                                                                                                                                                               | cohort        | diagnosed            |               |        |        |        | <i>Failure Study Group</i> case  |
| 18 |                                                                                                                                                                    |               | indeterminate        |               |        |        |        | definition                       |
| 19 |                                                                                                                                                                    |               | cases ALF            |               |        |        |        |                                  |
| 20 |                                                                                                                                                                    |               |                      |               |        |        |        |                                  |
| 21 |                                                                                                                                                                    |               | To study the         |               |        |        |        | Presence of acute liver failure  |
| 22 |                                                                                                                                                                    |               | etiology, outcome    |               |        |        |        | (coagulopathy PT > 20 s or       |
| 23 | Uddin Jamro et al.,                                                                                                                                                | Retrospective | and risk factors for | Pakistan      | Lower- | 7-Jul  | 12-Jun | INR > 2), HE without pre-        |
| 24 | 2013 (35)                                                                                                                                                          | cohort        | FHF in children at   |               | middle |        |        | existing liver disease, within 8 |
| 25 |                                                                                                                                                                    |               | a tertiary care      |               |        |        |        | weeks of the onset of clinical   |
| 26 |                                                                                                                                                                    |               | hospital             |               |        |        |        | liver disease                    |
| 27 |                                                                                                                                                                    |               |                      |               |        |        |        |                                  |
| 28 |                                                                                                                                                                    |               | To identify the      |               |        |        |        |                                  |
| 29 |                                                                                                                                                                    |               | roles of CMV, EBV    |               |        |        |        |                                  |
| 30 |                                                                                                                                                                    |               | and HHV in           |               |        |        |        |                                  |
| 31 | Tsunoda et al., 2017                                                                                                                                               | Prospective   | immunocompetent      | Japan         | High   | 7-Jan  | 13-Dec | Liver dysfunction with           |
| 32 | (36)                                                                                                                                                               | cohort        | children with acute  |               |        |        |        | elevated AST and ALT > 30        |
| 33 |                                                                                                                                                                    |               | liver failure not    |               |        |        |        | IU/L                             |
| 34 |                                                                                                                                                                    |               | resulting from       |               |        |        |        |                                  |
| 35 |                                                                                                                                                                    |               | hepatitis virus      |               |        |        |        |                                  |
| 36 |                                                                                                                                                                    |               |                      |               |        |        |        |                                  |
| 37 |                                                                                                                                                                    |               |                      |               |        |        |        |                                  |
| 38 |                                                                                                                                                                    |               |                      |               |        |        |        | Coagulopathy [PTA ≤40% or        |
| 39 |                                                                                                                                                                    |               | To investigate       |               |        |        |        | INR ≥ 1.5 excluding              |
| 40 | Zhao et al., 2014 (37)                                                                                                                                             | Retrospective | etiologies and       | China         | Middle | 7-Jan  | 12-Dec | hematologic diseases] and        |
| 41 |                                                                                                                                                                    | cohort        | outcomes of          |               |        |        |        | jaundice [Tbil ≥ 171 μmol/L]     |
| 42 |                                                                                                                                                                    |               | children with ALF    |               |        |        |        | within 4 weeks in a child        |
| 43 |                                                                                                                                                                    |               |                      |               |        |        |        | without pre-existing liver       |
| 44 |                                                                                                                                                                    |               |                      |               |        |        |        | diseases                         |
| 45 |                                                                                                                                                                    |               |                      |               |        |        |        |                                  |
| 46 | <b>Abbreviations:</b> ALF = acute liver failure; FHF = fulminant hepatic failure; AHF = acute hepatic failure; HEV = hepatitis E virus; CMV = cytomegalovirus; EBV |               |                      |               |        |        |        |                                  |
| 47 | = Epstein Barr virus; HHV = human herpesvirus; ELISA = enzyme-linked immunosorbent assay; INR = international normalized ratio; PT = prothrombin                   |               |                      |               |        |        |        |                                  |
| 48 | time; s = second; TSB = total serum bilirubin; HE = hepatic encephalopathy; AST = aspartate aminotransferase; ALT = alanine aminotransferase; AP =                 |               |                      |               |        |        |        |                                  |
| 49 | alkaline phosphatase; PTA = plasma thromboplastin antecedent                                                                                                       |               |                      |               |        |        |        |                                  |

Figure 1: Flow diagram for selection of studies

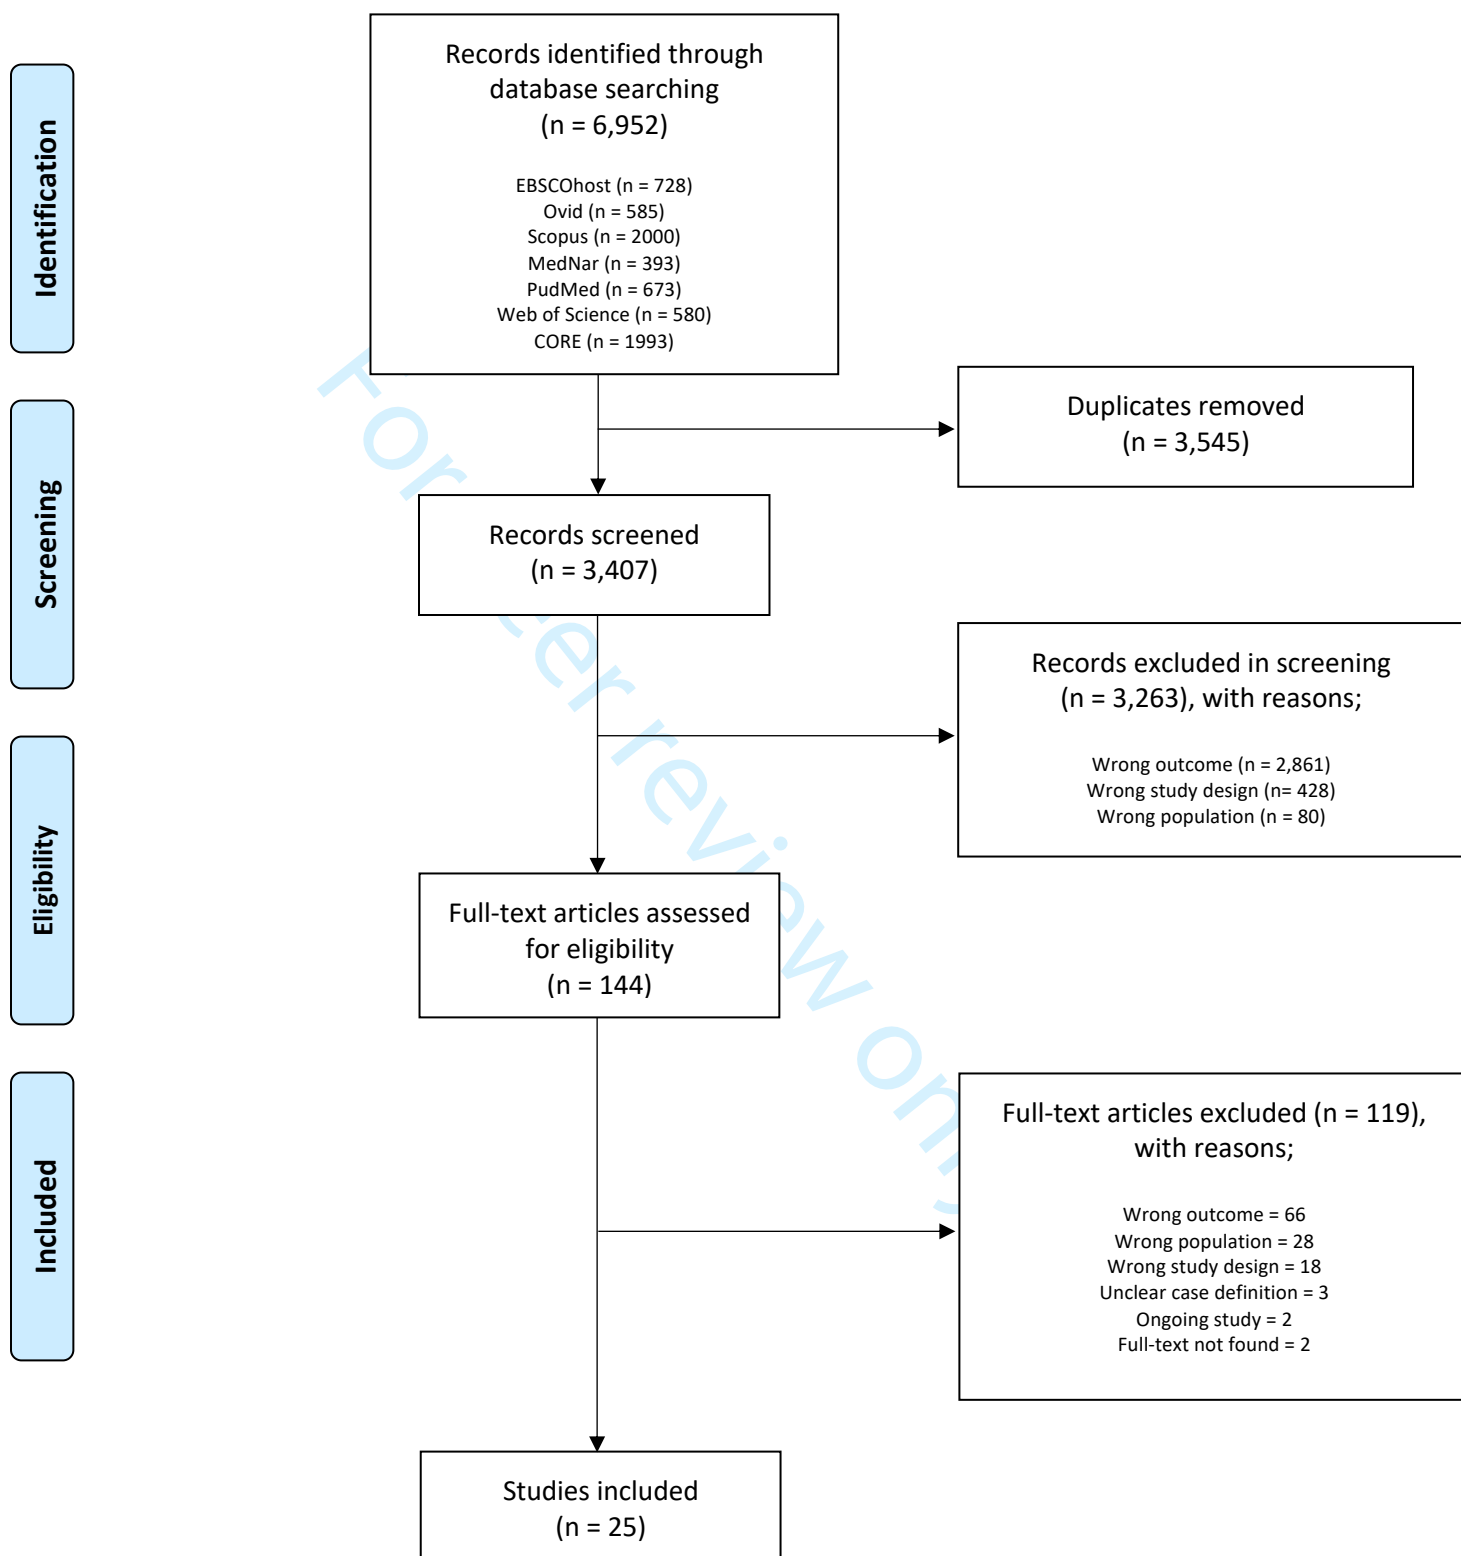

Figure 2: Prevalence of HAV-induced ALF by country HAV immunization status

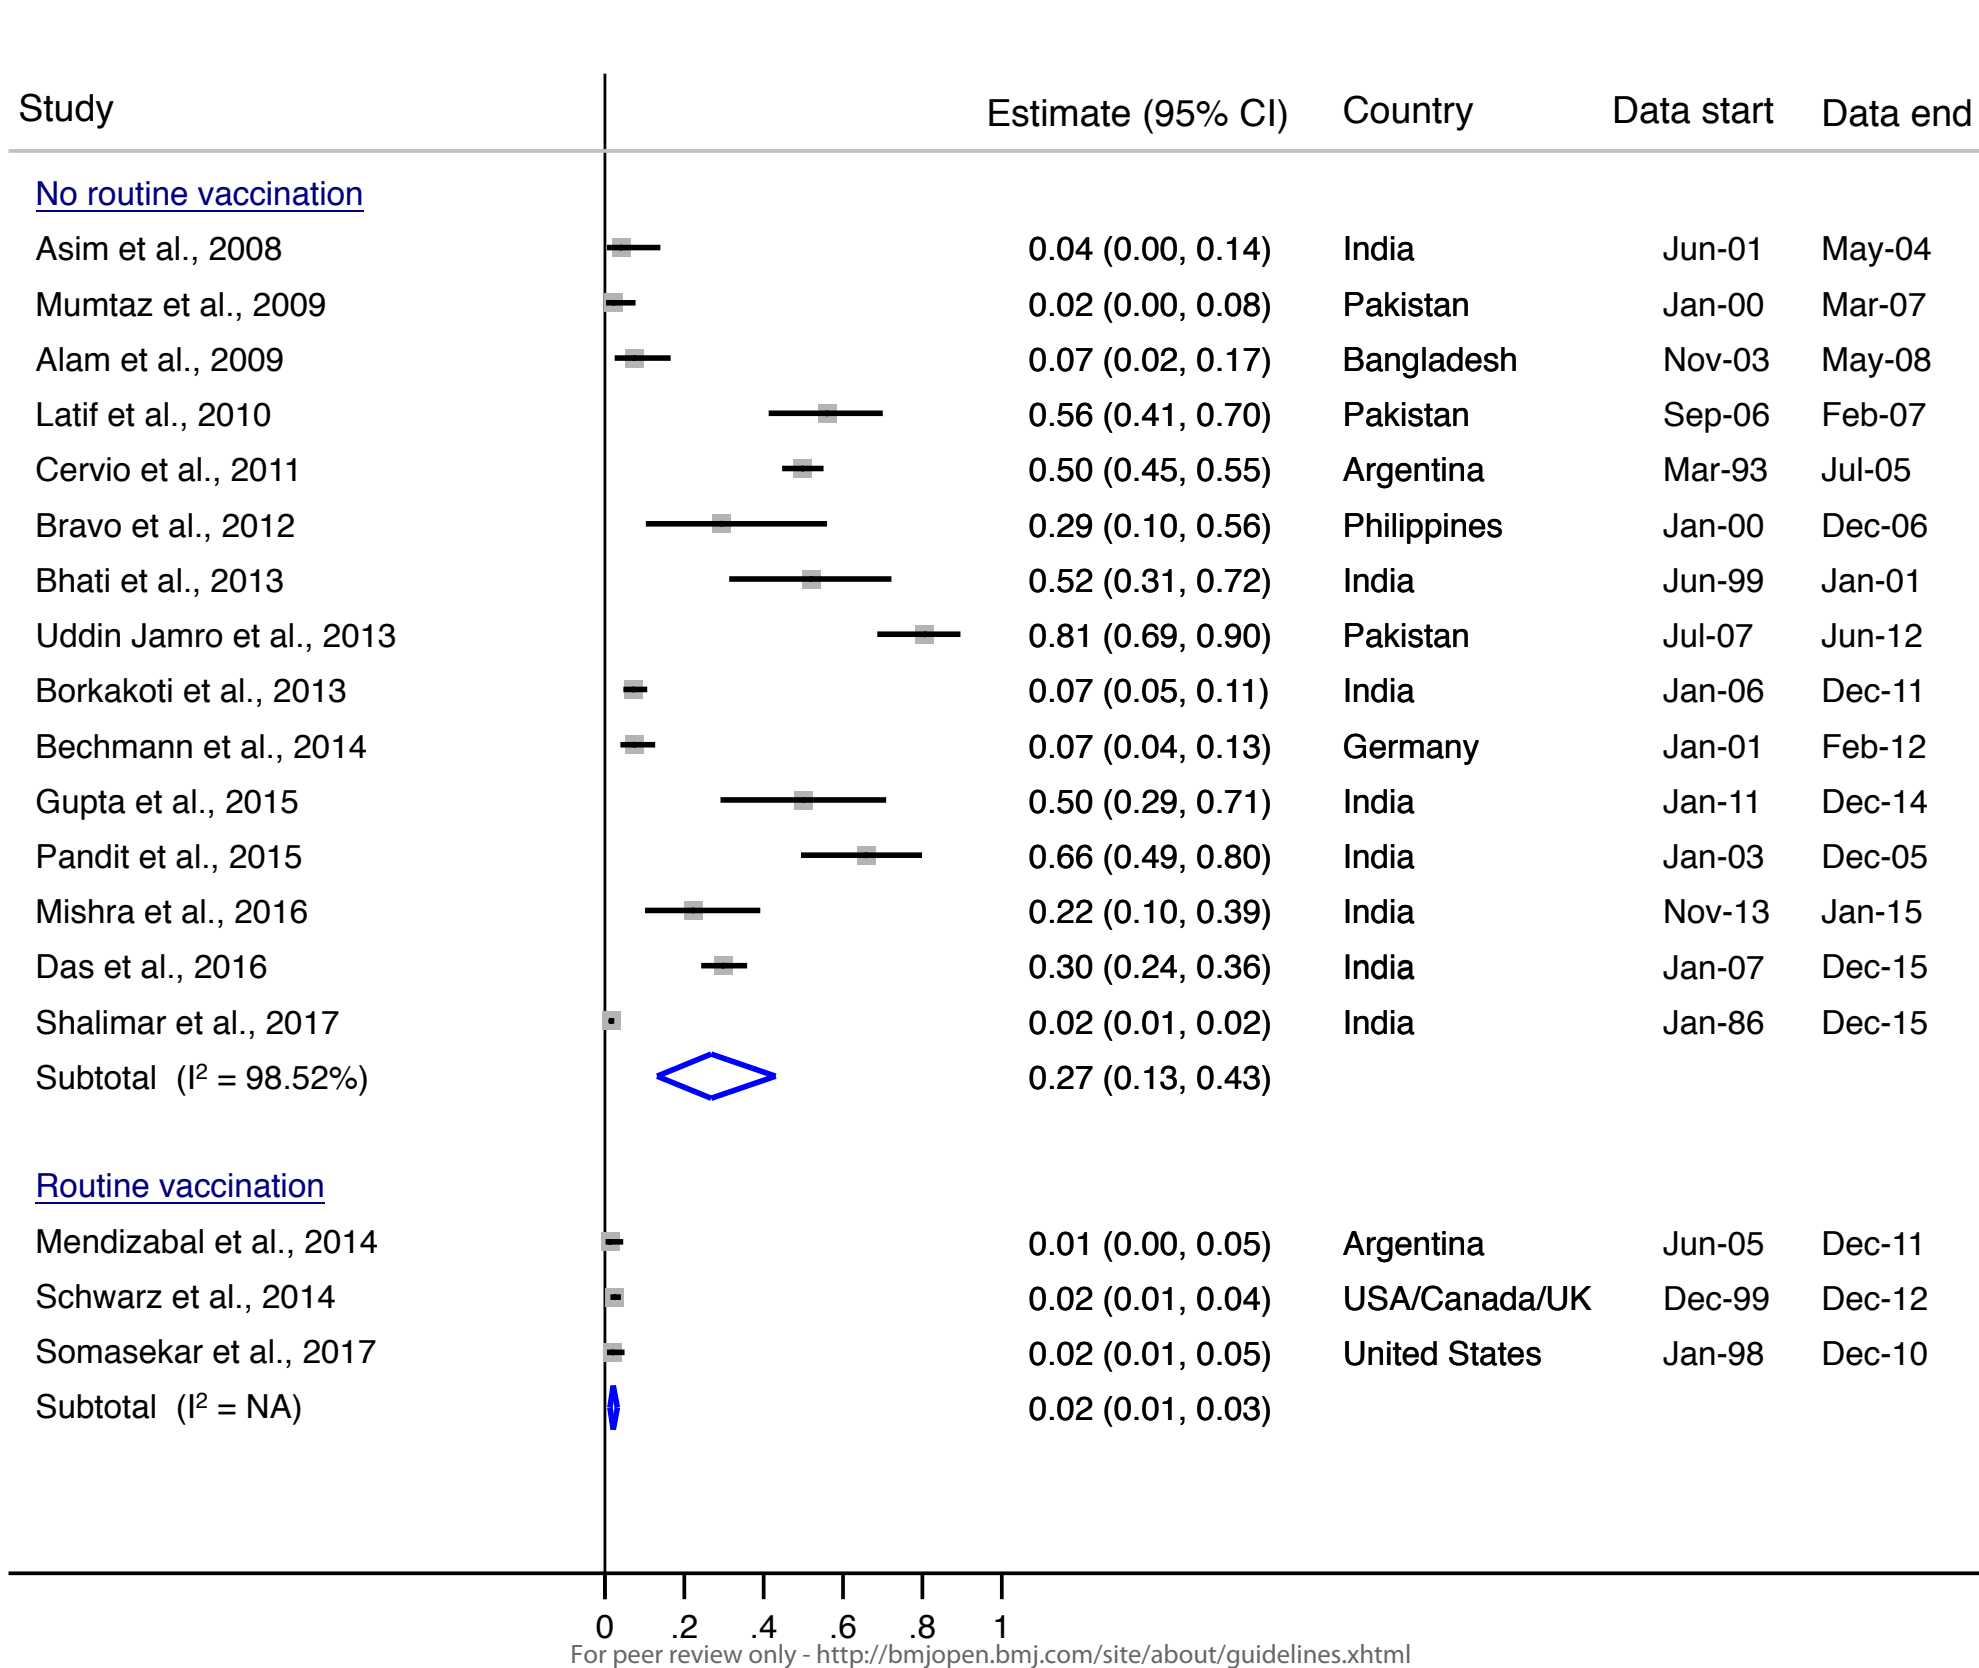



Figure 3: Prevalence of HBV-induced ALF by country HBV immunization status

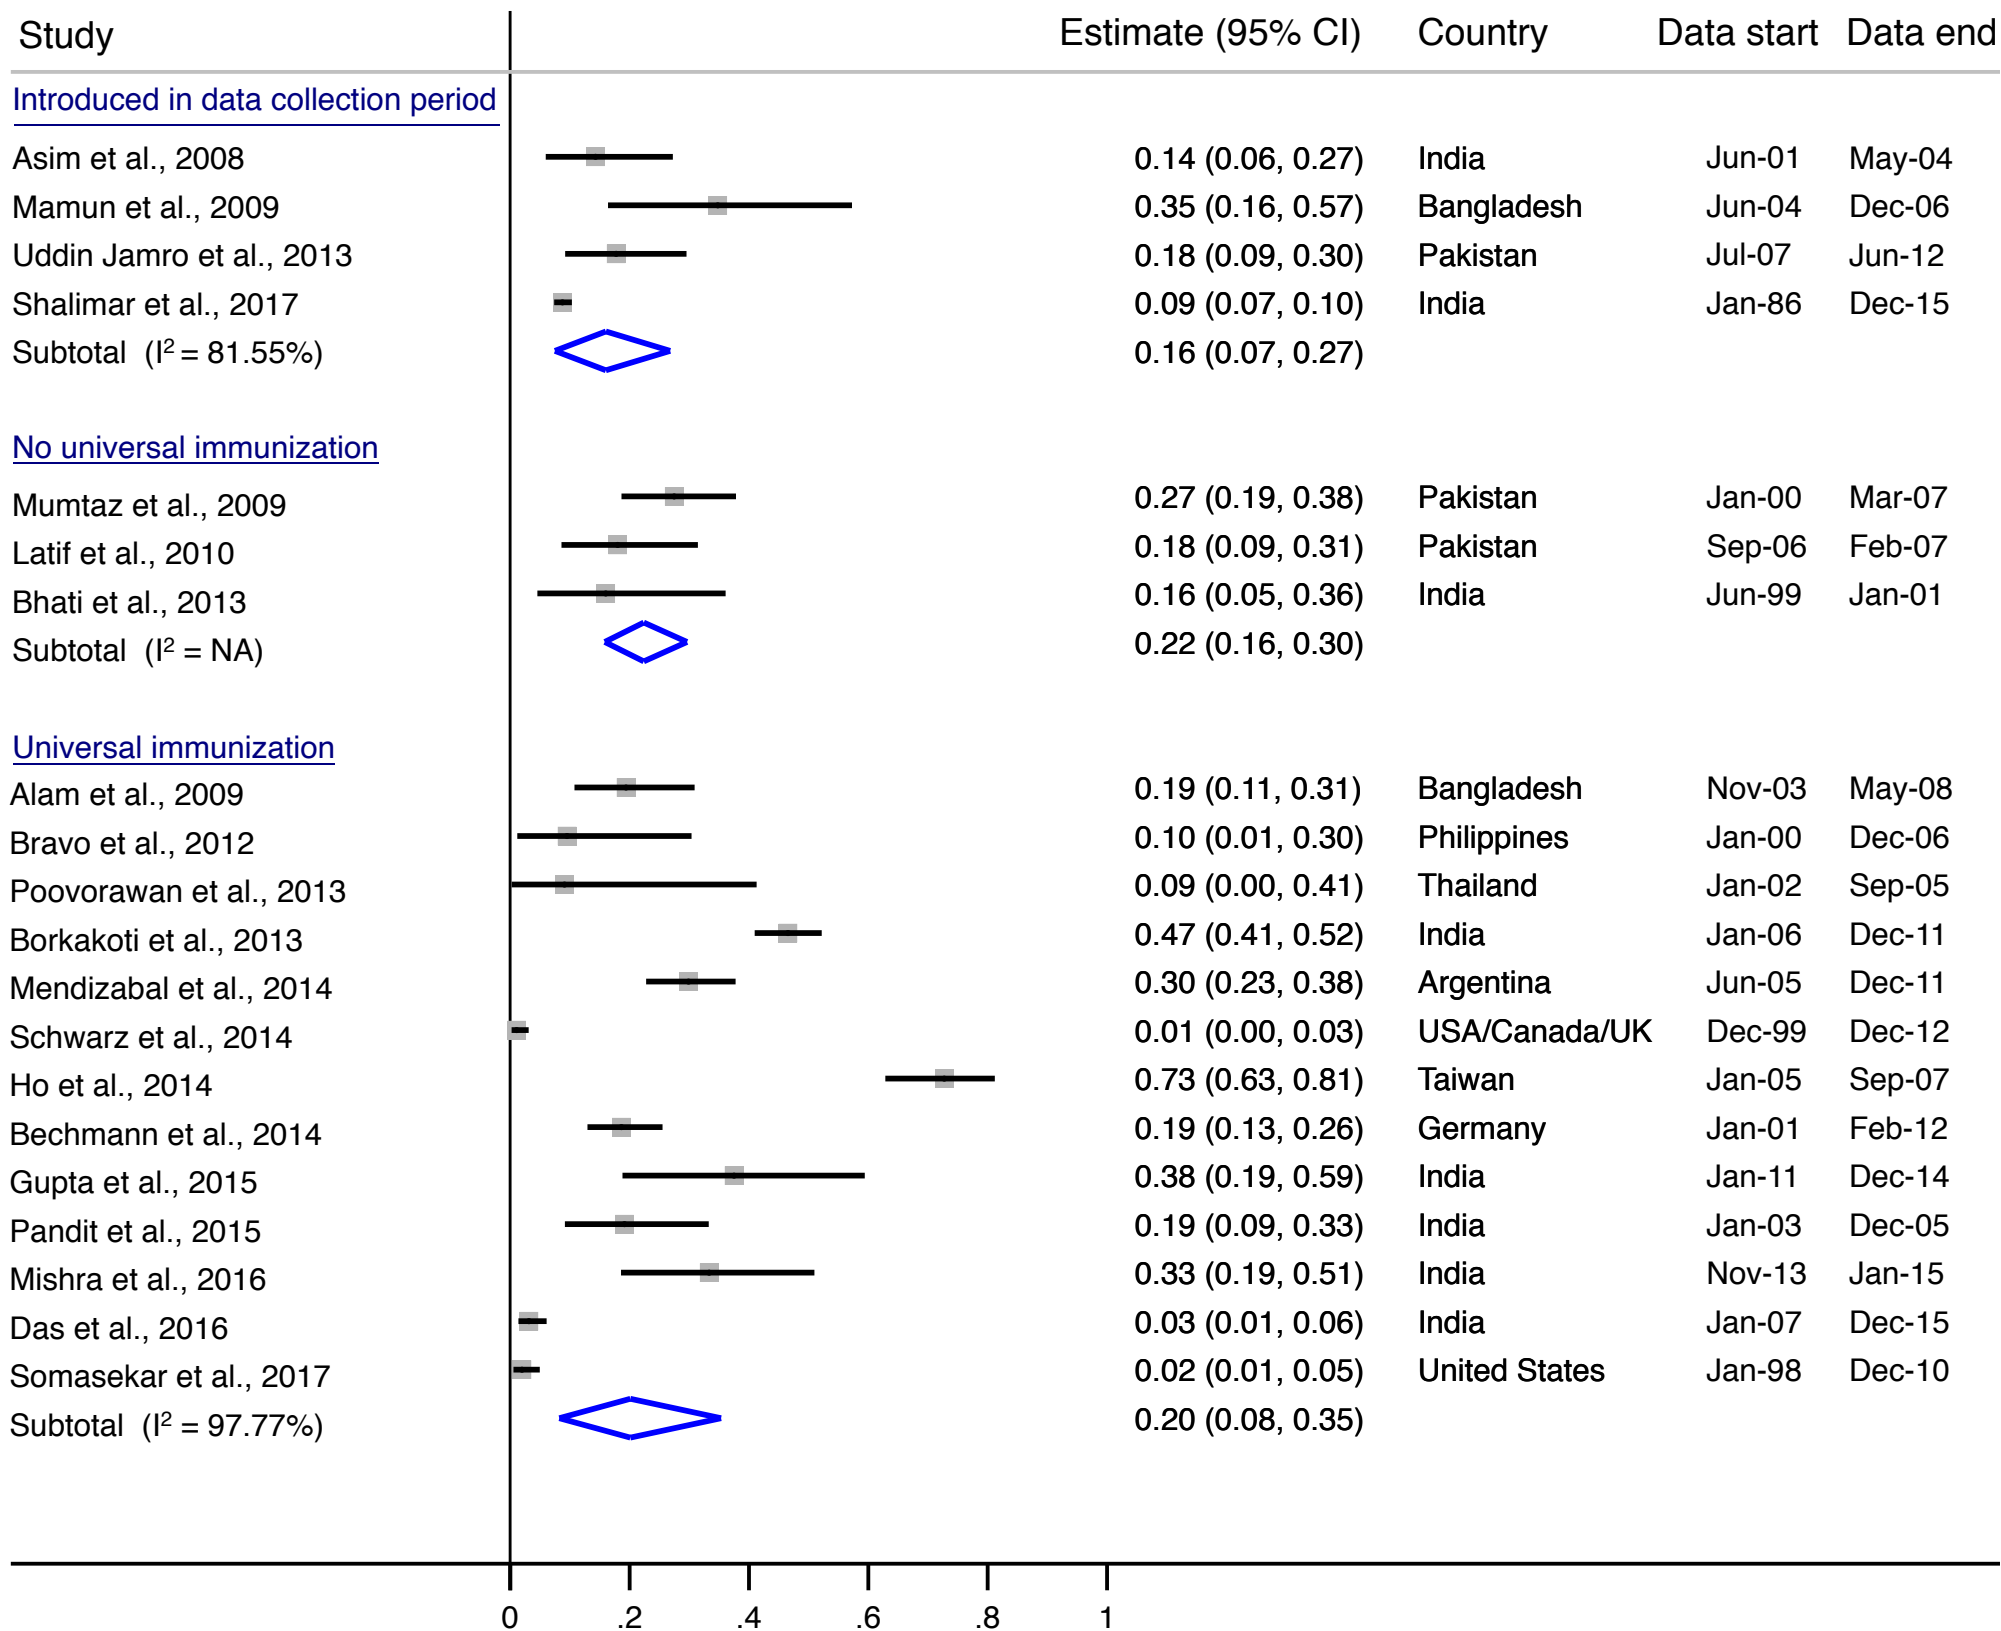

**A** : Mortality rates associated with viral-induced ALF by country income status

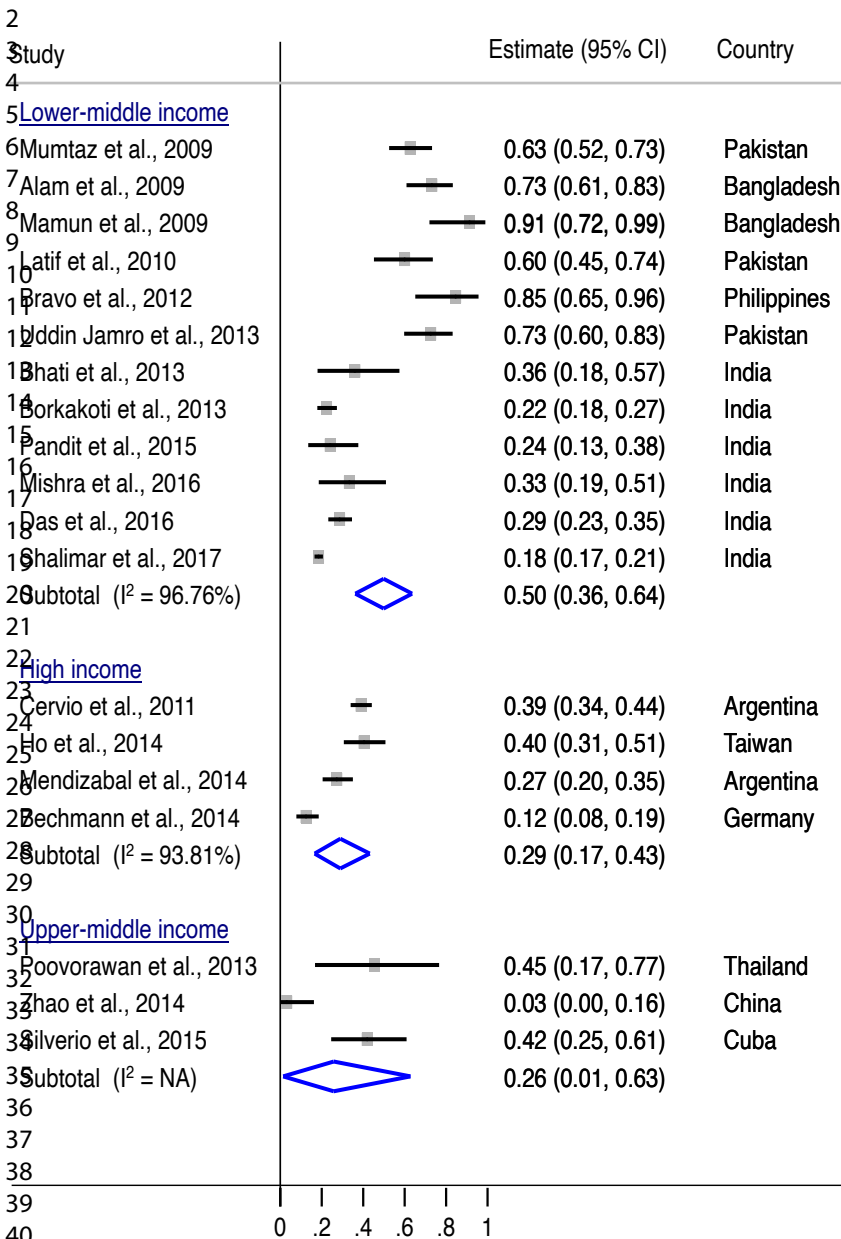

**B** : Prevalence of clinical outcomes associated with viral-induced ALF

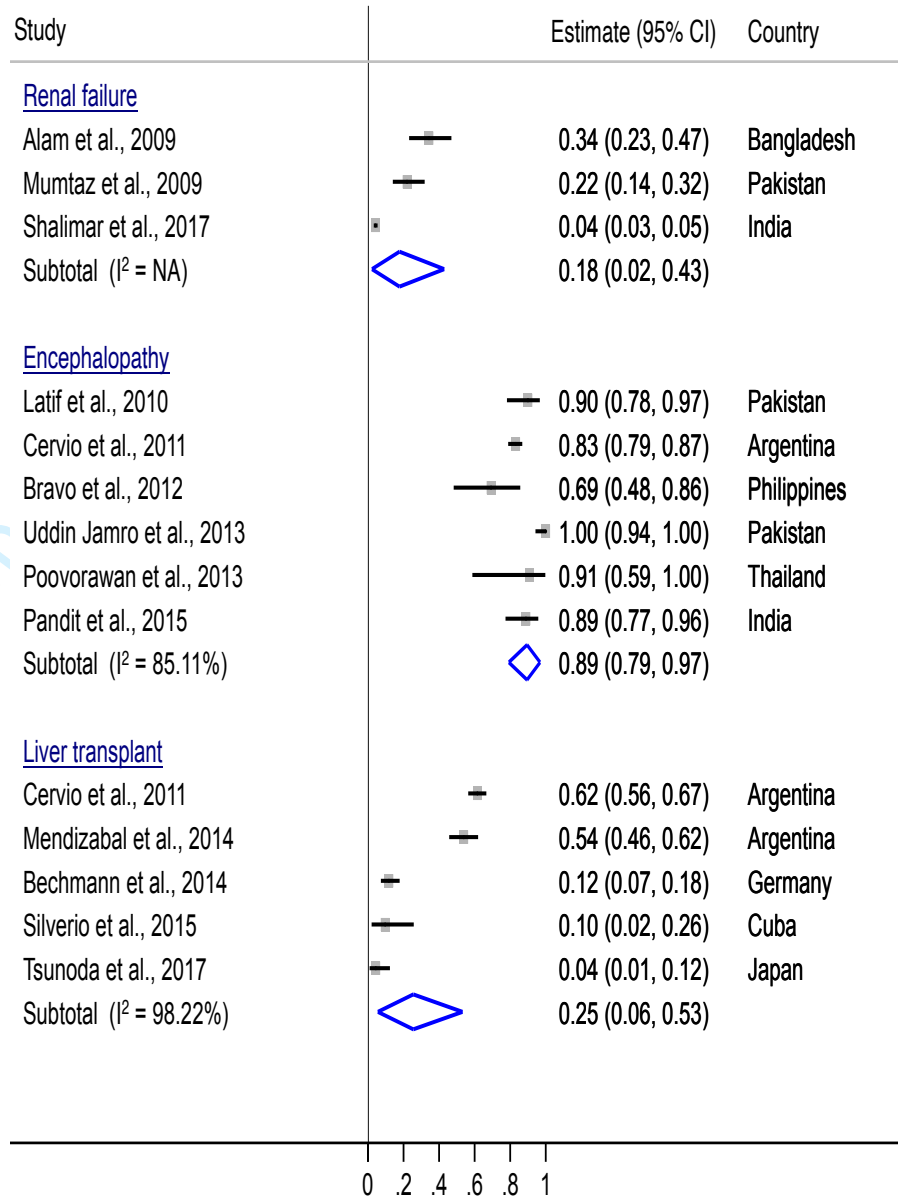

# Supplementary Figure 1: Prevalence of HCV-induced ALF

1  
2  
3  
4  
5  
6  
7  
8  
9  
10  
11  
12  
13  
14  
15  
16  
17  
18  
19  
20  
21  
22  
23  
24  
25  
26  
27  
28  
29  
30  
31  
32  
33  
34  
35  
36  
37  
38

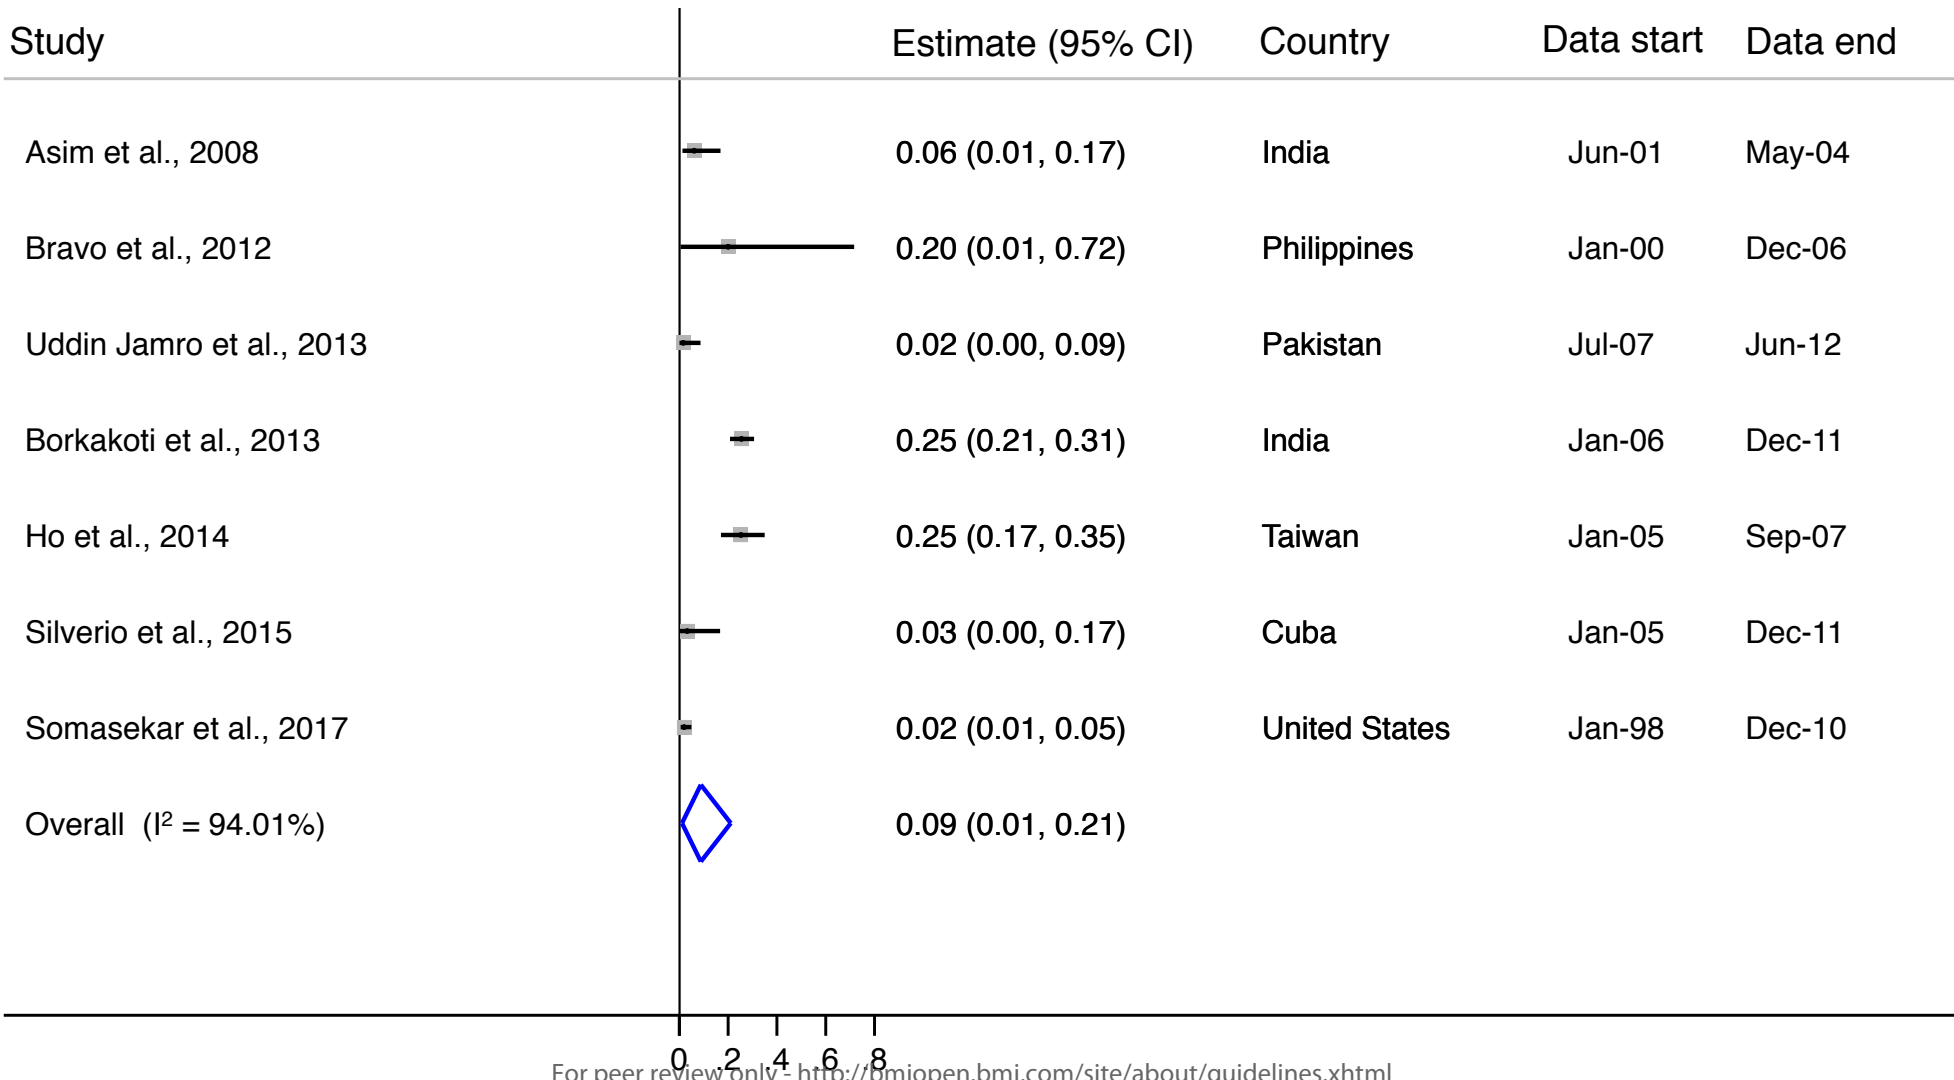

For peer review only - <http://bmjopen.bmj.com/site/about/guidelines.xhtml>

Abbreviations: HCV = hepatitis C virus, ALF = acute liver failure, CI = confidence interval, I<sup>2</sup> = heterogeneity statistic

# Supplementary Figure 2: Prevalence of HEV-induced ALF

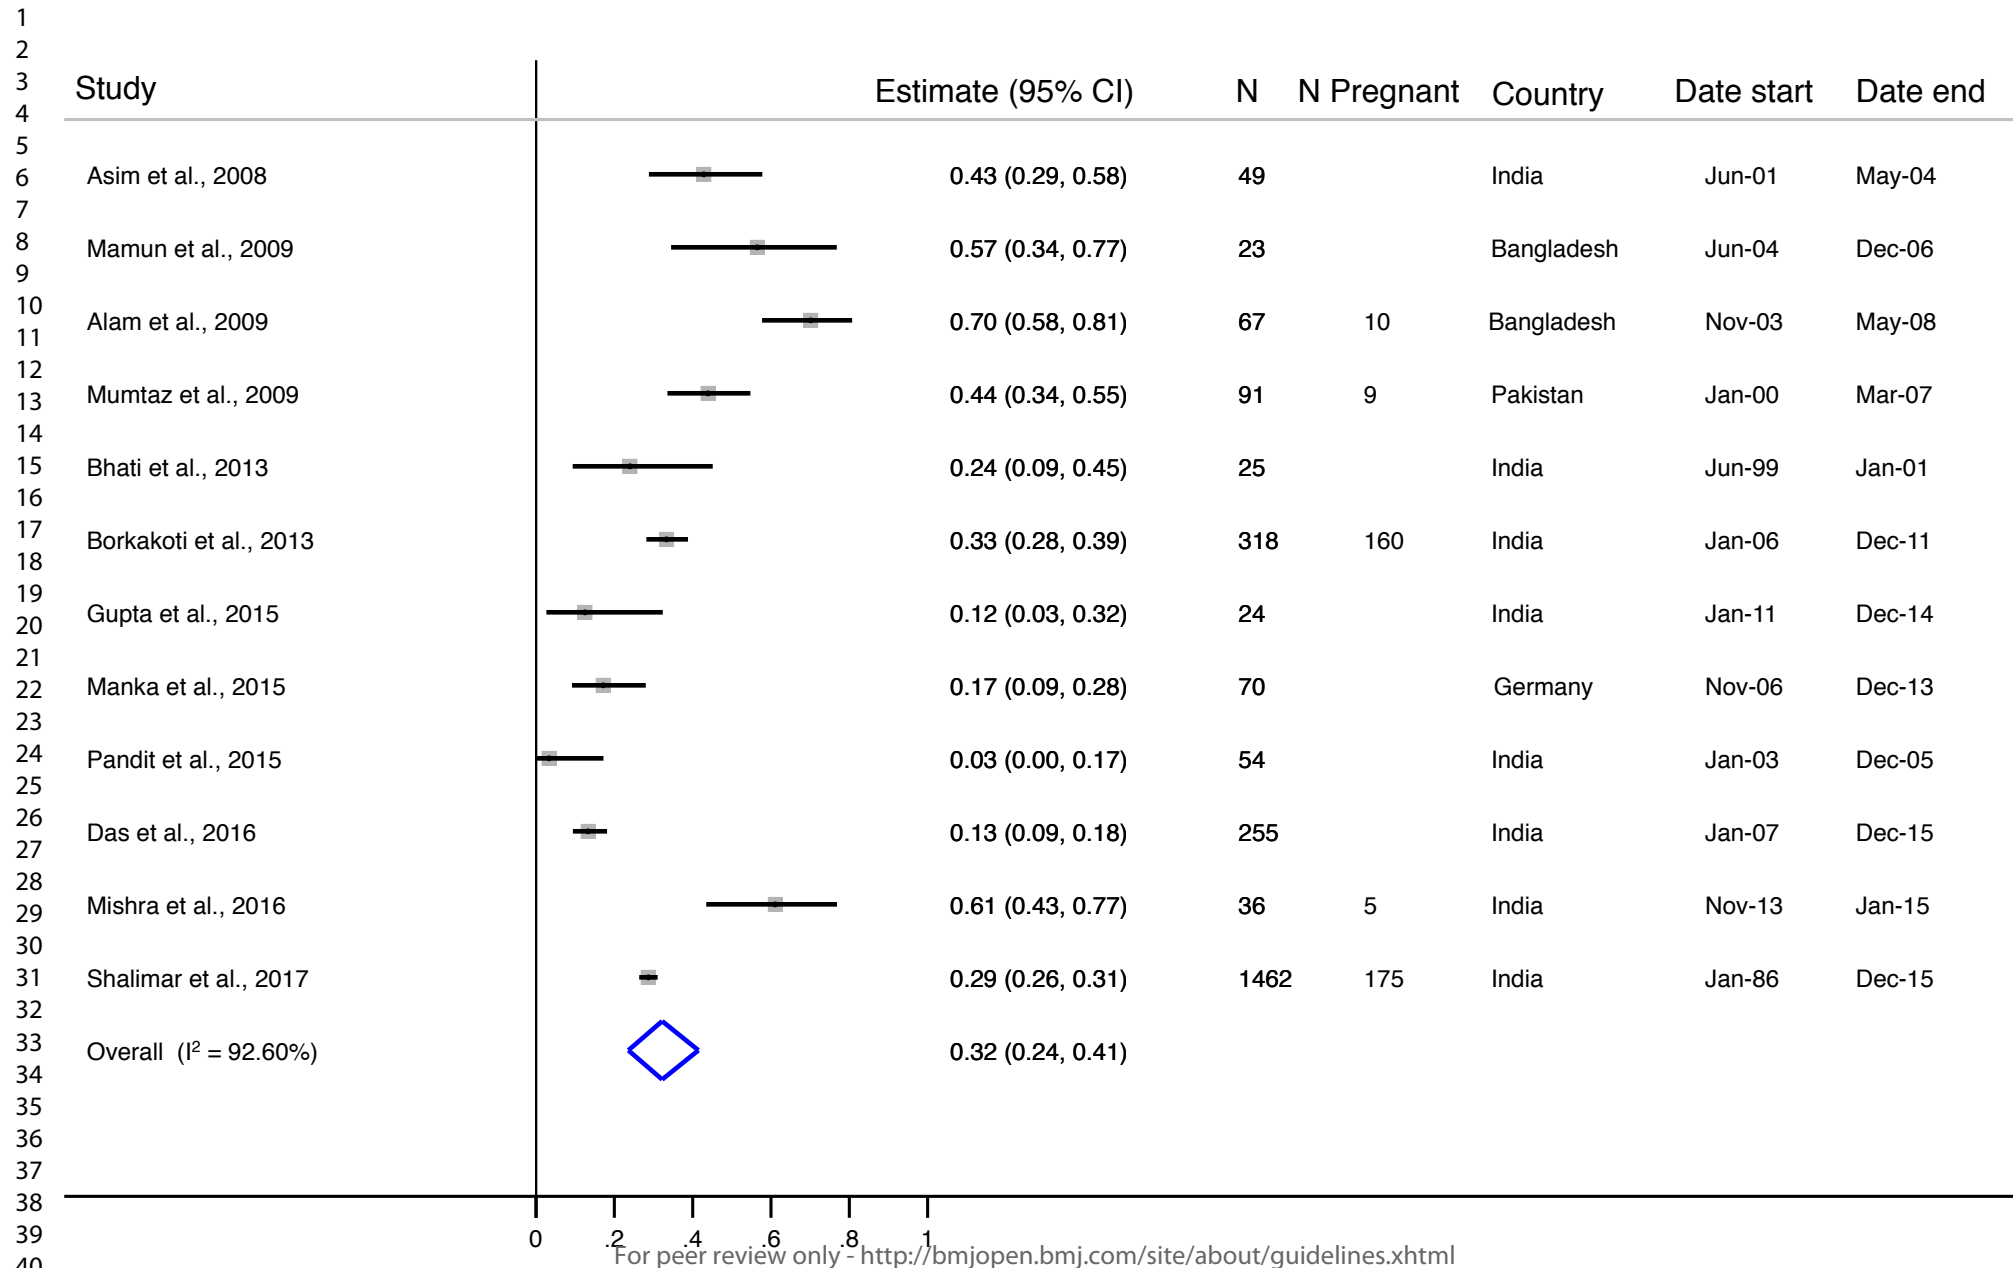

For peer review only - <http://bmjopen.bmj.com/site/about/guidelines.xhtml>

Abbreviations: HEV = hepatitis E virus, ALF = acute liver failure, CI = confidence interval, I<sup>2</sup> = heterogeneity statistic

# Supplementary Figure 3: Prevalence of HDV-, HHV/HSV-, CMV- and EBV-induced AFL

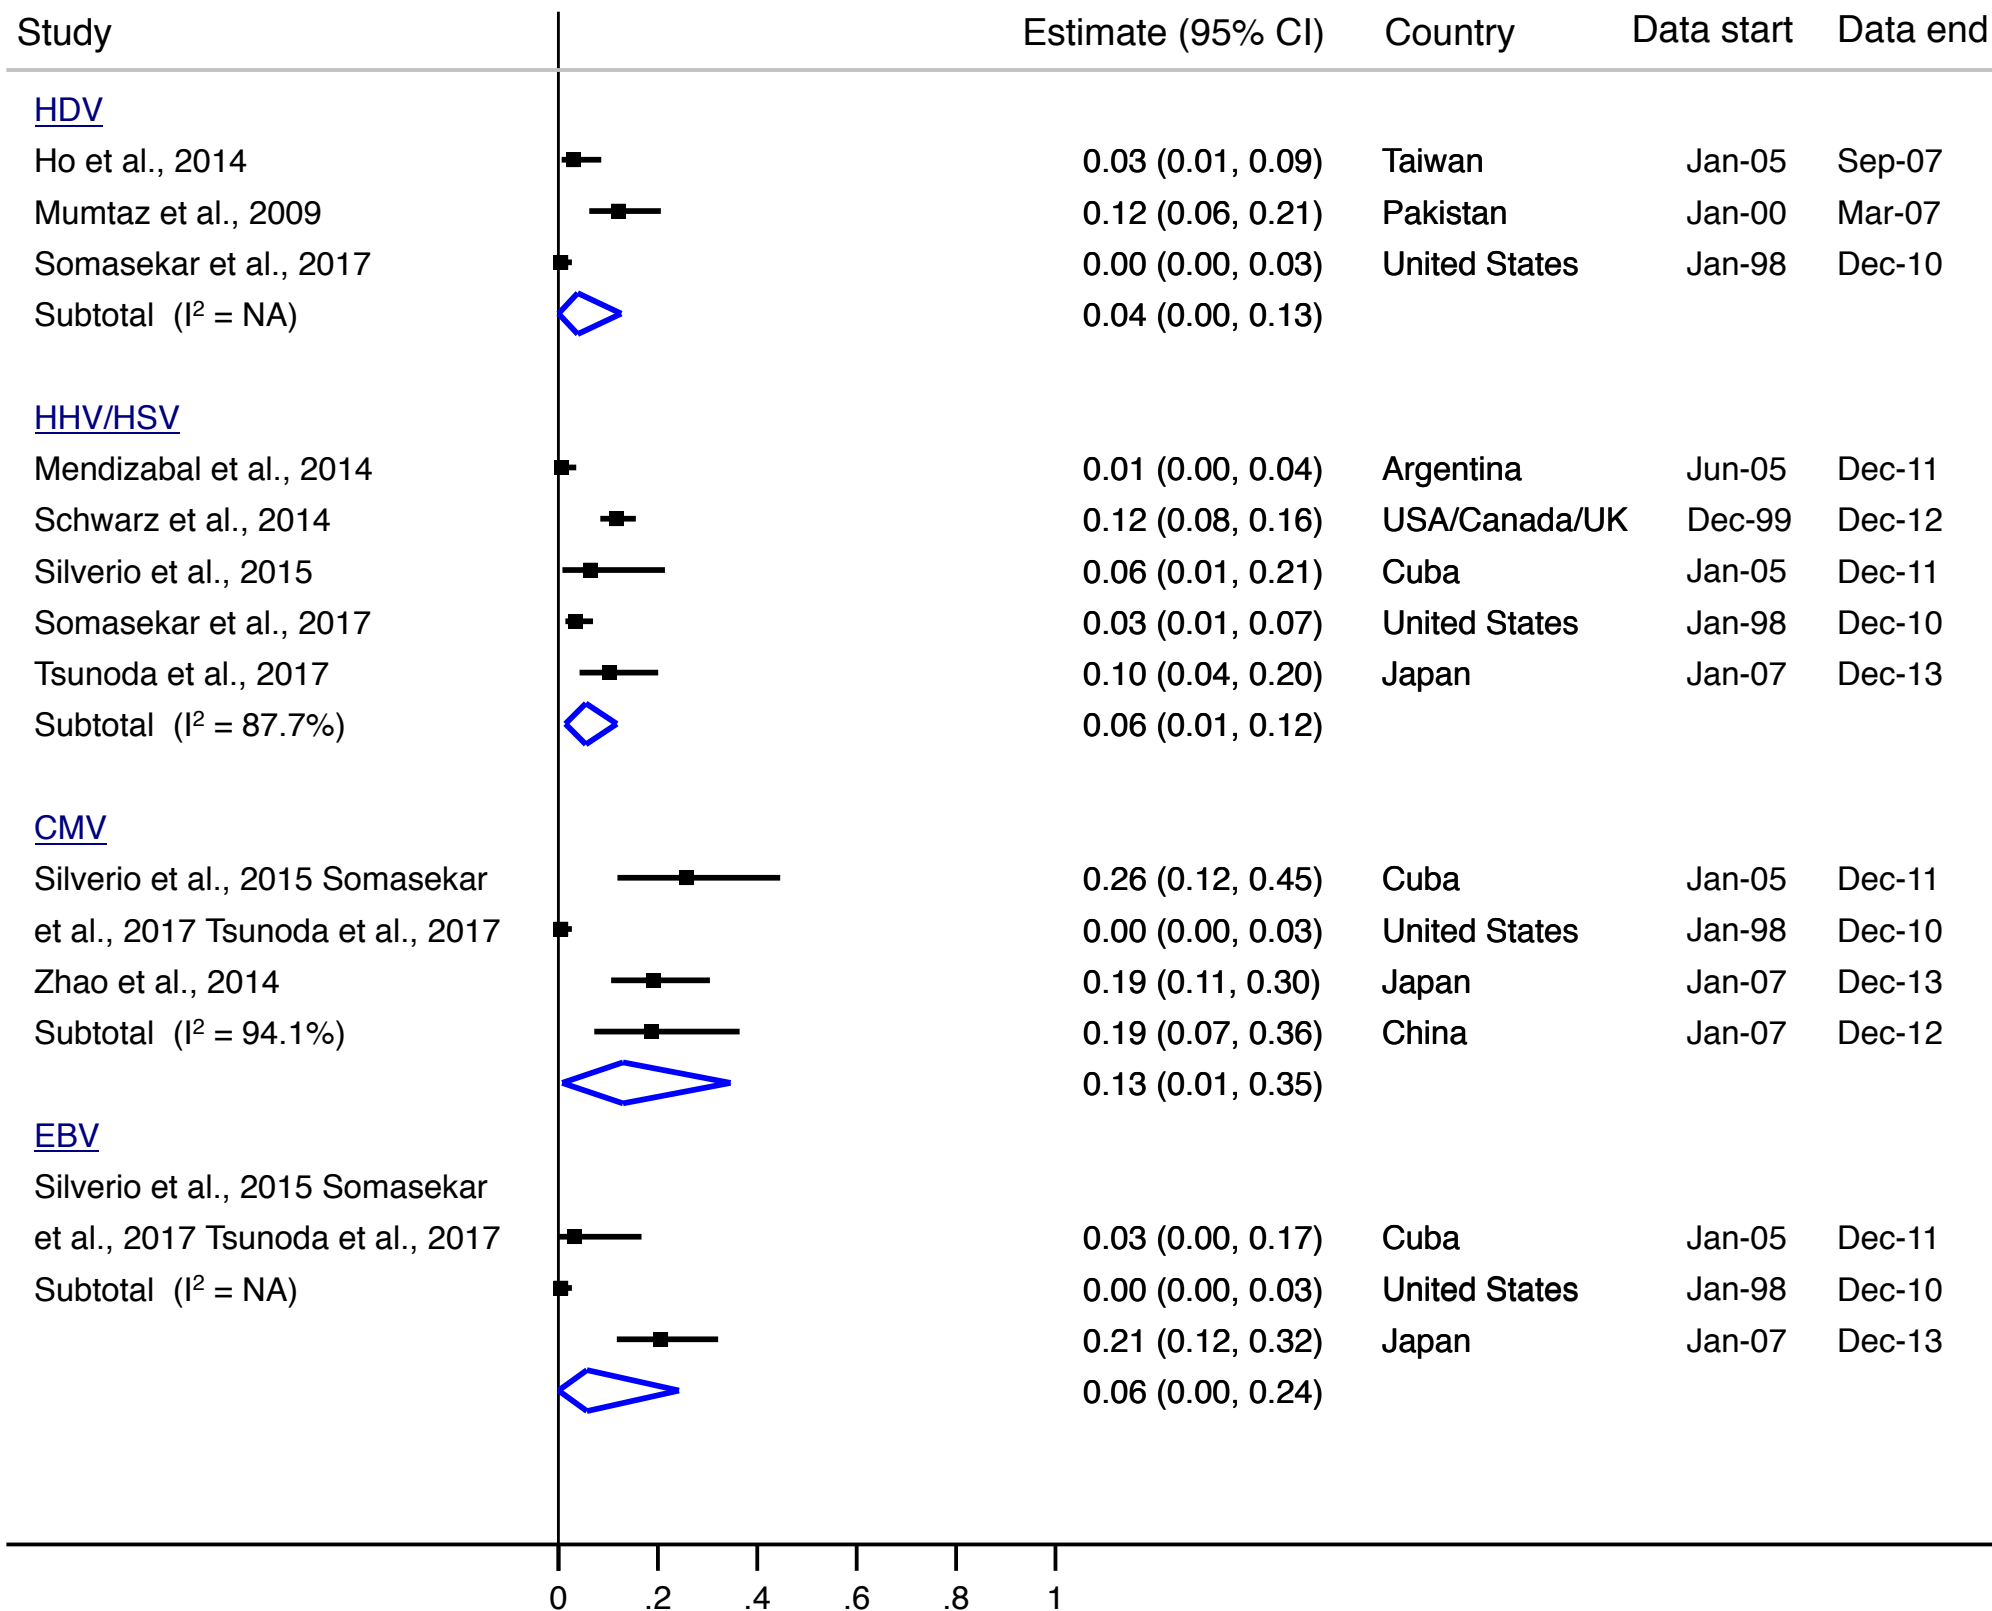

For peer review only - <http://bmjopen.bmj.com/site/about/guidelines.xhtml>

Abbreviations: HDV = hepatitis D virus, HHV/HSV = Human Herpes virus/Herpes Simplex Virus, CMV = Cytomegalovirus, EBV = Epstein-Barr virus, ALF = acute liver failure, CI = confidence interval, I = heterogeneity statistic

## SUPPLEMENTARY TABLE

| Supplementary Table 1: Risk of bias judgements for included studies |                                                            |                                                   |                                              |                                                                  |                                                               |                                          |                          |                                              |                           |                                                               |       |
|---------------------------------------------------------------------|------------------------------------------------------------|---------------------------------------------------|----------------------------------------------|------------------------------------------------------------------|---------------------------------------------------------------|------------------------------------------|--------------------------|----------------------------------------------|---------------------------|---------------------------------------------------------------|-------|
| Study ID                                                            | Represent<br>ation of<br>the<br>national<br>populatio<br>n | Represent<br>ation of<br>target<br>populatio<br>n | Rand<br>om<br>select<br>ion or<br>censu<br>s | Minim<br>al<br>likelih<br>ood of<br>non-<br>respon<br>se<br>bias | Data<br>collecte<br>d<br>directly<br>from<br>particip<br>ants | Accept<br>able<br>case<br>definiti<br>on | Valid<br>measure<br>ment | Same<br>mode<br>of<br>data<br>collect<br>ion | Appropri<br>ate<br>length | Appropri<br>ate<br>numerator<br>(s) and<br>denomina<br>tor(s) | Score |
| Alam et al., 2009                                                   | No                                                         | Yes                                               | No                                           | Yes                                                              | Yes                                                           | Yes                                      | Yes                      | Yes                                          | Yes                       | Yes                                                           | 8     |
| Asim et al., 2009                                                   | Yes                                                        | Yes                                               | No                                           | Yes                                                              | Yes                                                           | Yes                                      | Yes                      | Yes                                          | Yes                       | Yes                                                           | 9     |
| Bechmann et al., 2014                                               | Yes                                                        | Yes                                               | Yes                                          | Yes                                                              | Yes                                                           | Yes                                      | Yes                      | Yes                                          | Yes                       | Yes                                                           | 10    |
| Bhati et al., 2013                                                  | Yes                                                        | No                                                | No                                           | Yes                                                              | Yes                                                           | Yes                                      | Yes                      | Yes                                          | Yes                       | Yes                                                           | 8     |
| Borkakoti et al., 2013                                              | No                                                         | Yes                                               | No                                           | Yes                                                              | Yes                                                           | Yes                                      | Yes                      | Yes                                          | Yes                       | Yes                                                           | 8     |
| Bravo et al., 2012                                                  | No                                                         | No                                                | Yes                                          | Yes                                                              | Yes                                                           | Yes                                      | Yes                      | Yes                                          | Yes                       | Yes                                                           | 8     |
| Cervio et al., 2011                                                 | No                                                         | Yes                                               | Yes                                          | Yes                                                              | Yes                                                           | Yes                                      | Yes                      | Yes                                          | Yes                       | Yes                                                           | 9     |
| Das et al., 2016                                                    | Yes                                                        | Yes                                               | No                                           | Yes                                                              | Yes                                                           | Yes                                      | Yes                      | Yes                                          | Yes                       | Yes                                                           | 9     |
| Gupta et al., 2015                                                  | Yes                                                        | Yes                                               | Yes                                          | Yes                                                              | Yes                                                           | Yes                                      | Yes                      | Yes                                          | Yes                       | Yes                                                           | 10    |
| Ho et al., 2014                                                     | Yes                                                        | Yes                                               | Yes                                          | Yes                                                              | Yes                                                           | Yes                                      | Yes                      | Yes                                          | Yes                       | Yes                                                           | 10    |
| Latif et al., 2010                                                  | No                                                         | Yes                                               | No                                           | Yes                                                              | Yes                                                           | Yes                                      | Yes                      | Yes                                          | Yes                       | Yes                                                           | 9     |
| Mamun et al., 2009                                                  | No                                                         | Yes                                               | No                                           | No                                                               | Yes                                                           | Yes                                      | Yes                      | Yes                                          | Yes                       | Yes                                                           | 9     |
| Manka et al., 2015                                                  | No                                                         | Yes                                               | Yes                                          | No                                                               | Yes                                                           | Yes                                      | No                       | Yes                                          | Yes                       | Yes                                                           | 8     |
| Mendizabal et al., 2014                                             | No                                                         | Yes                                               | Yes                                          | No                                                               | Yes                                                           | Yes                                      | Yes                      | Yes                                          | Yes                       | Yes                                                           | 8     |
| Mishra et al., 2016                                                 | No                                                         | Yes                                               | No                                           | No                                                               | Yes                                                           | Yes                                      | Yes                      | Yes                                          | Yes                       | Yes                                                           | 7     |
| Mumtaz et al., 2009                                                 | Yes                                                        | Yes                                               | Yes                                          | Yes                                                              | Yes                                                           | Yes                                      | Yes                      | Yes                                          | Yes                       | Yes                                                           | 10    |
| Pandit et al., 2015                                                 | No                                                         | Yes                                               | No                                           | No                                                               | Yes                                                           | Yes                                      | Yes                      | Yes                                          | Yes                       | Yes                                                           | 8     |
| Poorawan et al., 2013                                               | Yes                                                        | Yes                                               | Yes                                          | Yes                                                              | Yes                                                           | Yes                                      | Yes                      | Yes                                          | Yes                       | No                                                            | 9     |
| Schwarz et al., 2014                                                | Yes                                                        | Yes                                               | Yes                                          | Yes                                                              | Yes                                                           | Yes                                      | Yes                      | Yes                                          | Yes                       | No                                                            | 9     |
| Shalimar et al., 2017                                               | Yes                                                        | Yes                                               | Yes                                          | Yes                                                              | Yes                                                           | Yes                                      | Yes                      | Yes                                          | Yes                       | Yes                                                           | 10    |
| Silverio et al., 2015                                               | Yes                                                        | Yes                                               | Yes                                          | Yes                                                              | Yes                                                           | Yes                                      | Yes                      | Yes                                          | Yes                       | Yes                                                           | 10    |
| Somasekar et al., 2017                                              | Yes                                                        | Yes                                               | No                                           | No                                                               | Yes                                                           | Yes                                      | Yes                      | Yes                                          | Yes                       | Yes                                                           | 8     |

1  
2  
3  
4  
5  
6  
7  
8  
9  
10  
11  
12  
13  
14  
15  
16  
17  
18  
19  
20  
21  
22  
23  
24  
25  
26  
27  
28  
29  
30  
31  
32  
33  
34  
35  
36  
37  
38  
39  
40  
41  
42  
43  
44  
45  
46  
47  
48  
49  
50  
51  
52  
53  
54  
55  
56  
57  
58  
59  
60

|                                |     |     |     |     |     |     |     |     |     |     |     |    |
|--------------------------------|-----|-----|-----|-----|-----|-----|-----|-----|-----|-----|-----|----|
| Uddin<br>Jamro et<br>al., 2013 | Yes | 10 |
| Tsunoda et<br>al., 2017        | Yes | Yes | Yes | No  | Yes | 9  |
| Zhao et al.,<br>2014           | Yes | Yes | No  | No  | Yes | 8  |

For peer review only

# BMJ Open

## A Systematic Review of the Global Epidemiology of Viral-Induced Acute Liver Failure

|                                 |                                                                                                                                                                                                                                                                                                                                                                                                                                                                                                                                                                                                                                                                                                                                                                                                                                                                                                                                                                                                                                                                                                                                                                                                                                                                                                                                                                                                                                                                                                                                           |
|---------------------------------|-------------------------------------------------------------------------------------------------------------------------------------------------------------------------------------------------------------------------------------------------------------------------------------------------------------------------------------------------------------------------------------------------------------------------------------------------------------------------------------------------------------------------------------------------------------------------------------------------------------------------------------------------------------------------------------------------------------------------------------------------------------------------------------------------------------------------------------------------------------------------------------------------------------------------------------------------------------------------------------------------------------------------------------------------------------------------------------------------------------------------------------------------------------------------------------------------------------------------------------------------------------------------------------------------------------------------------------------------------------------------------------------------------------------------------------------------------------------------------------------------------------------------------------------|
| Journal:                        | <i>BMJ Open</i>                                                                                                                                                                                                                                                                                                                                                                                                                                                                                                                                                                                                                                                                                                                                                                                                                                                                                                                                                                                                                                                                                                                                                                                                                                                                                                                                                                                                                                                                                                                           |
| Manuscript ID                   | bmjopen-2020-037473.R1                                                                                                                                                                                                                                                                                                                                                                                                                                                                                                                                                                                                                                                                                                                                                                                                                                                                                                                                                                                                                                                                                                                                                                                                                                                                                                                                                                                                                                                                                                                    |
| Article Type:                   | Original research                                                                                                                                                                                                                                                                                                                                                                                                                                                                                                                                                                                                                                                                                                                                                                                                                                                                                                                                                                                                                                                                                                                                                                                                                                                                                                                                                                                                                                                                                                                         |
| Date Submitted by the Author:   | 14-Apr-2020                                                                                                                                                                                                                                                                                                                                                                                                                                                                                                                                                                                                                                                                                                                                                                                                                                                                                                                                                                                                                                                                                                                                                                                                                                                                                                                                                                                                                                                                                                                               |
| Complete List of Authors:       | Patterson, Jenna; University of Cape Town Faculty of Health Sciences, Vaccines for Africa Initiative, School of Public Health and Family Medicine<br>Hussey, Hannah; University of Cape Town Faculty of Health Sciences, Vaccines for Africa Initiative, School of Public Health & Family Medicine<br>Silal, Sheetal; University of Cape Town, Department of Statistical Sciences; University of Oxford, Nuffield Department of Medicine<br>Goddard, Liz; University of Cape Town, Department of Paediatrics, Red Cross War Memorial Children's Hospital<br>Setshedi, Mashiko; University of Cape Town, Department of Medicine, Division of Gastroenterology, Groote Schuur Hospital<br>Spearman, Wendy ; University of Cape Town, Department of Medicine, Division of Hepatology, Groote Schuur Hospital<br>Hussey, Gregory; University of Cape Town Faculty of Health Sciences, Institute of Infectious Disease and Molecular Medicine, University of Cape Town, South Africa; University of Cape Town Faculty of Health Sciences, Vaccines for Africa Initiative, School of Public Health and Family Medicine<br>Kagina, Benjamin; University of Cape Town Faculty of Health Sciences, Vaccines for Africa Initiative, School of Public Health and Family Medicine<br>Muloiwa, Rudzani; University of Cape Town, 5Department of Pediatrics & Child Health, Red Cross War Memorial Children's Hospital; University of Cape Town Faculty of Health Sciences, Vaccines for Africa Initiative, School of Public Health and Family Medicine |
| <b>Primary Subject Heading</b>: | Epidemiology                                                                                                                                                                                                                                                                                                                                                                                                                                                                                                                                                                                                                                                                                                                                                                                                                                                                                                                                                                                                                                                                                                                                                                                                                                                                                                                                                                                                                                                                                                                              |
| Secondary Subject Heading:      | Infectious diseases                                                                                                                                                                                                                                                                                                                                                                                                                                                                                                                                                                                                                                                                                                                                                                                                                                                                                                                                                                                                                                                                                                                                                                                                                                                                                                                                                                                                                                                                                                                       |
| Keywords:                       | Epidemiology < INFECTIOUS DISEASES, Hepatology < INTERNAL MEDICINE, VIROLOGY                                                                                                                                                                                                                                                                                                                                                                                                                                                                                                                                                                                                                                                                                                                                                                                                                                                                                                                                                                                                                                                                                                                                                                                                                                                                                                                                                                                                                                                              |
|                                 |                                                                                                                                                                                                                                                                                                                                                                                                                                                                                                                                                                                                                                                                                                                                                                                                                                                                                                                                                                                                                                                                                                                                                                                                                                                                                                                                                                                                                                                                                                                                           |

SCHOLARONE™  
Manuscripts





I, the Submitting Author has the right to grant and does grant on behalf of all authors of the Work (as defined in the below author licence), an exclusive licence and/or a non-exclusive licence for contributions from authors who are: i) UK Crown employees; ii) where BMJ has agreed a CC-BY licence shall apply, and/or iii) in accordance with the terms applicable for US Federal Government officers or employees acting as part of their official duties; on a worldwide, perpetual, irrevocable, royalty-free basis to BMJ Publishing Group Ltd ("BMJ") its licensees and where the relevant Journal is co-owned by BMJ to the co-owners of the Journal, to publish the Work in this journal and any other BMJ products and to exploit all rights, as set out in our [licence](#).

The Submitting Author accepts and understands that any supply made under these terms is made by BMJ to the Submitting Author unless you are acting as an employee on behalf of your employer or a postgraduate student of an affiliated institution which is paying any applicable article publishing charge ("APC") for Open Access articles. Where the Submitting Author wishes to make the Work available on an Open Access basis (and intends to pay the relevant APC), the terms of reuse of such Open Access shall be governed by a Creative Commons licence – details of these licences and which [Creative Commons](#) licence will apply to this Work are set out in our licence referred to above.

Other than as permitted in any relevant BMJ Author's Self Archiving Policies, I confirm this Work has not been accepted for publication elsewhere, is not being considered for publication elsewhere and does not duplicate material already published. I confirm all authors consent to publication of this Work and authorise the granting of this licence.

## A Systematic Review of the Global Epidemiology of Viral-Induced Acute Liver Failure

Jenna Patterson<sup>1,2</sup>, Hannah Sophia Hussey<sup>1,2</sup>, Sheetal Silal<sup>3,4</sup>, Liz Goddard<sup>5</sup>, Mashiko Setshedi<sup>6</sup>, C. Wendy Spearman<sup>7</sup>, Gregory D. Hussey<sup>1,8</sup> Benjamin M. Kagina<sup>1,2</sup> and Rudzani Muloiwa<sup>1,5</sup>

<sup>1</sup>Vaccines for Africa Initiative, University of Cape Town, South Africa

<sup>2</sup>School of Public Health & Family Medicine, University of Cape Town, South Africa

<sup>3</sup>Modelling and Simulation Hub, Africa, Department of Statistical Sciences, Faculty of Science, University of Cape Town, South Africa

<sup>4</sup>Nuffield Department of Medicine, Oxford University, Oxford, United Kingdom

<sup>5</sup>Department of Pediatrics & Child Health, Red Cross War Memorial Children's Hospital, University of Cape Town

<sup>6</sup>Department of Medicine, Division of Gastroenterology, Groote Schuur Hospital, University of Cape Town, South Africa

<sup>7</sup>Division of Hepatology, Department of Medicine, Faculty of Health Sciences, University of Cape Town and Groote Schuur Hospital, South Africa

<sup>8</sup>Institute of Infectious Disease and Molecular Medicine, University of Cape Town, South Africa

<sup>5</sup>Department of Pediatrics & Child Health, Red Cross War Memorial Children's Hospital, University of Cape Town

*Corresponding author:* Jenna Patterson

*Corresponding author's ORCID iD:* 0000-0002-3927-037X

*Corresponding author's email address:* pttjen005@myuct.ac.za

*Corresponding author's postal address:* Vaccines for Africa Initiative, Room N2.09A, Werner Beit North, Health Sciences Campus, Anzio Road, Observatory, 7925

*H.S. Hussey email address:* hshussey@gmail.com

*S. Silal email address:* sheetal.silal@uct.ac.za

*E. Goddard email address:* liz.goddard@uct.ac.za

*M. Setshedi email address:* mashiko.setshedi@uct.ac.za

*W. Spearman email address:* wendy.spearman@uct.ac.za

*G.D. Hussey email address:* gregory.hussey@uct.ac.za

*B.M. Kagina email address:* benjamin.kagina@uct.ac.za

*R. Muloiwa email address:* rudzani.muloiwa@uct.ac.za

## **REQUIRED STATEMENTS**

### **Funding statement**

This project was not supported by any funding source.

### **Conflict of interest disclosure**

All authors have no conflicts of interest to declare.

### **Ethics approval statement**

This study did not require ethics approval as it uses publicly available, published data.

### **Patient consent statement**

This study did not require consent from patients as it uses no individual data.

### **Permission to reproduce material from other sources**

This study has cited all references which are published and publicly available.

## **ABBREVIATIONS**

- Acute liver failure (ALF)
- Hepatitis A virus (HAV)
- Hepatitis B virus (HBV)
- Hepatitis C virus (HCV)
- Hepatitis D virus (HDV)
- Hepatitis E virus (HEV)
- Epstein Barr virus (EBV)
- Herpes simplex virus-1 (HSV1)
- Herpes simplex virus-2 (HSV2)
- Varicella-zoster virus (VZV)
- Human parainfluenza viruses (HPIVs)
- Yellow fever virus (YFV)
- Human herpesvirus 6 (HHV-6)
- Cytomegalovirus (CMV)
- Coxsackievirus (CA16)
- Adenovirus (HAdVs)
- Medical Subject Headings (MESH)
- Low- and middle- income countries (LMICs)

## **ABSTRACT**

**Objectives:** The etiology and burden of viral-induced acute liver failure (ALF) remains unclear, globally. It is important to understand the epidemiology of viral-induced ALF to plan for clinical case management and case prevention.

**Participants:** This systematic review was conducted to synthesize data on the relative contribution of different viruses to the etiology of viral-induced ALF in attempt to compile evidence that is currently missing in the field. Five electronic databases were searched for relevant literature from 2009 to 2019. Twenty-five eligible studies were included in the results of this review.

**Results:** This systematic review estimated the burden of acute liver failure following infection with HBV, HAV, HBV, HCV, HEV, HSV/HHV, CMV, EBV, and parvo-virus B19. Data were largely missing for ALF following infection with VZV, HPIVs, YFV, CA16 and/or HAdVs. The prevalence of HAV-induced ALF was markedly lower in countries with routine HAV immunization vs no routine HAV immunization. Hepatitis E virus was the most common etiological cause of viral-induced ALF reported in this review. In addition, viral-induced ALF had poor outcomes as indicated by high fatality rates, which appear to increase with poor economic status of the studied countries.

**Conclusions:** Immunization against HAV and HBV should be prioritized in LMICs to prevent high viral-induced ALF mortality rates, especially in settings where resources for managing acute liver failure are lacking. The expanded use of HEV immunization should be explored as HEV was the most common cause of ALF.

**Registration:** PROSPERO registration number CRD42017079730

### **Strengths and limitations**

- Our findings show that HAV, HBV and HEV, viruses with effective vaccines, account for a large proportion of viral-induced ALF etiologies.
- The study identifies a specific virus, Hepatitis E, as the most common etiological cause of viral-induced ALF.
- Findings are limited by lack of data for some of the viral etiologies of ALF including for VZV, HPIVs, YFV, CA16 and/or HAdVs, which may have led to an underestimation of the global burden of viral-induced ALF.
- The diversity of viruses attributable to ALF cases and viral detection methods led to high heterogeneity and low statistical power in meta-analyses conducted.

- Our findings support that immunization against HAV, HBV should be prioritized, especially in LMICs where resources for managing viral-induced ALF are glaringly lacking.

## MANUSCRIPT

### Background

Acute liver failure (ALF) refers to the development of encephalopathy and synthetic function impairment following acute liver injury in an individual without pre-existing liver disease (1). The presence of encephalopathy is not required to define ALF in paediatrics, but is an essential component of the definition in adults (1). Possible causes of ALF include viral infections, drugs and toxins, pregnancy related liver diseases, vascular causes and/or malignancies. Acute viral hepatitis has been identified as the most common cause of ALF among all ages in Asia and Africa and one of the most common causes of ALF in children in Asia and South America (2, 3). The incidence of viral-induced ALF has substantially declined in Europe following the introduction of universal immunization against the hepatitis B virus (HBV), with only 19% of all ALF cases now attributable to viral infection in the European population (4). The introduction of routine immunization against the hepatitis A virus (HAV) in Argentina has reduced the number of hepatitis A induced ALF cases by more than 25% (4).

Fatality rates associated with ALF vary between 60% and 80%, depending on the disease etiology as well as a patient's access to care (5, 6). Liver transplantation plays a central role in the management of ALF and remains the only definitive treatment for patients who fail to demonstrate spontaneous recovery (7). A large proportion of patients with ALF in both high and low resource settings, however, are deemed to have contraindications to transplantation or deteriorate beyond transplantation before a liver donor is found (8-10).

The burden of viral-induced ALF around the world still remains unclear, with little to no data collected regarding the disease incidence (3). Establishing the etiology of viral-induced ALF is important for early initiation of treatment, determining the prognosis of the liver failure and identifying potential contraindications to liver transplantation. Most importantly, understanding the epidemiology of vaccine-preventable etiologies of ALF should be prioritised in under-resourced regions with limited access to facilities for transplantation. This review aims to synthesize data on the relative contribution of different viruses to the etiology of viral-induced ALF in attempt to compile evidence that is currently missing in the field.

1  
2  
3 50 *Bernal et al. 2010* completed a review of the burden of acute and fulminant liver failure based on  
4  
5 51 literature published between 1997 and 2009. The review became the bases for guidelines for clinical  
6  
7 52 practice (5). In this systematic review, we assess whether data have changed following the Bernal  
8  
9 53 publication, and whether there is evidence to warrant a review of clinical practice.

## 10 11 54 **Objectives**

- 12 55 • To estimate the prevalence of hepatitis A virus (HAV), hepatitis B virus (HBV), hepatitis C virus  
13 56 (HCV), hepatitis D virus (HDV), hepatitis E virus (HEV), Epstein Barr virus (EBV), herpes simplex  
14 57 virus-1 (HSV1), herpes simplex virus-2 (HSV2), varicella-zoster virus (VZV), parvo-virus B19,  
15 58 human parainfluenza viruses (HPIVs), yellow fever virus (YFV), human herpesvirus 6 (HHV-6),  
16 59 cytomegalovirus (CMV), coxsackievirus (CA16) and/or adenovirus (HAdVs) among patients with  
17 60 ALF.
- 18 61 • To estimate the mortality rate for cases of ALF following infection with HAV, HBV, HCV, HDV,  
19 62 HEV, EBV, HSV1, HSV2, VZV, parvo-virus B19, HPIVs, YFV, HHV-6, CMV, CA16 and/or HAdVs
- 20 63 • To estimate the prevalence and incidence of liver transplantation for cases of ALF following  
21 64 infection with HAV, HBV, HCV, HDV, HEV, EBV, HSV1, HSV2, VZV, parvo-virus B19, HPIVs, YFV,  
22 65 HHV-6, CMV, CA16 and/or HAdVs

## 23 66 24 67 **Methods**

25 68 This systematic review was registered with PROSPERO (registration number CRD42017079730) and the  
26 69 methods for its conduction have been published (11). The results of the review are reported using the  
27 70 Preferred Reporting Items for Systematic Reviews and Meta-analyses (PRISMA) guidelines checklist.

## 28 71 29 72 **Study eligibility criteria**

30 73 Published cross-sectional, surveillance and cohort studies reporting the outcomes of interest in patients  
31 74 with ALF following infection with HAV, HBV, HCV, HDV, HEV, EBV, HSV1, HSV2, VZV, parvo-virus B19,  
32 75 HPIVs, YFV, HHV-6, CMV, CA16 and/or HAdVs were eligible for inclusion in this study. Studies were  
33 76 eligible for inclusion if they had clearly stated case definitions of viral-induced ALF and confirmed ALF  
34 77 cases using both clinical and serological, molecular or culture diagnostic methods.

## 35 78 36 79 **Search strategy**

1  
2  
3 80 A combination of the following search terms (including the use of Medical Subject Headings (MESH))  
4  
5 81 was used and adapted for each of the relevant electronic databases: epidemiology, prevalence,  
6  
7 82 incidence, burden, mortality, morbidity, fulminant hepatic failure, fulminant liver failure, acute hepatic  
8  
9 83 failure, acute liver failure, Hepatitis A virus (HAV), hepatitis B virus (HBV), hepatitis C virus (HCV),  
10  
11 84 hepatitis D virus (HDV), hepatitis E virus (HEV), Epstein Barr virus (EBV), herpes simplex virus-1 (HSV1),  
12  
13 85 herpes simplex virus-2 (HSV2), varicella-zoster virus (VZV), parvo-virus B19, human parainfluenza viruses  
14  
15 86 (HPIVs), yellow fever virus (YFV), human herpesvirus 6 (HHV-6), cytomegalovirus (CMV), coxsackie virus  
16  
17 87 and adenovirus.

18 88  
19 89 The following electronic databases were searched for relevant literature published from 2009 to 2019:  
20 90 EBSCOhost, PubMed, ScienceDirect, Scopus and Web of Science. The search was run on 9 April 2019 and  
21 91 updated via PubMed on 30 September 2019 with no new eligible studies to include.  
22 92

### 23 93 **Data extraction**

24  
25 94 Study characteristics and outcomes of interests were extracted from the included studies on a pre-  
26  
27 95 designed data extraction form by two independent reviewers (JP and HH). Prior to use by the two  
28  
29 96 reviewers, the reliability of the extraction form was assessed by piloting 10 randomly selected articles  
30  
31 97 that met the inclusion criteria. The study team resolved any disagreements in data extraction through  
32  
33 98 consensus in consultation with RM. In cases where studies were in German, HH provided translation. In  
34  
35 99 cases where studies were not available in English or German, google translate was used to translate the  
36  
37 100 article to English (12).

### 38 101 39 102 **Data synthesis and analysis**

40  
41 103 A random-effects model was fitted to the study data as it included data taken from a series of  
42  
43 104 independently performed studies in different populations. We assessed heterogeneity by calculating  $I^2$   
44  
45 105 statistics (threshold  $I^2 > 40\%$ ). The values of  $I^2$  were categorized for heterogeneity as follows: “not  
46  
47 106 important” ( $\leq 40\%$ ), “moderate” ( $> 40\%$  to  $\leq 60\%$ ) and “considerable” ( $> 60\%$  to  $\leq 80\%$ ) and  
48  
49 107 “substantial” ( $> 80\%$  to  $\leq 100\%$ ). Where “not important” or “moderate” heterogeneity existed  
50  
51 108 between studies ( $I^2 \leq 40\%$ ), pooled outcome measures were reported with 95% confidence intervals for  
52  
53 109 each respective outcome. Where “considerable” or “substantial” heterogeneity exists between studies  
54  
55 110 ( $I^2 > 40\%$ ), forest plots and prevalence ranges calculated using the random-effects model were used to  
56  
57 111 narratively describe each outcome.

### 112 **Risk of bias assessment**

113 Each included study was assessed for risk of bias and quality using the Hoy *et al.*, 2012 tool for  
114 observational studies (13, 14). Studies were judged as having 'low risk' if scored 8-10, 'moderate risk' if  
115 scored 5-7 and 'high risk' if scored 0-5. All risk of bias judgements were made by both JP and HH. In case  
116 of disagreement in risk of bias and quality assessment, a final decision was made through consensus in  
117 consultation with RM.

### 119 **Patient and public involvement**

120 This review was developed as part of an ongoing project by the research team that aims to generate  
121 evidence to facilitate evidence-based decision-making of introducing routine hepatitis A vaccination in  
122 South Africa. The findings of this review contribute to the knowledge base that aims to enhance global  
123 vaccination strategies against viral-associated ALF. As this is a systematic review, no patient involvement  
124 was required; however, it is hoped that the findings of this review will help to highlight the burden that  
125 ALF places on populations without routine vaccination.

### 127 **Results**

128 The initial database searches yielded 6,952 records, from which 3,545 duplicates were removed. A  
129 further 3,263 were excluded following the screening of titles and abstracts (**Figure 1**). The full text of the  
130 remaining 144 records were screened by JP and HH, from which 25 studies were deemed to meet the  
131 final inclusion criteria. Twenty-four (96%) of the included studies were cohort studies. As detailed in  
132 **Table 1**, the included studies were published between 2009 and 2017. Included studies were conducted  
133 globally, with 7 studies and 3 studies conducted in India and Pakistan, respectively. The populations  
134 represented by the included studies spanned all age groups and included participants primarily from  
135 hospital settings. As the data in this review was sourced from a variety of countries, age groups and  
136 settings, the heterogeneity was considerable and/or substantial for all results. Thus, we narratively and  
137 graphically reported estimates of combined prevalence rates and the spreads of prevalence.

### 139 **Vaccine-preventable viral-induced ALF**

140 We narratively report the prevalence of HAV- and HBV-induced ALF by country immunization status. The  
141 point prevalence of HAV-induced ALF in countries with no routine HAV immunization at the time of data  
142 collection ranged from 2% to 81% with a combined of 27% (95% CI 13, 43), while the prevalence in  
143 countries with routine HAV immunization at the time of data collection ranged from 1% to 2% with a



1  
2  
3 144 combined of 2% (95% CI 1, 3) (**Figure 2**). In Argentina, the prevalence of HAV-induced ALF prior to  
4  
5 145 routine immunization was approximately 50% (95% CI 45, 55), compared to approximately 1% (95% CI 0,  
6  
7 146 5) after immunization was introduced. The point prevalence of HBV-induced ALF in countries without  
8  
9 147 universal HBV immunization at the time of data collection ranged from 16% to 27% with a combined of  
10  
11 148 22% (95% CI 16, 30) (**Figure 3**). The point prevalence of HBV-induced ALF in countries with universal HBV  
12  
13 149 immunization at the time of data collection ranged from 0% to 83% with a combined of 20% (95% CI = 8,  
14  
15 150 35).

151

### 152 **ALF attributable to non-vaccine-preventable viral infections**

153 The point prevalence of HCV-induced ALF ranged from 2% to 25% with a combined of 9% (95% CI = 1,  
154 21) (**Supplementary Figure 1**). The point prevalence of HEV-induced ALF ranged from 3% to 70% with a  
155 combined of 32% (95% CI 24, 41) (**Supplementary Figure 2**). The point prevalence of HDV-, HHV/HSV-,  
156 CMV-, and EBV-induced ALF were estimated to have combined prevalences of 4% (95% CI 0, 13), 6%  
157 (95% CI 1, 12), 13% (95% CI 1, 35) and 6% (95% CI 0, 24), 10% (95% CI 2, 22), 2% (95% CI 0, 5), and 1%  
158 (95% CI 0, 5), respectively (**Supplementary Figure 3**). Data was not available to estimate the burden of  
159 ALF following infection with HDV, VZV, HPIVS, YFV, CA16 and/or HAdVs as outlined per the published  
160 protocol (11).

161

### 162 **Outcomes of viral-induced ALF**

163 The narratively reported outcomes of viral-induced ALF were found to be severe. The mortality rates  
164 associated with viral-induced ALF in lower-middle income countries ranged from 18% to 91% with a  
165 combined mortality rate of 50% (95% CI 36, 64) (**Figure 4A**). The mortality rates associated with viral-  
166 induced ALF in upper-middle income countries ranged 3% to 45% with a combined mortality rate of 26%  
167 (95% CI 1, 63) (**Figure 4A**). The mortality rates associated with viral-induced ALF in high income countries  
168 ranged from 12% to 40% with a combined mortality rate of 29% (95% CI 17, 43) (**Figure 4A**). The rate of  
169 encephalopathy associated with viral-induced ALF cases in children ranged from 69% to 100% with a  
170 combined rate of 89% (95% CI 79, 97) (**Figure 4B**). The need for liver transplantation with viral-  
171 associated ALF ranged from 4% to 62% with a combined rate of 25% (95% CI 6, 53) (**Figure 4B**). The need  
172 for renal transplant in viral-associated ALF cases ranged from 4% to 34% with a combined rate of 18%  
173 (95% CI 2, 43) (**Figure 4B**).

174

### 175 **Methodological quality**

1  
2  
3 176 Risk of bias scores were assigned by two reviewers (JP and HH) and are described in **Supplementary**  
4  
5 177 **Table 1**. Overall, a majority of the included studies were judged as having ‘low risk’ of bias. Only one  
6  
7 178 included study was judged as having ‘moderate risk’ of bias due to lack of clarity around the  
8  
9 179 representativeness of the study population to the national population, methods of participant selection  
10  
11 180 and methods employed to reduce the likelihood of non-response.  
12

181

## 13 182 **Discussion**

14  
15 183 This systematic review estimated the burden of ALF following infection with HAV, HBV, HCV, HEV,  
16  
17 184 HSV/HHV, CMV, EBV, and parvo-virus B19. The prevalence of HAV-induced ALF is markedly lower in  
18  
19 185 countries with routine HAV immunization while HEV was the most common etiological cause of viral-  
20  
21 186 induced ALF reported in this review. In addition, viral-induced ALF had poor outcomes as indicated by  
22  
23 187 high fatality rates, which seem to increase with poor economic status of the studied countries.  
24

188

25 189 The estimated prevalence of HAV-induced ALF in countries with routine HAV immunization was  
26  
27 190 markedly lower than the estimated prevalence in countries without routine HAV immunization. When  
28  
29 191 looking at countries with data before and after the introduction of routine HAV immunization, the  
30  
31 192 reduction of HAV-induced ALF due to vaccination is further highlighted. The combined prevalence of  
32  
33 193 HBV-induced ALF was the same in settings with or without universal HBV immunization. Countries  
34  
35 194 without universal HBV immunization programs are likely to have weak healthcare systems; thus, the  
36  
37 195 reported prevalence of HBV-induced ALF is assumed to be an underestimate of the true burden in these  
38  
39 196 populations due to weak routine testing and reporting systems. Currently, there is one HEV vaccine  
40  
41 197 (Hecolin) licensed in China that has shown promise with a high degree of efficacy in preventing HEV  
42  
43 198 genotype IV infection in healthy individuals 16 to 65 years (15). Further exploration of the efficacy of this  
44  
45 199 vaccine for prevention of infection with genotypes I and II in different populations should to explore it’s  
46  
47 200 application in different countries and HEV endemicity settings (16).

201

48  
49 202 This review estimated the mortality rate for viral-induced ALF to be approximately 50% in low- and  
50  
51 203 middle- income countries (LMICs) and less than 30% in upper-middle- and high-income countries.  
52  
53 204 Previous studies have estimated that mortality rates associated with ALF vary between 60% and 80%,  
54  
55 205 depending on the disease etiology as well as a patient’s access to care. Our review shows that although  
56  
57 206 viral-induced ALF still carries a significant mortality, though possibly lower than that reported for other  
58  
59 207 ALF etiologies (5, 6). Mortality data largely comes from hospitals with the capacity to diagnose viral-

7

1  
2  
3 208 induced ALF, thus deaths outside of the hospital system or ALF deaths without virological testing may  
4  
5 209 not be captured in these mortality estimates. Liver transplantation is required by approximately 25% of  
6  
7 210 viral-induced ALF cases and approximately 18% of viral-induced ALF cases required renal  
8  
9 211 transplantation, globally. In addition to general lack of resources for transplantation, a significant  
10  
11 212 proportion of potential candidates have contraindications to transplant related to poor socioeconomic  
12  
13 213 status in LMICs. The transplant data included in this review may only reflect successful and unsuccessful  
14  
15 214 transplants, not those that were needed but not carried out due to resource constraints or  
16  
17 215 contraindications.

18  
19 216  
20 217 This review is limited by lack of data for some of the viral etiologies of ALF including for VZV, HPIVs, YFV,  
21  
22 218 CA16 and/or HAdVs, which may have led to an underestimation of the global burden of viral-induced  
23  
24 219 ALF. Additionally, we believe that our findings underestimate the global burden of viral-induced ALF as  
25  
26 220 some important causes of ALF (e.g. HSV/HHV) are believed to be underrecognized as they require PCR  
27  
28 221 testing for diagnosis. The included studies also used varying methods of virus detection including  
29  
30 222 serology and molecular tests which further added to the heterogeneity in the results of our review. This  
31  
32 223 is a well-recognized limitation in studies of ALF where diagnostics are often limited by cost in under-  
33  
34 224 resourced regions where viral causes of ALF are more prevalent. The limited availability of data,  
35  
36 225 including lack of same country data on burden of disease before and after introduction of immunization,  
37  
38 226 hindered most of the planned sub-group analyses outlined in the study protocol. Where data were  
39  
40 227 available, high heterogeneity of the data led to planned meta-analyses and meta-regression analyses  
41  
42 228 not being possible. Lastly, the diversity of viruses attributable to ALF cases led to low statistical power in  
43  
44 229 meta-analyses conducted.

45  
46 230  
47 231 Future research should assess the burden of viral-induced ALF following infection with HDV, VZV, HPIVS,  
48  
49 232 YFV, CA16 and HAdVs. Collectively, high-quality data on all viral etiologies of ALF would allow for better  
50  
51 233 pooling of results. The review team encourages future studies to incorporate health economic estimates  
52  
53 234 and mathematical modelling where data permits to assist health policy decision-makers to better design  
54  
55 235 strategies for the prevention and management of viral-induced ALF. Epidemiological-economic  
56  
57 236 modelling of immunization against HAV, HBV and HEV may well show that introduction of vaccination  
58  
59 237 could lead to future cost savings in the long run due to prevented medical care and liver failure.

60 238

## 239 **Conclusions**

1  
2  
3 240 We successfully addressed the aim of the study although data on VZV, HPIVs, YFV, CA16 and/or HAdVs  
4  
5 241 were missing. Notwithstanding the noted limitations, it is clear that HAV, HBV and HEV – vaccine-  
6  
7 242 preventable ALF etiologies – account for a large proportion of ALF (approximately 21%, 20%, 32% of  
8  
9 243 viral-induced ALF cases, respectively). The burden of ALF that is associated with vaccine-preventable ALF  
10  
11 244 etiologies should be used in conjunction with other available key evidence to inform practice and  
12  
13 245 policies on immunization, particularly in LMICs. A majority of LMICs have established universal  
14  
15 246 vaccination against HBV. The World Health Organization has recently recommended the introduction of  
16  
17 247 an HBV birth dose which is aimed at elimination of the virus and, if successful, will subsequently reduce  
18  
19 248 the burden of HBV-induced ALF. Routine HAV immunization in LMICs, however, are lacking. More data is  
20  
21 249 urgently needed to guide routine use of the vaccine in prevention of morbidity and mortality caused by  
22  
23 250 the virus. Lastly, further applicability of HEV vaccines should be explored, especially in LMICs where  
24  
25 251 resources for managing viral-induced ALF are glaringly lacking.  
26  
27  
28  
29  
30  
31  
32  
33  
34  
35  
36  
37  
38  
39  
40  
41  
42  
43  
44  
45  
46  
47  
48  
49  
50  
51  
52  
53  
54  
55  
56  
57  
58  
59  
60

1  
2  
3 **253 Contributors**

4  
5 254 JP, GDH, BK and RM conceived this study. JP implemented the review under the supervision of RM. JP  
6 255 and HSH performed the study search, screening and extraction of data under the guidance of RM. GDH  
7  
8 256 and BK provided methodological expertise for this review. SS, LG, MS, and WS provided content  
9  
10 257 expertise for this review and all authors will provided comments on the final manuscript before  
11  
12 258 publication. JP is the guarantor of this review.

13 **259 Funding**

14  
15 260 This research received no specific grant from any funding agency in the public, commercial or not-for-  
16  
17 261 profit sectors. The Vaccines for Africa Initiative (VACFA) has funded the costs associated with the  
18  
19 262 research and dissemination of the results, including publications.

20 **263 Competing interests**

21  
22 264 None declared.

23 **265 Data availability**

24  
25 266 All data were taken from published articles available in the public domain.

26  
27 **267 Patient consent for publication**

28  
29 268 Not required.  
30  
31  
32  
33  
34  
35  
36  
37  
38  
39  
40  
41  
42  
43  
44  
45  
46  
47  
48  
49  
50  
51  
52  
53  
54  
55  
56  
57  
58  
59  
60

## REFERENCES

1. EASL Clinical Practical Guidelines on the management of acute (fulminant) liver failure. *Journal of Hepatology*. 2017;66(5):1047-81.
2. Morabito V, Adebayo D. Fulminant Hepatitis: Definitions, Causes and Management. *Health*. 2014;06(10):1038-48.
3. European Association for the Study of the Liver. Electronic address eee, Clinical practice guidelines p, Wendon J, Panel m, Cordoba J, Dhawan A, et al. EASL Clinical Practical Guidelines on the management of acute (fulminant) liver failure. *J Hepatol*. 2017;66(5):1047-81.
4. Cervio G, Trentadue J, D'Agostino D, Luque C, Giorgi M, Armoni J, et al. Decline in HAV-associated fulminant hepatic failure and liver transplant in children in Argentina after the introduction of a universal hepatitis A vaccination program. *Hepat Med*. 2011;3:99-106.
5. Bernal W, Auzinger G, Dhawan A, Wendon J. Acute liver failure. *Lancet*. 2010;376(Seminar):190-201.
6. Wlodzimirow KA, Eslami S, Abu-Hanna A, Nieuwoudt M, Chamuleau RA. Systematic review: acute liver failure - one disease, more than 40 definitions. *Aliment Pharmacol Ther*. 2012;35(11):1245-56.
7. Lee WM, Stravitz RT, Larson AM. Introduction to the revised American Association for the Study of Liver Diseases Position Paper on acute liver failure 2011. *Hepatology*. 2012;55(3):965-7.
8. Spearman CW, McCulloch M, Millar AJ, Burger H, Numanoglu A, Goddard E, et al. Liver transplantation at Red Cross War Memorial Children's Hospital. *South African medical journal = Suid-Afrikaanse tydskrif vir geneeskunde*. 2006;96(9 Pt 2):960-3.
9. O'Grady JG. Acute liver failure. *Postgrad Med J*. 2005;81(953):148-54.
10. O'Grady J. Liver transplantation for acute liver failure. *Best Pract Res Clin Gastroenterol*. 2012;26(1):27-33.
11. Patterson J, Hussey HS, Abdullahi LH, Silal S, Goddard L, Setshedi M, et al. The global epidemiology of viral-induced acute liver failure: a systematic review protocol. *BMJ Open*. 2019.
12. Balk E, Ching M, Chen M, Trikalinos T, L KWC. Assessing the Accuracy of Google Translate to Allow Data Extraction From Trials Published in Non-English Languages. Rockville, USA: Agency for Healthcare Research and Quality; 2013 Jan 2013. Contract No.: EHC145-EF.
13. Hoy D, Brooks P, Woolf A, Blyth F, March L, Bain C. Assessing risk of bias in prevalence studies: Modification of an existing tool and evidence of interrater agreement. *Journal of Clinical Epidemiology*. 2012;65:934-9.
14. Werfalli M, Musekiwa A, Engel ME, Ross I, Kengne AP, Levitt NS. The prevalence of type 2 diabetes mellitus among older people in Africa: a systematic review study protocol. *BMJ Open*. 2014.
15. Li SW, Zhao Q, Wu T, Chen S, Zhang J, Xia NS. The development of a recombinant hepatitis E vaccine HEV 239. *Hum Vaccin Immunother*. 2015;11(4):908-14.
16. Wu X, Chen P, Lin H, Hao X, Liang Z. Hepatitis E virus: Current epidemiology and vaccine. *Human Vaccines and Immunotherapeutics*. 2016;12(10):2603-10.
17. Alam S, Azam G, Mustafa G, Azad AK, Haque I, Gani S, et al. Natural course of fulminant hepatic failure: the scenario in Bangladesh and the differences from the west. *Saudi J Gastroenterol*. 2009;15(4):229-33.
18. Asim M, Singla R, Gupta RK, Kar P. Clinical & molecular characterization of human TT virus in different liver diseases. *Indian Journal of Medical Research*. 2010;131(4):545-54.
19. Bechmann LP, Manka P, Best J, Saner FH, Paul A, Canbay A, et al. Drug-induced liver injury as predominant cause of acute liver failure in a monocenter study. *Deutsche Medizinische Wochenschrift*. 2014;139(17):878-82.
20. Bhatia V, Dhawan A, Arora NK, Mathur P, Das MK, Irshad M. Urinary potassium loss in children with acute liver failure and acute viral hepatitis. *J Pediatr Gastroenterol Nutr*. 2013;57(1):102-8.
21. Borkakoti JH, R. K.; Mohammad, A.; Kumar, A.; Kar, P. Does high viral load of hepatitis E virus influence the severity and prognosis of acute liver failure during pregnancy? *Journal of Medical Virology*. 2013;85(4):620-6.
22. Bravo LC, Gregorio GV, Shafi F, Bock HL, Boudville I, Liu Y, et al. Etiology, incidence and outcomes of acute hepatic failure in 0-18 year old Filipino children. *Southeast Asian J Trop Med Public Health*. 2012;43(3):764-72.
23. Das AK, Begum T, Kar P, Dutta A. Profile of Acute Liver Failure from North-east India and Its Differences from other Parts of the Country. *Euroasian J Hepatogastroenterol*. 2016;6(2):111-5.
24. Gupta P, Mittal M, Bhat NK, Agarwal RK, Gupta P, Mittal G. A hospital based retrospective study on hepatotropic viruses as a cause of acute viral hepatitis in children in Uttarakhand, India. *Indian Journal of Community Health*. 2015;27(4):451-5.
25. Ho CM, Lee CH, Wang JY, Lee PH, Lai HS, Hu RH. Nationwide longitudinal analysis of acute liver failure in taiwan. *Medicine (Baltimore)*. 2014;93(4):e35.
26. Latif N, Mehmood K. Risk factors for fulminant hepatic failure and their relation with outcome in children. *J Pak Med Assoc*. 2010;60(3):175-8.
27. Mamun AI M, Rahman S, Khan M, Karim F. HEV infection as an aetiologic factor for acute hepatitis: experience from a tertiary hospital in Bangladesh. *J Health Popul Nutr*. 2009;27(1):14-9.
28. Manka P, Bechmann LP, Coombes JD, Thodou V, Schlattjan M, Kahraman A, et al. Hepatitis E Virus Infection as a Possible Cause of Acute Liver Failure in Europe. *Clin Gastroenterol Hepatol*. 2015;13(10):1836-42.e2; quiz e157-8.
29. Mendizabal MM, S.; Videla, M. G.; Anders, M.; Zerega, A.; Balderramo, D. C.; Chan, D.; Barrabino, M.; Gil, O.; Mastai, R.; Yantorno, S.; Gadano, A.; Silva, M. O. Changing etiologies and outcomes of acute liver failure: Perspectives from 6 transplant centers in Argentina. *Liver Transplantation*. 2014;20(4):483-9.
30. Mishra SB, J.; Kumar, S.; Kar, P. Role of HEV antigen detection in HEV-related acute viral hepatitis and acute liver failure. *Journal of Medical Virology*. 2016;88(12):2179-85.
31. Mumtaz K, Azam Z, Hamid S, Abid S, Memon S, Ali Shah H, et al. Role of N-acetylcysteine in adults with non-acetaminophen-induced acute liver failure in a center without the facility of liver transplantation. *Hepatology International*. 2009;3(4):563-70.
32. Pandit A, Mathew LG, Bavdekar A, Mehta S, Ramakrishnan G, Datta S, et al. Hepatotropic viruses as etiological agents of acute liver failure and related-outcomes among children in India: a retrospective hospital-based study. *BMC Res Notes*. 2015;8:381.

- 1  
2  
3 33. Poovorawan Y, Chongsrisawat V, Shafi F, Boudville I, Liu Y, Hutagalung Y, et al. Acute hepatic failure among hospitalized Thai children. *Southeast Asian J Trop Med Public Health*. 2013;44(1):50-3.
- 4 34. Schwarz KBO, Dominic Dell; Lobritto, Steven J.; Lopez, M. James; Rodriguez-Baez, Norberto; Yazigi, Nada A.; Belle, Steven H.; Zhang, Song; Squires, Robert H.; for the Pediatric Acute Liver Failure Study, Group. Analysis of Viral Testing in Nonacetaminophen Pediatric Acute Liver Failure. *Journal of Pediatric Gastroenterology & Nutrition*. 2014;59(5):616-23.
- 5 35. Shalimar, Kedia S, Gunjan D, Sonika U, Mahapatra SJ, Nayak B, et al. Acute Liver Failure Due to Hepatitis E Virus Infection Is Associated with Better Survival than Other Etiologies in Indian Patients. *Dig Dis Sci*. 2017;62(4):1058-66.
- 6 36. Silverio CE, Smithen-Romany CY, Hondal NI, Diaz HO, Castellanos MI, Sosa O. Acute liver failure in Cuban children. *MEDICC Rev*. 2015;17(1):48-54.
- 7 37. Somasekar SL, D.; Rule, J.; Naccache, S. N.; Stone, M.; Busch, M. P.; S.; ers, C.; Lee, W. M.; Chiu, C. Y. Viral Surveillance in Serum Samples from Patients with Acute Liver Failure by Metagenomic Next-Generation Sequencing. *Clinical Infectious Diseases*. 2017;65(9):1477-85.
- 8 38. Uddin Jamro BMC, S.; Mal Makheja, P.; Ahmed Soomro, A. Etiology, outcome and risk factors for fulminant hepatic failure in children at a tertiary care hospital, Sukkur, Pakistan. *Rawal Medical Journal*. 2013;38(3):219-22.
- 9 39. Tsunoda T, Inui A, Iwasawa K, Oikawa M, Sogo T, Komatsu H, et al. Acute liver dysfunction not resulting from hepatitis virus in immunocompetent children. *Pediatr Int*. 2017;59(5):551-6.
- 10 40. Zhao P, Wang CY, Liu WW, Wang X, Yu LM, Sun YR. Acute liver failure in Chinese children: a multicenter investigation. *Hepatobiliary Pancreat Dis Int*. 2014;13(3):276-80.
- 11  
12  
13  
14  
15  
16  
17  
18  
19  
20  
21  
22  
23  
24  
25  
26  
27  
28  
29  
30  
31  
32  
33  
34  
35  
36  
37  
38  
39  
40  
41  
42  
43  
44  
45  
46  
47  
48  
49  
50  
51  
52  
53  
54  
55  
56  
57  
58  
59  
60

**FIGURE LEGENDS**

Figure 1  
PRISMA Flow Diagram describing selection of studies.

Figure 2  
Abbreviations: HAV = hepatitis A virus, ALF = acute liver failure, CI = confidence interval, I2 = heterogeneity statistic

Figure 3  
Abbreviations: HBV = hepatitis B virus, ALF = acute liver failure, CI = confidence interval, I2 = heterogeneity statistic

Figure 4  
Abbreviations: ALF = acute liver failure, CI = confidence interval, I2=heterogeneity statistic, NA = not applicable



**TABLES**

| Table 1: Characteristics of included studies |                      |                                                                                                                                                                   |            |              |                          |                        |                                                                                                                                                                                                                                                                  |
|----------------------------------------------|----------------------|-------------------------------------------------------------------------------------------------------------------------------------------------------------------|------------|--------------|--------------------------|------------------------|------------------------------------------------------------------------------------------------------------------------------------------------------------------------------------------------------------------------------------------------------------------|
| Study                                        | Study Design         | Aim                                                                                                                                                               | Country    | Income Level | Start of Data Collection | End of Data Collection | ALF Case Definition                                                                                                                                                                                                                                              |
| Alam et al., 2009 (17)                       | Prospective cohort   | To evaluate the etiology, complications, and outcome of FHF                                                                                                       | Bangladesh | Lower-middle | 3-Nov                    | 8-May                  | Occurrence of hepatic encephalopathy within 8 weeks of onset of jaundice in patients with no previous liver disease and the presence of coagulopathy as proved by a PT > 15 s or INR > 1.5                                                                       |
| Asim et al., 2009 (18)                       | Cross-sectional      | To analyze serum samples from patients with ALF for hepatitis A-G viral markers                                                                                   | India      | Lower-middle | 1-Jun                    | 4-May                  | Patient become deeply jaundiced and went into hepatic encephalopathy within 8 weeks of onset of the disease, with no past history of chronic hepatitis                                                                                                           |
| Bechmann et al., 2014 (19)                   | Retrospective cohort | To identify currently predominant etiologies of ALF at a transplant center                                                                                        | Germany    | High         | 1-Jan                    | 12-Feb                 | <i>Acute Liver Failure Study Group Germany</i> case definition: INR > 1.5 and encephalopathy of any grade. Pre-existing liver disease and systemic cause of liver failure were excluded                                                                          |
| Bhatia et al., 2013 (20)                     | Prospective cohort   | To analyze clinical features, liver function tests, hepatitis viral markers and clinical outcomes in patients with ALF                                            | India      | Lower-middle | Jun-99                   | 1-Jan                  | Development of hepatic encephalopathy within 26 weeks of the first symptoms of acute hepatitis-like illness without any history of underlying liver disease                                                                                                      |
| Borkakoti et al., 2013 (21)                  | Prospective cohort   | To determine the viral load of HEV and its association with the disease severity in patients with ALF in comparison with patients with ALF due to other hepatides | India      | Lower-middle | 6-Jan                    | 11-Dec                 | Development of encephalopathy within 8 weeks of the onset of jaundice without any past history of chronic liver disease; diagnosed as a self-limiting disease and a serum aspartate aminotransferase elevation of at least fivefold or clinical jaundice or both |

|    |                         |                                    |                                                                                                               |             |              |        |        |                                                                                                                                                                  |
|----|-------------------------|------------------------------------|---------------------------------------------------------------------------------------------------------------|-------------|--------------|--------|--------|------------------------------------------------------------------------------------------------------------------------------------------------------------------|
| 1  |                         |                                    |                                                                                                               |             |              |        |        |                                                                                                                                                                  |
| 2  |                         |                                    |                                                                                                               |             |              |        |        |                                                                                                                                                                  |
| 3  |                         |                                    |                                                                                                               |             |              |        |        |                                                                                                                                                                  |
| 4  |                         |                                    |                                                                                                               |             |              |        |        | Onset of coagulopathy and/or                                                                                                                                     |
| 5  |                         |                                    |                                                                                                               |             |              |        |        | encephalopathy $\leq 4$ weeks                                                                                                                                    |
| 6  |                         |                                    |                                                                                                               |             |              |        |        | after the onset of symptoms,                                                                                                                                     |
| 7  | Bravo et al., 2012 (22) | Prospective & retrospective cohort | To investigate the etiology, outcomes and incidence of AHF among children 0-18 years old                      | Philippines | Lower-middle | Jan-00 | 6-Dec  | a prothrombin time $> 2$ , an increased bilirubin and evidence for liver failure complicated by encephalopathy                                                   |
| 11 |                         |                                    |                                                                                                               |             |              |        |        |                                                                                                                                                                  |
| 12 |                         |                                    |                                                                                                               |             |              |        |        |                                                                                                                                                                  |
| 13 |                         |                                    |                                                                                                               |             |              |        |        | <i>Mieli-Vergani</i> case definition:                                                                                                                            |
| 14 |                         |                                    |                                                                                                               |             |              |        |        | a multisystem disorder in                                                                                                                                        |
| 15 |                         |                                    |                                                                                                               |             |              |        |        | which severe impairment of                                                                                                                                       |
| 16 |                         |                                    |                                                                                                               |             |              |        |        | liver function, with or without                                                                                                                                  |
| 17 |                         |                                    |                                                                                                               |             |              |        |        | encephalopathy, occurs in                                                                                                                                        |
| 18 | Cervio et al., 2011 (4) | Retrospective cohort               | To investigate the impact of HAV UI on the trends in the occurrence of FHF in children                        | Argentina   | High         | Mar-93 | 5-Jul  | association with hepatocellular necrosis in a patient with or without recognized underlying chronic liver disease ( <b>Cheeseman &amp; Mieli-Vergani, 2004</b> ) |
| 22 |                         |                                    |                                                                                                               |             |              |        |        |                                                                                                                                                                  |
| 23 |                         |                                    |                                                                                                               |             |              |        |        |                                                                                                                                                                  |
| 24 |                         |                                    |                                                                                                               |             |              |        |        |                                                                                                                                                                  |
| 25 |                         |                                    |                                                                                                               |             |              |        |        |                                                                                                                                                                  |
| 26 | Das et al., 2016 (23)   | Prospective cohort                 | To determine the profile of ALF etiologies                                                                    | India       | Lower-middle | 7-Jan  | 15-Dec | History of development of encephalopathy within 8 weeks of disease onset                                                                                         |
| 27 |                         |                                    |                                                                                                               |             |              |        |        |                                                                                                                                                                  |
| 28 |                         |                                    |                                                                                                               |             |              |        |        |                                                                                                                                                                  |
| 29 |                         |                                    |                                                                                                               |             |              |        |        |                                                                                                                                                                  |
| 30 |                         |                                    |                                                                                                               |             |              |        |        | Elevated ALT levels or AST of                                                                                                                                    |
| 31 |                         |                                    |                                                                                                               |             |              |        |        | at least five-fold with clinical                                                                                                                                 |
| 32 |                         |                                    |                                                                                                               |             |              |        |        | jaundice and without evidence                                                                                                                                    |
| 33 | Gupta et al., 2015 (24) | Retrospective cohort               | To determine the profile of Hepatitis A, B, C and E as a cause of AHF in children in a tertiary care hospital | India       | Lower-middle | 11-Jan | 14-Dec | of chronic liver disease. Patients who had INR $> 1.5$ with encephalopathy or INR $> 2$ without encephalopathy                                                   |
| 34 |                         |                                    |                                                                                                               |             |              |        |        |                                                                                                                                                                  |
| 35 |                         |                                    |                                                                                                               |             |              |        |        |                                                                                                                                                                  |
| 36 |                         |                                    |                                                                                                               |             |              |        |        |                                                                                                                                                                  |
| 37 |                         |                                    |                                                                                                               |             |              |        |        |                                                                                                                                                                  |
| 38 |                         |                                    |                                                                                                               |             |              |        |        |                                                                                                                                                                  |
| 39 |                         |                                    |                                                                                                               |             |              |        |        | International Classification of                                                                                                                                  |
| 40 | Ho et al., 2014 (25)    | Prospective cohort                 | To investigate the incidence, etiology, outcomes, and prognostic factors of ALF                               | Taiwan      | High income  | 5-Jan  | 7-Sep  | Diseases, Ninth Revision, Clinical Modification (ICD-9-CM) code 570.0                                                                                            |
| 41 |                         |                                    |                                                                                                               |             |              |        |        |                                                                                                                                                                  |
| 42 |                         |                                    |                                                                                                               |             |              |        |        |                                                                                                                                                                  |
| 43 |                         |                                    |                                                                                                               |             |              |        |        |                                                                                                                                                                  |
| 44 |                         |                                    |                                                                                                               |             |              |        |        |                                                                                                                                                                  |
| 45 |                         |                                    |                                                                                                               |             |              |        |        | Development of                                                                                                                                                   |
| 46 |                         |                                    |                                                                                                               |             |              |        |        | encephalopathy within 8                                                                                                                                          |
| 47 |                         |                                    |                                                                                                               |             |              |        |        | weeks of the onset of                                                                                                                                            |
| 48 | Latif et al., 2010 (26) | Prospective cohort                 | To identify the risk factors for FHF and their relationship with the outcome in children                      | Pakistan    | Lower-middle | 6-Sep  | 7-Feb  | jaundice having evidence of coagulopathy i.e. PT deranges $> 4$ s of control and deranged liver function i.e. TSB $> 1.5$ mg/dl, AT $> 40$ IU/L                  |
| 49 |                         |                                    |                                                                                                               |             |              |        |        |                                                                                                                                                                  |
| 50 |                         |                                    |                                                                                                               |             |              |        |        |                                                                                                                                                                  |
| 51 |                         |                                    |                                                                                                               |             |              |        |        |                                                                                                                                                                  |
| 52 |                         |                                    |                                                                                                               |             |              |        |        |                                                                                                                                                                  |
| 53 |                         |                                    |                                                                                                               |             |              |        |        |                                                                                                                                                                  |
| 54 |                         |                                    |                                                                                                               |             |              |        |        |                                                                                                                                                                  |
| 55 |                         |                                    |                                                                                                               |             |              |        |        |                                                                                                                                                                  |
| 56 |                         |                                    |                                                                                                               |             |              |        |        |                                                                                                                                                                  |
| 57 |                         |                                    |                                                                                                               |             |              |        |        |                                                                                                                                                                  |
| 58 |                         |                                    |                                                                                                               |             |              |        |        |                                                                                                                                                                  |
| 59 |                         |                                    |                                                                                                               |             |              |        |        |                                                                                                                                                                  |
| 60 |                         |                                    |                                                                                                               |             |              |        |        |                                                                                                                                                                  |

|    |                              |                                                   |                                                                                                                                |            |              |        |        |                                                                                                                                                                                                                        |
|----|------------------------------|---------------------------------------------------|--------------------------------------------------------------------------------------------------------------------------------|------------|--------------|--------|--------|------------------------------------------------------------------------------------------------------------------------------------------------------------------------------------------------------------------------|
| 1  |                              |                                                   |                                                                                                                                |            |              |        |        |                                                                                                                                                                                                                        |
| 2  |                              |                                                   |                                                                                                                                |            |              |        |        |                                                                                                                                                                                                                        |
| 3  |                              |                                                   |                                                                                                                                |            |              |        |        |                                                                                                                                                                                                                        |
| 4  |                              |                                                   |                                                                                                                                |            |              |        |        | Previously healthy patients                                                                                                                                                                                            |
| 5  |                              |                                                   |                                                                                                                                |            |              |        |        | who presented with severe                                                                                                                                                                                              |
| 6  |                              |                                                   |                                                                                                                                |            |              |        |        | impairment of hepato-cellular                                                                                                                                                                                          |
| 7  | Mamun et al., 2009 (27)      | Retrospective cohort                              | To assess the burden of HEV as a cause of ALF                                                                                  | Bangladesh | Lower-middle | 4-Jun  | 6-Dec  | function, i.e. encephalopathy, coagulopathy, and jaundice, within six months of onset of symptoms                                                                                                                      |
| 8  |                              |                                                   |                                                                                                                                |            |              |        |        |                                                                                                                                                                                                                        |
| 9  |                              |                                                   |                                                                                                                                |            |              |        |        |                                                                                                                                                                                                                        |
| 10 |                              |                                                   |                                                                                                                                |            |              |        |        |                                                                                                                                                                                                                        |
| 11 |                              |                                                   |                                                                                                                                |            |              |        |        |                                                                                                                                                                                                                        |
| 12 |                              |                                                   |                                                                                                                                |            |              |        |        | Significant liver dysfunction with pathologically increased laboratory parameters [AST, ALT, AP], an existing coagulopathy in terms of an INR > 1.5, and with the concomitant presence of any degree of encephalopathy |
| 13 | Manka et al., 2015 (28)      | Retrospective cohort                              | To investigate the causes of previously diagnosed indeterminate cases ALF                                                      | Germany    | High         | 6-Nov  | 13-Dec |                                                                                                                                                                                                                        |
| 14 |                              |                                                   |                                                                                                                                |            |              |        |        |                                                                                                                                                                                                                        |
| 15 |                              |                                                   |                                                                                                                                |            |              |        |        |                                                                                                                                                                                                                        |
| 16 |                              |                                                   |                                                                                                                                |            |              |        |        |                                                                                                                                                                                                                        |
| 17 |                              |                                                   |                                                                                                                                |            |              |        |        |                                                                                                                                                                                                                        |
| 18 |                              |                                                   |                                                                                                                                |            |              |        |        |                                                                                                                                                                                                                        |
| 19 |                              |                                                   |                                                                                                                                |            |              |        |        |                                                                                                                                                                                                                        |
| 20 |                              |                                                   |                                                                                                                                |            |              |        |        |                                                                                                                                                                                                                        |
| 21 |                              |                                                   |                                                                                                                                |            |              |        |        |                                                                                                                                                                                                                        |
| 22 |                              |                                                   |                                                                                                                                |            |              |        |        | Presence of coagulopathy [INR > 1.5 or prothrombin index < 50%] and any grade of HE within 26 weeks of the first symptoms without a known underlying liver disease                                                     |
| 23 | Mendizabal et al., 2014 (29) | Retrospective cohort                              | To determine the causes and short-term outcomes of ALF                                                                         | Argentina  | High         | 5-Jun  | 11-Dec |                                                                                                                                                                                                                        |
| 24 |                              |                                                   |                                                                                                                                |            |              |        |        |                                                                                                                                                                                                                        |
| 25 |                              |                                                   |                                                                                                                                |            |              |        |        |                                                                                                                                                                                                                        |
| 26 |                              |                                                   |                                                                                                                                |            |              |        |        |                                                                                                                                                                                                                        |
| 27 |                              |                                                   |                                                                                                                                |            |              |        |        |                                                                                                                                                                                                                        |
| 28 |                              |                                                   |                                                                                                                                |            |              |        |        |                                                                                                                                                                                                                        |
| 29 |                              |                                                   |                                                                                                                                |            |              |        |        |                                                                                                                                                                                                                        |
| 30 |                              |                                                   |                                                                                                                                |            |              |        |        | Any evidence of coagulation abnormality, generally INR >1.5 and any degree of mental alteration (encephalopathy) without pre-existing cirrhosis and with an illness of < 4 weeks duration                              |
| 31 | Mishra et al., 2016 (30)     | Retrospective cohort                              | To assess the relative efficacy of HEV antigen detection by ELISA in patients with ALF                                         | India      | Lower-middle | 13-Nov | 15-Jan |                                                                                                                                                                                                                        |
| 32 |                              |                                                   |                                                                                                                                |            |              |        |        |                                                                                                                                                                                                                        |
| 33 |                              |                                                   |                                                                                                                                |            |              |        |        |                                                                                                                                                                                                                        |
| 34 |                              |                                                   |                                                                                                                                |            |              |        |        |                                                                                                                                                                                                                        |
| 35 |                              |                                                   |                                                                                                                                |            |              |        |        |                                                                                                                                                                                                                        |
| 36 |                              |                                                   |                                                                                                                                |            |              |        |        |                                                                                                                                                                                                                        |
| 37 |                              |                                                   |                                                                                                                                |            |              |        |        |                                                                                                                                                                                                                        |
| 38 |                              |                                                   |                                                                                                                                |            |              |        |        |                                                                                                                                                                                                                        |
| 39 |                              |                                                   |                                                                                                                                |            |              |        |        |                                                                                                                                                                                                                        |
| 40 | Mumtaz et al., 2009 (31)     | Prospective cohort compared to historical control | To assess the etiology, prothrombin time (PT), alanine aminotransferase, creatinine, albumin for non-acetaminophen-induced ALF | Pakistan   | Lower middle | Jan-00 | 7-Mar  | Rapid development of acute liver injury with impaired synthetic function and encephalopathy in a person who previously had a normal liver                                                                              |
| 41 |                              |                                                   |                                                                                                                                |            |              |        |        |                                                                                                                                                                                                                        |
| 42 |                              |                                                   |                                                                                                                                |            |              |        |        |                                                                                                                                                                                                                        |
| 43 |                              |                                                   |                                                                                                                                |            |              |        |        |                                                                                                                                                                                                                        |
| 44 |                              |                                                   |                                                                                                                                |            |              |        |        |                                                                                                                                                                                                                        |
| 45 |                              |                                                   |                                                                                                                                |            |              |        |        |                                                                                                                                                                                                                        |
| 46 |                              |                                                   |                                                                                                                                |            |              |        |        |                                                                                                                                                                                                                        |
| 47 |                              |                                                   |                                                                                                                                |            |              |        |        |                                                                                                                                                                                                                        |
| 48 |                              |                                                   |                                                                                                                                |            |              |        |        |                                                                                                                                                                                                                        |
| 49 |                              |                                                   |                                                                                                                                |            |              |        |        | Onset of encephalopathy $\leq$ 28 days after the onset of symptoms with INR > 2 and increased bilirubin complicated by encephalopathy in patients                                                                      |
| 50 | Pandit et al., 2015 (32)     | Retrospective cohort                              | To assess the frequency of hepatotropic viruses as etiological agents of ALF                                                   | India      | Lower-middle | 3-Jan  | 5-Dec  |                                                                                                                                                                                                                        |
| 51 |                              |                                                   |                                                                                                                                |            |              |        |        |                                                                                                                                                                                                                        |
| 52 |                              |                                                   |                                                                                                                                |            |              |        |        |                                                                                                                                                                                                                        |
| 53 |                              |                                                   |                                                                                                                                |            |              |        |        |                                                                                                                                                                                                                        |
| 54 |                              |                                                   |                                                                                                                                |            |              |        |        |                                                                                                                                                                                                                        |
| 55 |                              |                                                   |                                                                                                                                |            |              |        |        |                                                                                                                                                                                                                        |
| 56 |                              |                                                   |                                                                                                                                |            |              |        |        |                                                                                                                                                                                                                        |
| 57 |                              |                                                   |                                                                                                                                |            |              |        |        |                                                                                                                                                                                                                        |
| 58 |                              |                                                   |                                                                                                                                |            |              |        |        |                                                                                                                                                                                                                        |
| 59 |                              |                                                   |                                                                                                                                |            |              |        |        |                                                                                                                                                                                                                        |
| 60 |                              |                                                   |                                                                                                                                |            |              |        |        |                                                                                                                                                                                                                        |

|                               |                                         |                                                                                           |               |              |        |        |                                                                                                                                                                                                                                                                                                                                   |
|-------------------------------|-----------------------------------------|-------------------------------------------------------------------------------------------|---------------|--------------|--------|--------|-----------------------------------------------------------------------------------------------------------------------------------------------------------------------------------------------------------------------------------------------------------------------------------------------------------------------------------|
|                               |                                         |                                                                                           |               |              |        |        | without a previous history of liver disease                                                                                                                                                                                                                                                                                       |
| Poovorawan (33) et al., 2013  | Prospective cohort                      | To determine the causes and outcomes of Thai children with AHF                            | Thailand      | Upper-middle | 2-Jan  | 5-Sep  | <i>International Association for the Study of the Liver</i> case definition: <b>(Tandon et al, 1999)</b>                                                                                                                                                                                                                          |
| Schwarz et al., 2014 (34)     | Retrospective cohort - Patient registry | To analyzed results of viral testing among non-acetaminophen ALF study participants       | USA/Canada/UK | High         | Dec-99 | 12-Dec | No known evidence of chronic liver disease, with evidence of acute liver injury, and hepatic-based coagulopathy not corrected by vitamin K with the follow parameters: PT $\geq$ 15 s or INR $\geq$ 1.5 in the presence of clinical HE or a PT $\geq$ 20 s or INR $\geq$ 2.0 regardless of the presence or absence of clinical HE |
| Shalimar et al., 2017 (35)    | Retrospective cohort                    | To assess the differences in the course of HEV-ALF as compared to other etiologies of ALF | India         | Lower middle | Jan-86 | 15-Dec | <i>International Association for the Study of Liver</i> (IASL) case definition: Occurrence of encephalopathy within 4 weeks from the onset of symptoms in the absence of preexisting liver disease                                                                                                                                |
| Silverio et al., 2015 (36)    | Retrospective cohort                    | To describe the clinical features of children treated for ALF                             | Cuba          | Upper-middle | 5-Jan  | 11-Dec | Evidence of liver damage in the absence of prior known chronic liver disease; altered coagulation, expressed as PT $>$ 15 s with encephalopathy; or PT $>$ 20 s with or without encephalopathy—all this within eight weeks of onset of clinical symptoms                                                                          |
| Somasekar et al., 2017 (37)   | Retrospective cohort                    | To investigate the causes of previously diagnosed indeterminate cases ALF                 | United States | High         | Jan-98 | 10-Dec | <i>United States Acute Liver Failure Study Group</i> case definition                                                                                                                                                                                                                                                              |
| Uddin Jamro et al., 2013 (38) | Retrospective cohort                    | To study the etiology, outcome and risk factors for FHF in children at                    | Pakistan      | Lower-middle | 7-Jul  | 12-Jun | Presence of acute liver failure (coagulopathy PT $>$ 20 s or INR $>$ 2), HE without pre-existing liver disease, within 8                                                                                                                                                                                                          |

|                                                                                                                                                                                                                                                                                                                                                                                                                                                                                                                                            |                      |                                                                                                                                   |       |        |       |        |  |                                                                                                                                                                                         |
|--------------------------------------------------------------------------------------------------------------------------------------------------------------------------------------------------------------------------------------------------------------------------------------------------------------------------------------------------------------------------------------------------------------------------------------------------------------------------------------------------------------------------------------------|----------------------|-----------------------------------------------------------------------------------------------------------------------------------|-------|--------|-------|--------|--|-----------------------------------------------------------------------------------------------------------------------------------------------------------------------------------------|
|                                                                                                                                                                                                                                                                                                                                                                                                                                                                                                                                            |                      | a tertiary care hospital                                                                                                          |       |        |       |        |  | weeks of the onset of clinical liver disease                                                                                                                                            |
| Tsunoda et al., 2017 (39)                                                                                                                                                                                                                                                                                                                                                                                                                                                                                                                  | Prospective cohort   | To identify the roles of CMV, EBV and HHV in immunocompetent children with acute liver failure not resulting from hepatitis virus | Japan | High   | 7-Jan | 13-Dec |  | Liver dysfunction with elevated AST and ALT > 30 IU/L                                                                                                                                   |
| Zhao et al., 2014 (40)                                                                                                                                                                                                                                                                                                                                                                                                                                                                                                                     | Retrospective cohort | To investigate etiologies and outcomes of children with ALF                                                                       | China | Middle | 7-Jan | 12-Dec |  | Coagulopathy [PTA $\leq$ 40% or INR $\geq$ 1.5 excluding hematologic diseases] and jaundice [Tbil $\geq$ 171 $\mu$ mol/L] within 4 weeks in a child without pre-existing liver diseases |
| <p><b>Abbreviations:</b> ALF = acute liver failure; FHF = fulminant hepatic failure; AHF = acute hepatic failure; HEV = hepatitis E virus; CMV = cytomegalovirus; EBV = Epstein Barr virus; HHV = human herpesvirus; ELISA = enzyme-linked immunosorbent assay; INR = international normalized ratio; PT = prothrombin time; s = second; TSB = total serum bilirubin; HE = hepatic encephalopathy; AST = aspartate aminotransferase; ALT = alanine aminotransferase; AP = alkaline phosphatase; PTA = plasma thromboplastin antecedent</p> |                      |                                                                                                                                   |       |        |       |        |  |                                                                                                                                                                                         |

Figure 1: Flow diagram for selection of studies

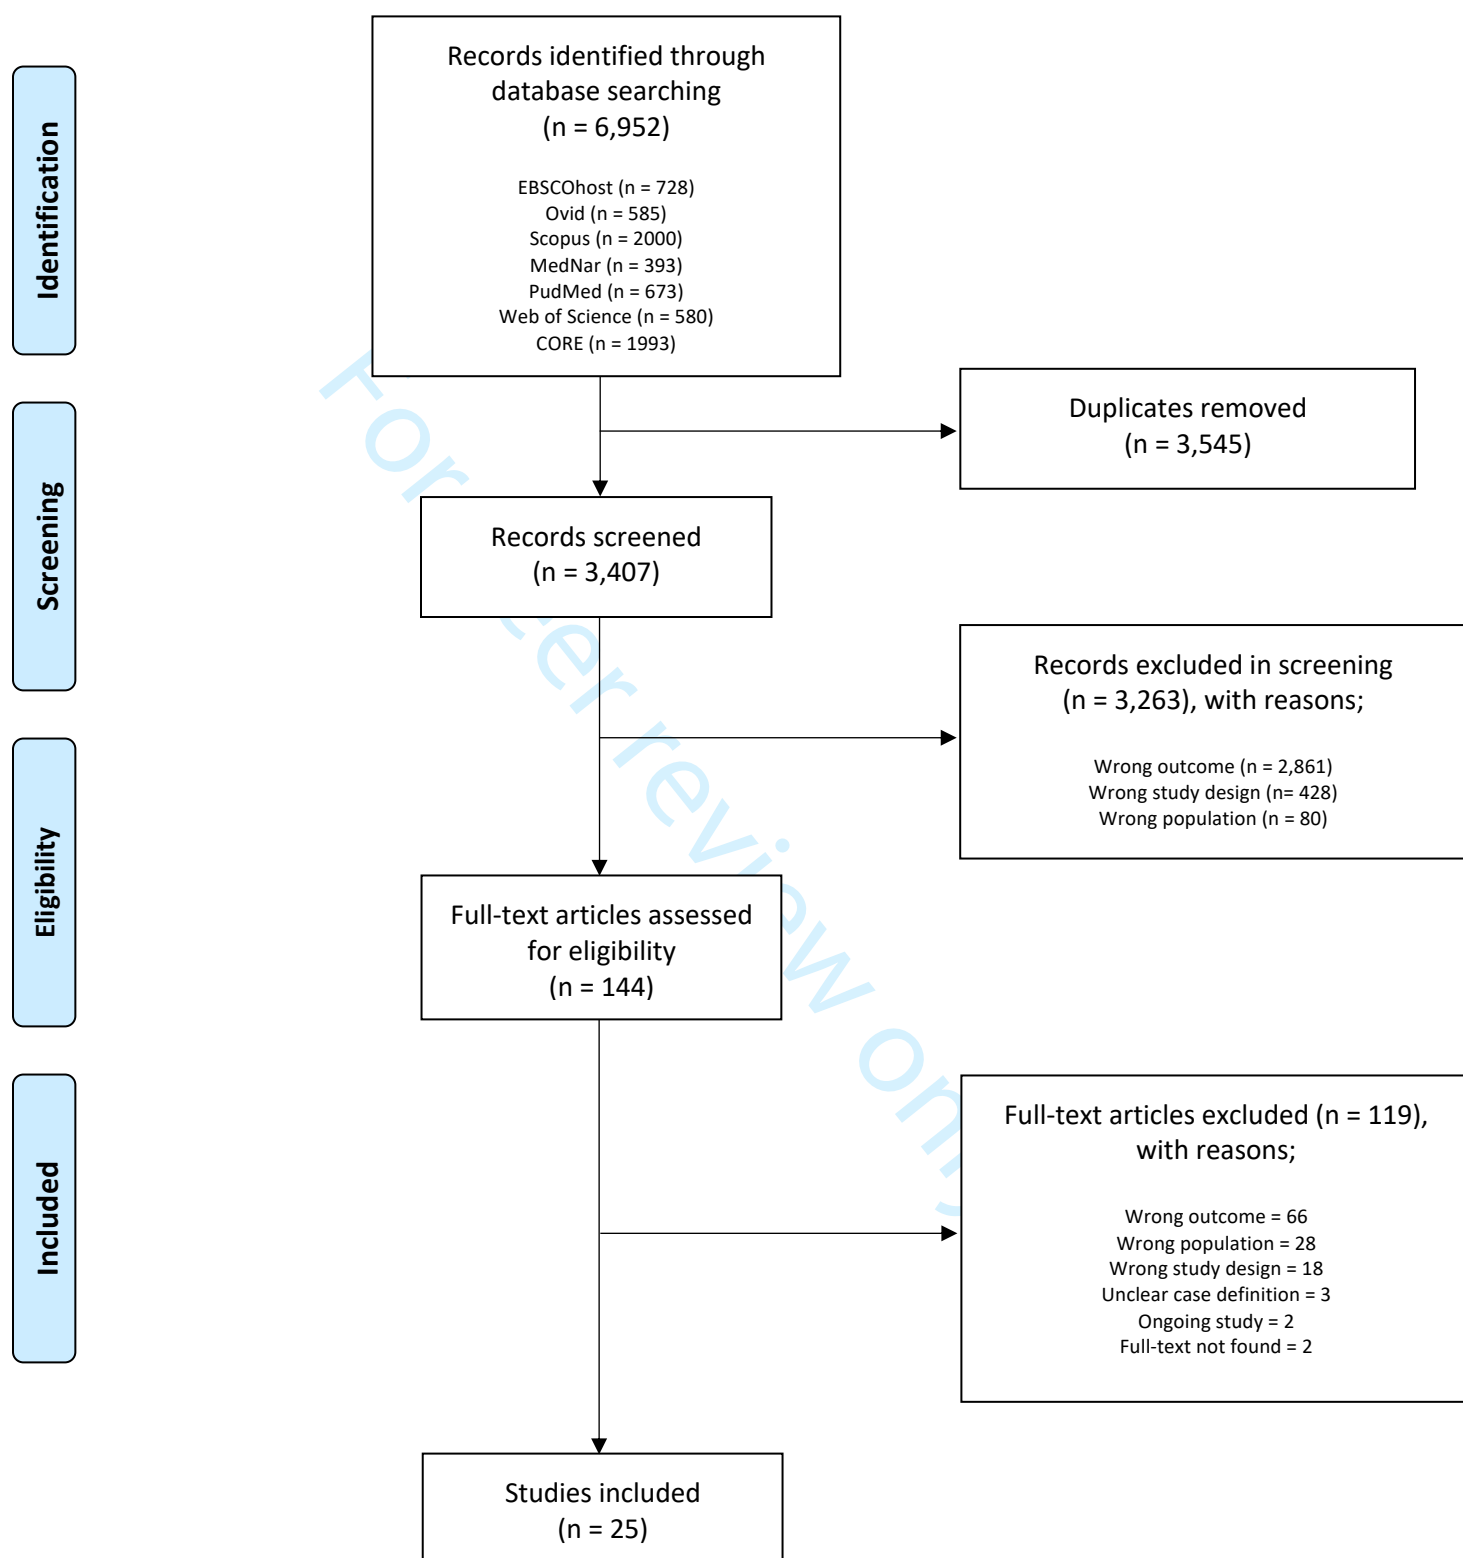

Figure 2: Prevalence of HAV-induced ALF by country HAV immunization status

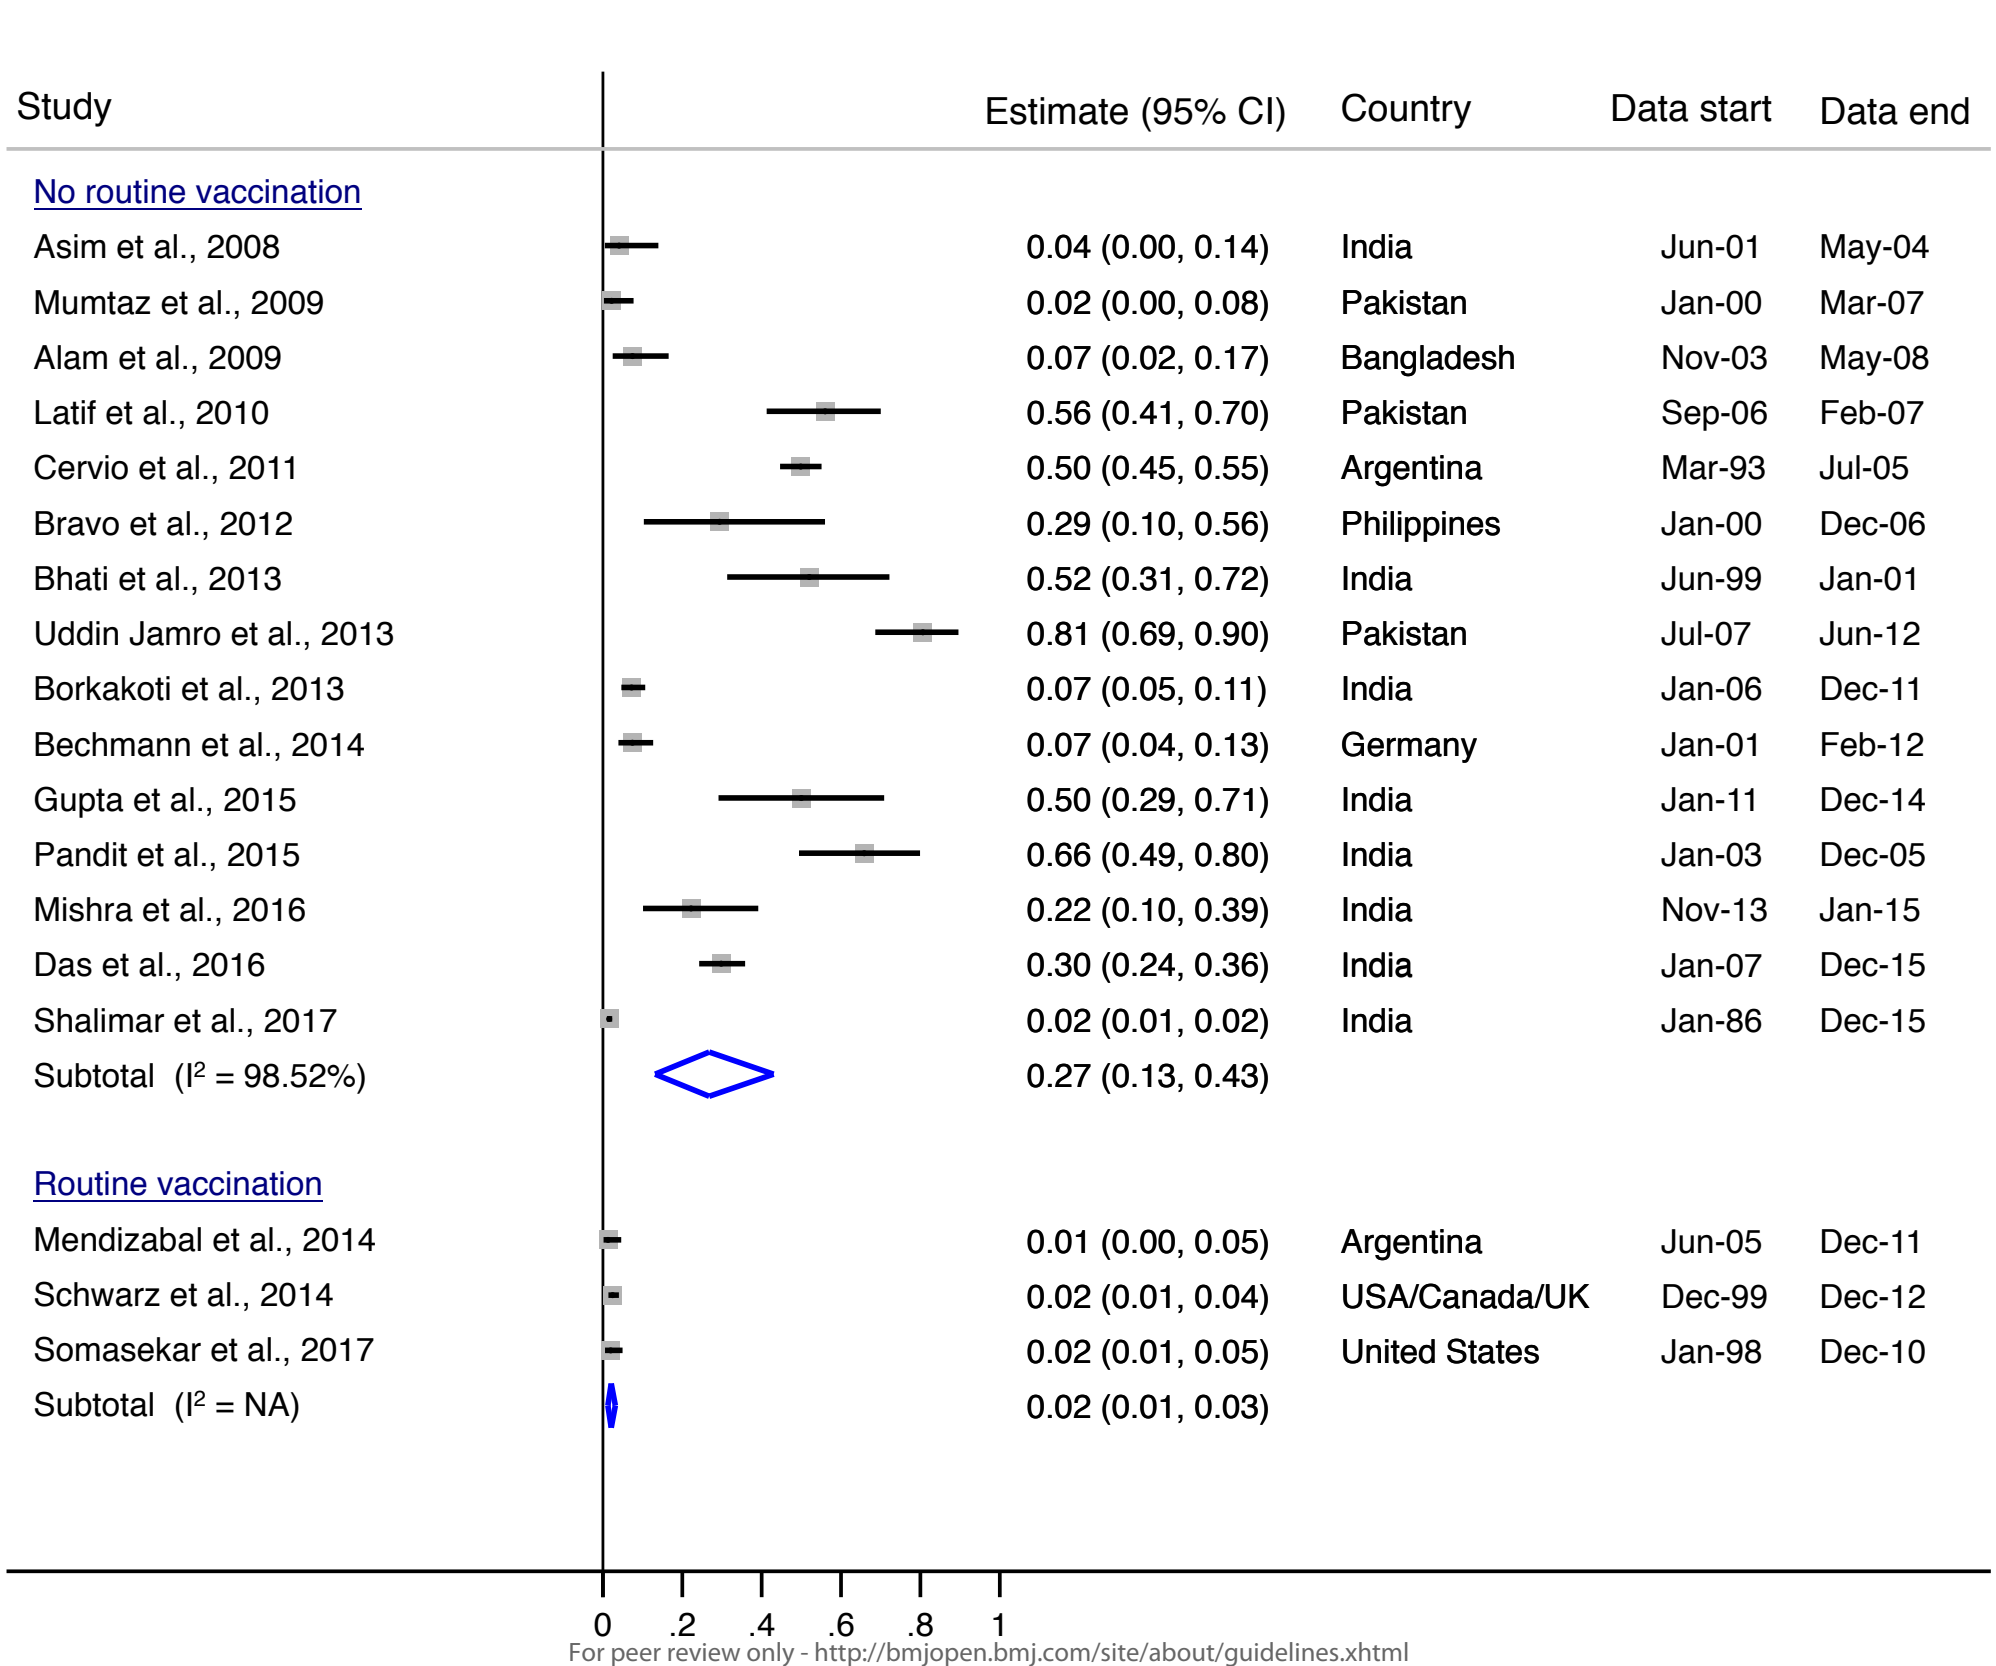

Figure 3: Prevalence of HBV-induced ALF by country HBV immunization status

1  
2  
3  
4  
5  
6  
7  
8  
9  
10  
11  
12  
13  
14  
15  
16  
17  
18  
19  
20  
21  
22  
23  
24  
25  
26  
27  
28  
29  
30  
31  
32  
33  
34  
35  
36  
37  
38  
39  
40  
41  
42  
43  
44  
45  
46  
47  
48  
49  
50  
51  
52  
53  
54  
55  
56

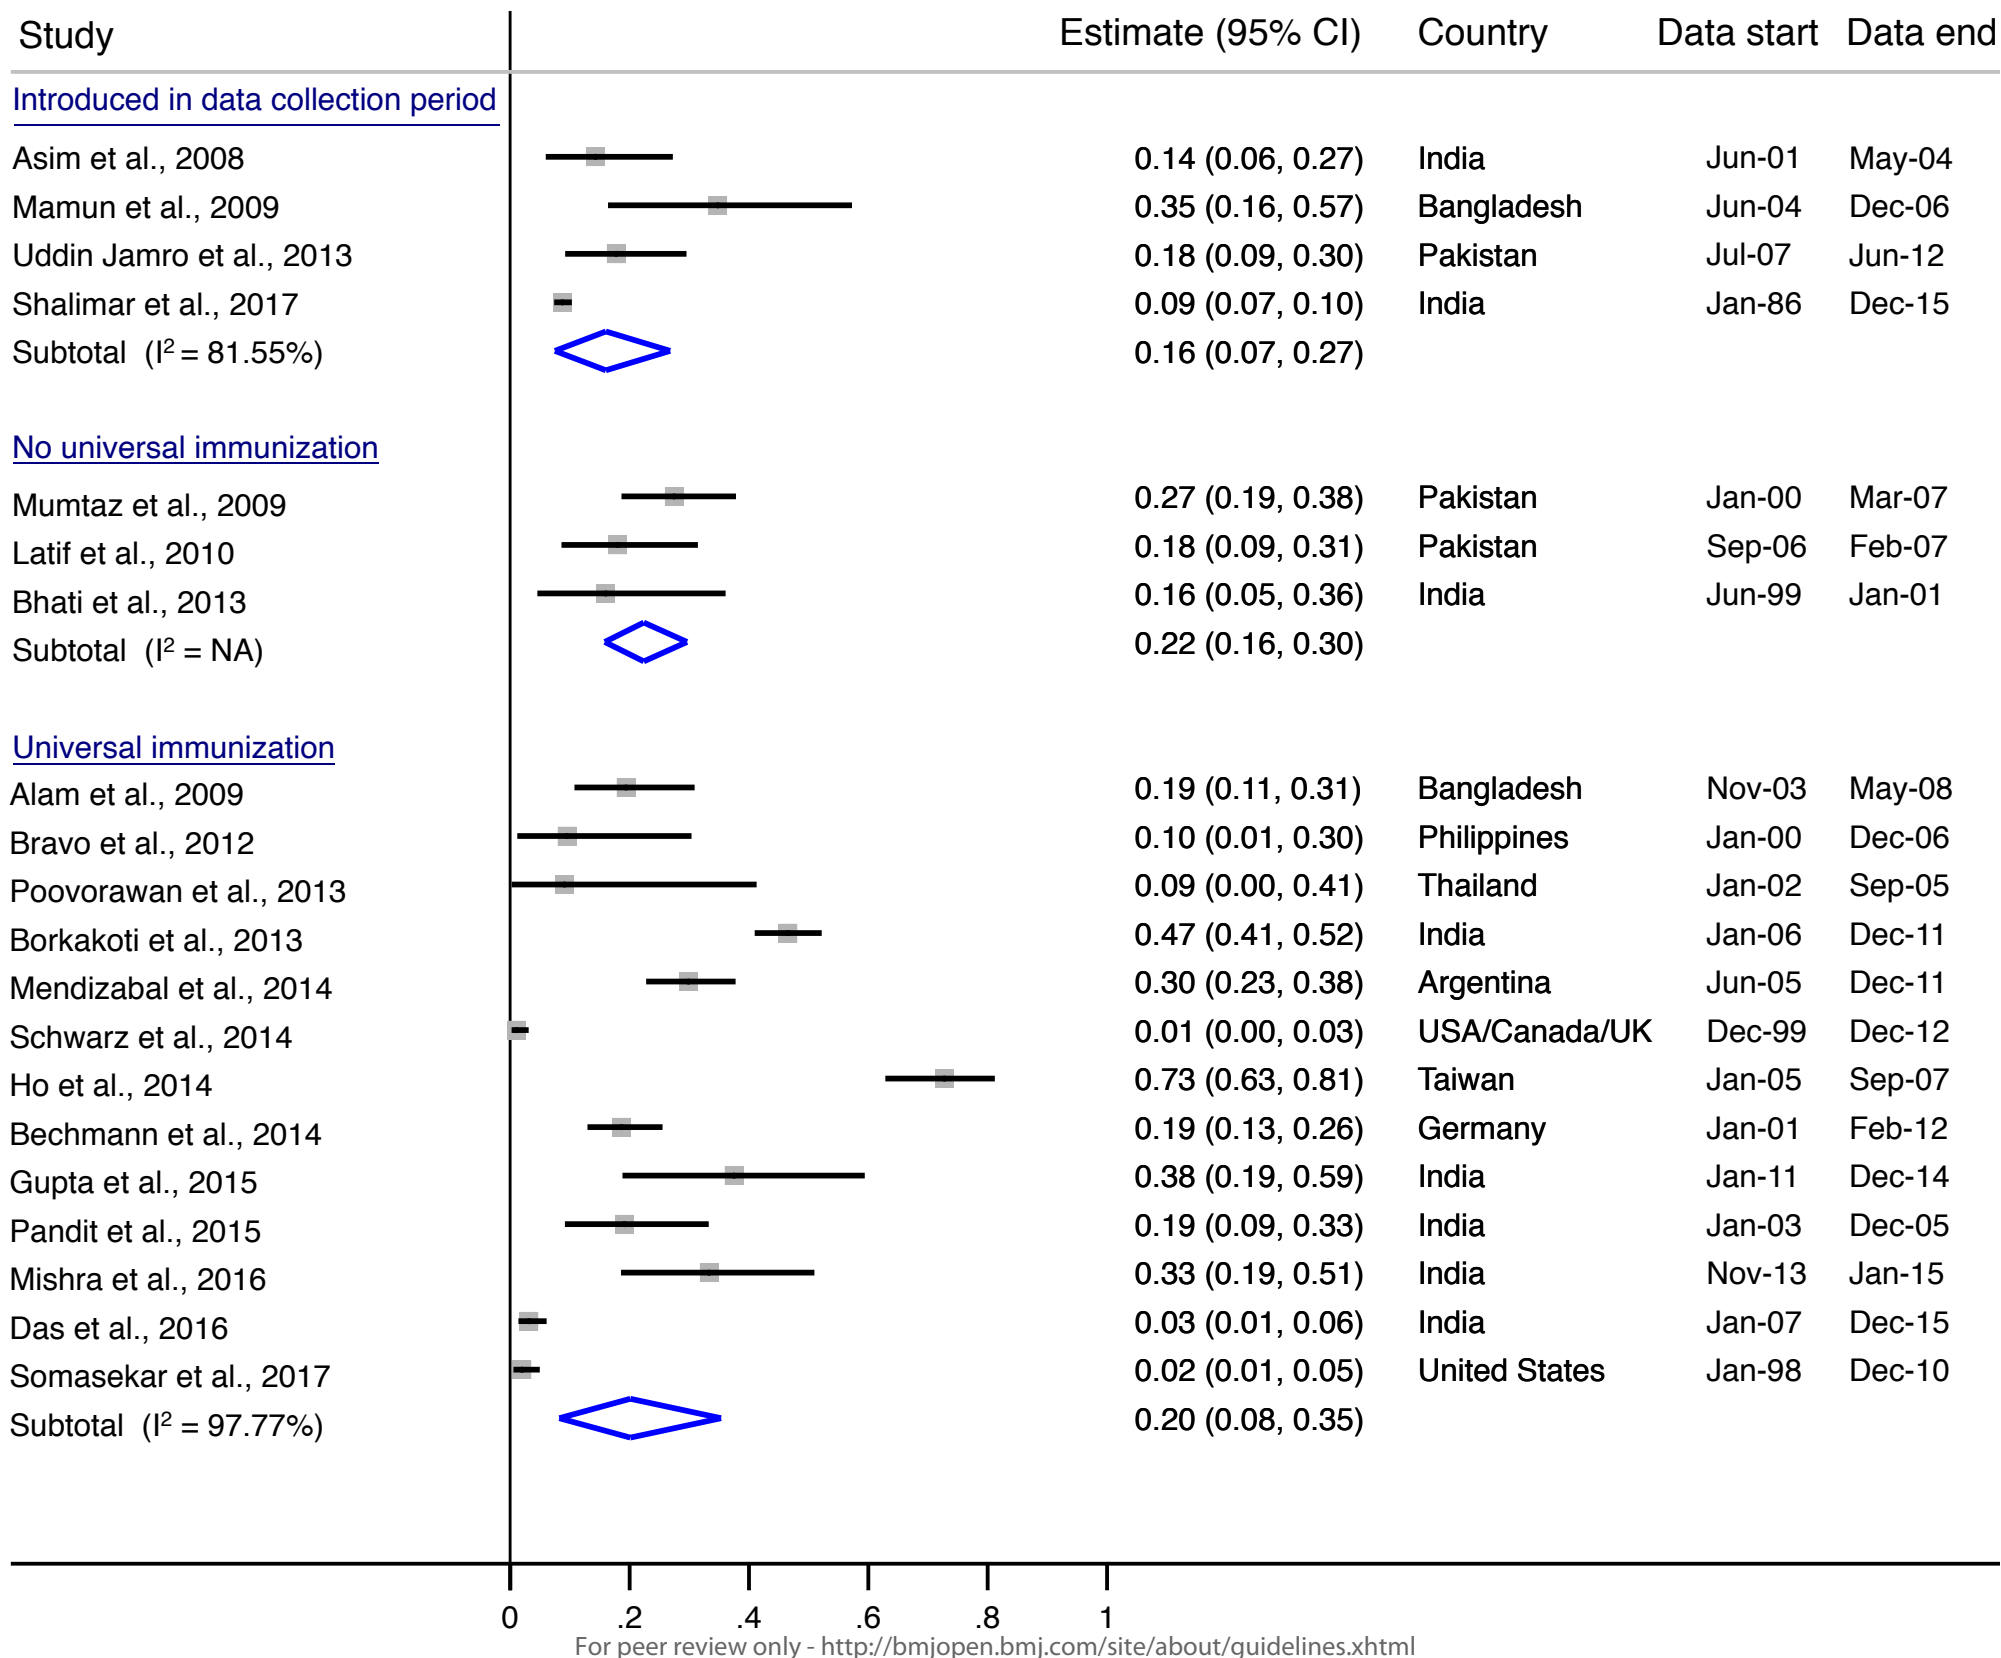



Figure 4: Prevalence of outcomes associated with viral-induced ALF

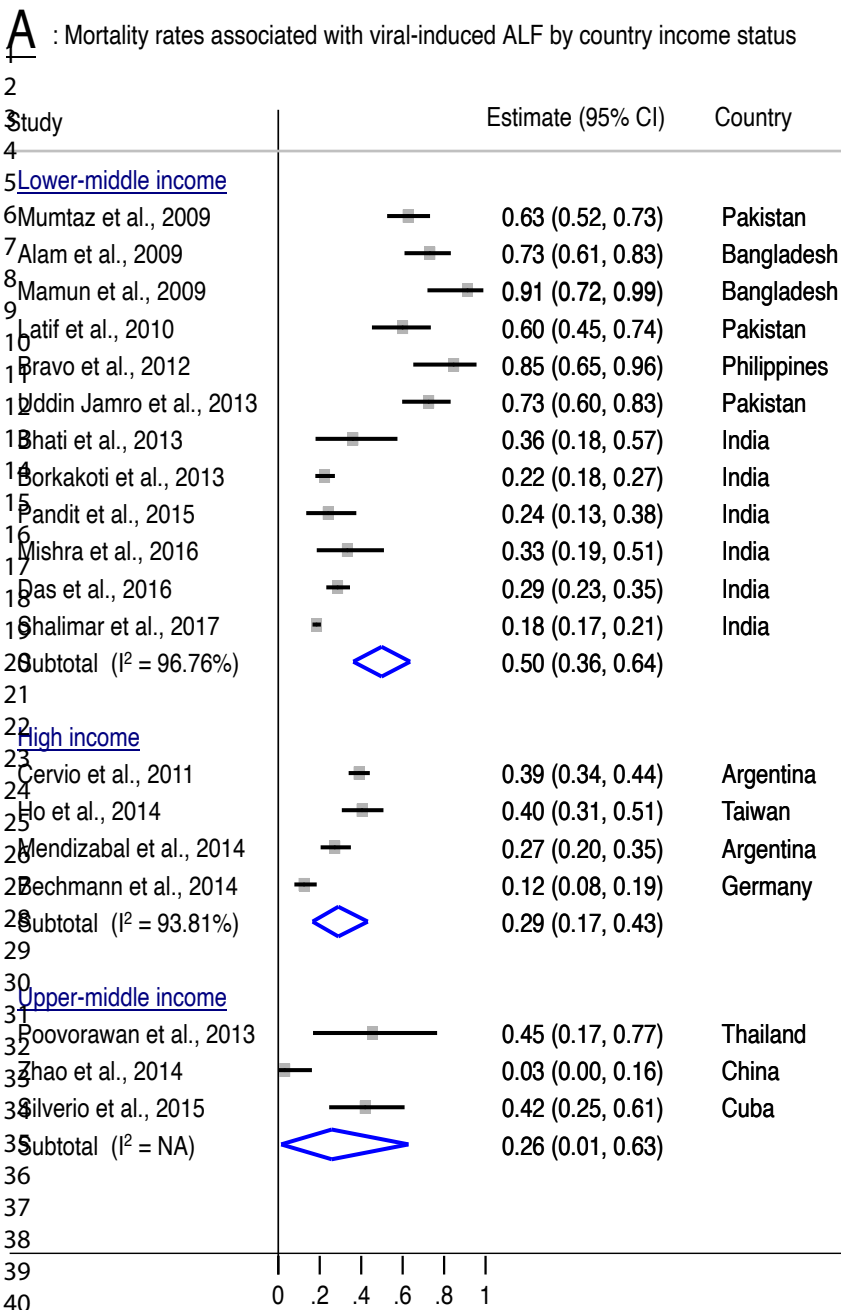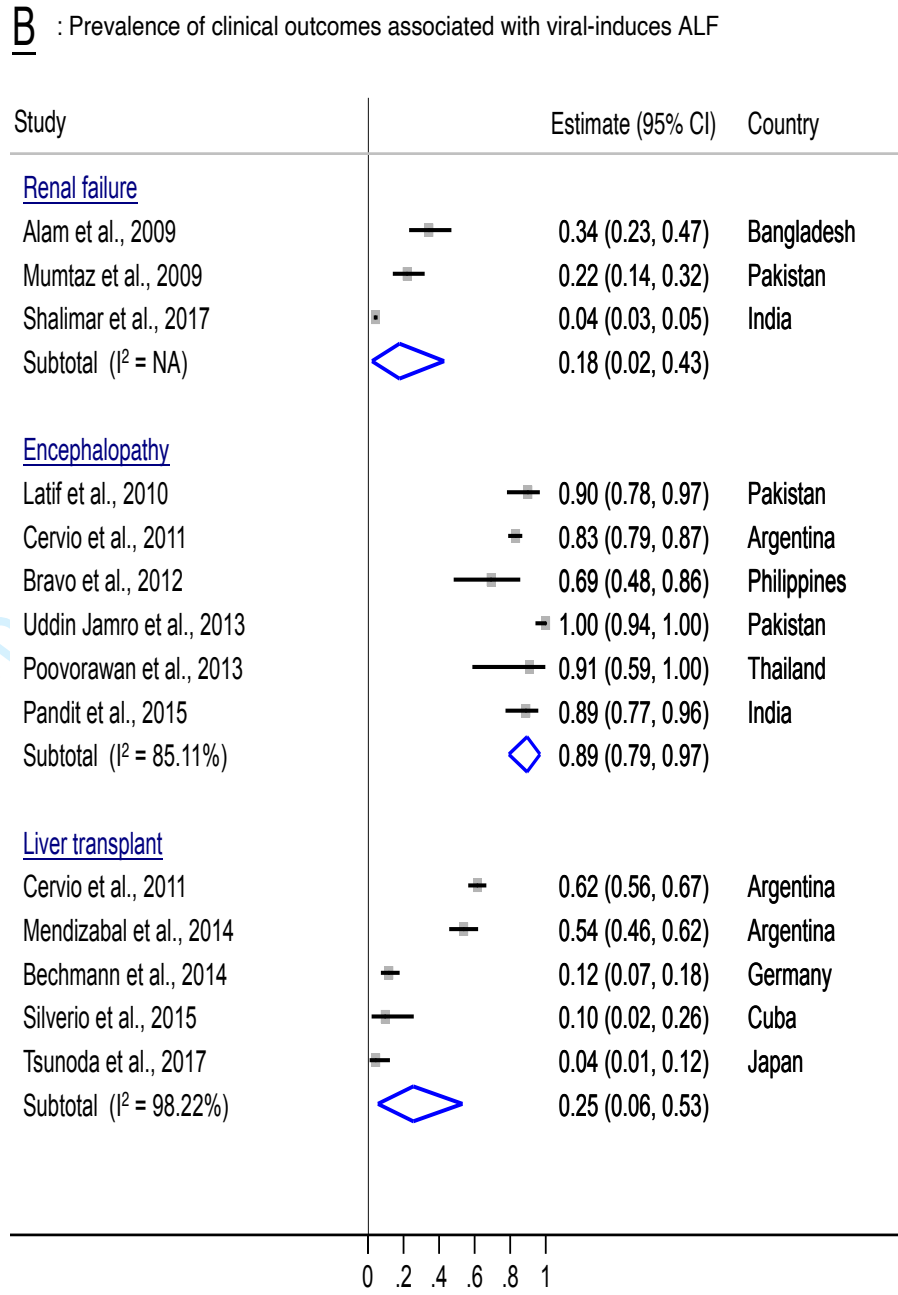

# Supplementary Figure 1: Prevalence of HCV-induced ALF

1  
2  
3  
4  
5  
6  
7  
8  
9  
10  
11  
12  
13  
14  
15  
16  
17  
18  
19  
20  
21  
22  
23  
24  
25  
26  
27  
28  
29  
30  
31  
32  
33  
34  
35  
36  
37  
38

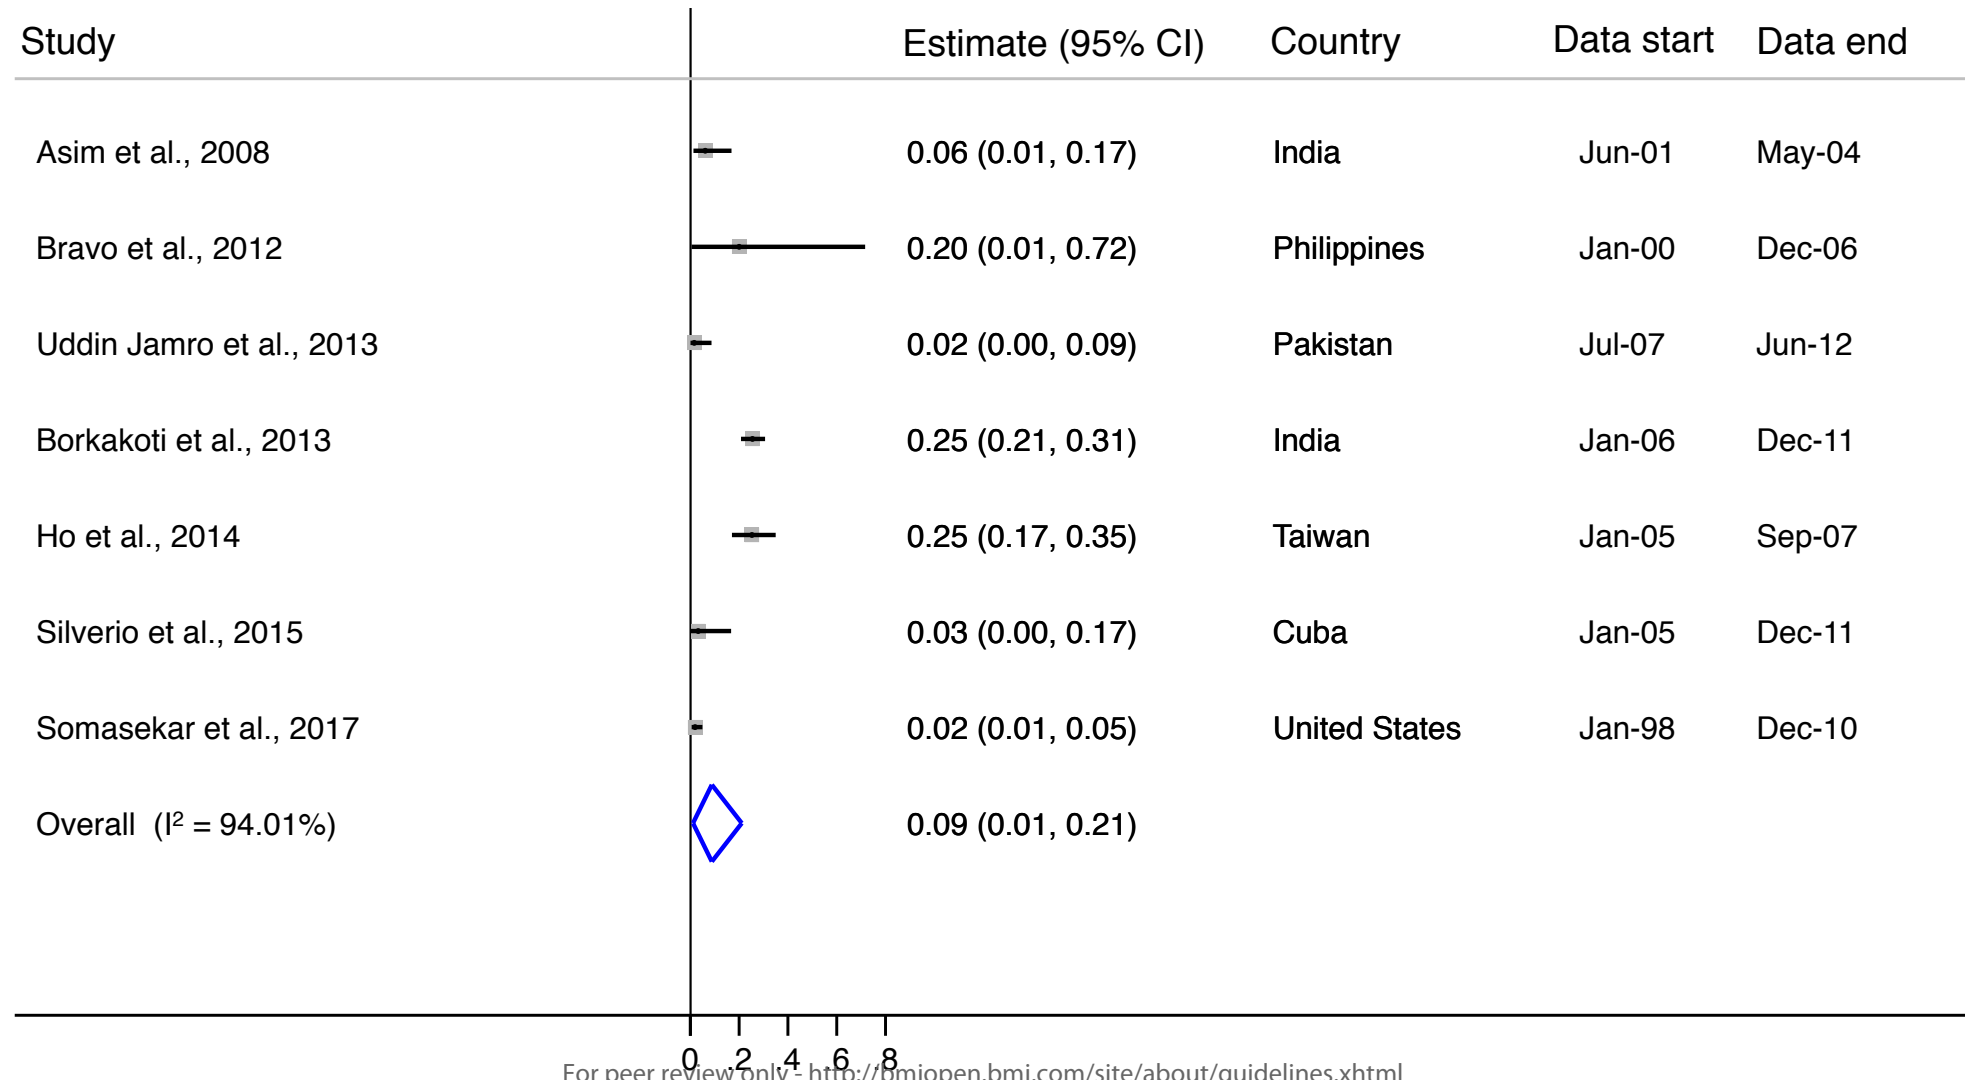

For peer review only - <http://bmjopen.bmj.com/site/about/guidelines.xhtml>

Abbreviations: HCV = hepatitis C virus, ALF = acute liver failure, CI = confidence interval, I<sup>2</sup> = heterogeneity statistic

# Supplementary Figure 2: Prevalence of HEV-induced ALF

1  
2  
3  
4  
5  
6  
7  
8  
9  
10  
11  
12  
13  
14  
15  
16  
17  
18  
19  
20  
21  
22  
23  
24  
25  
26  
27  
28  
29  
30  
31  
32  
33  
34  
35  
36  
37  
38  
39  
40  
41  
42

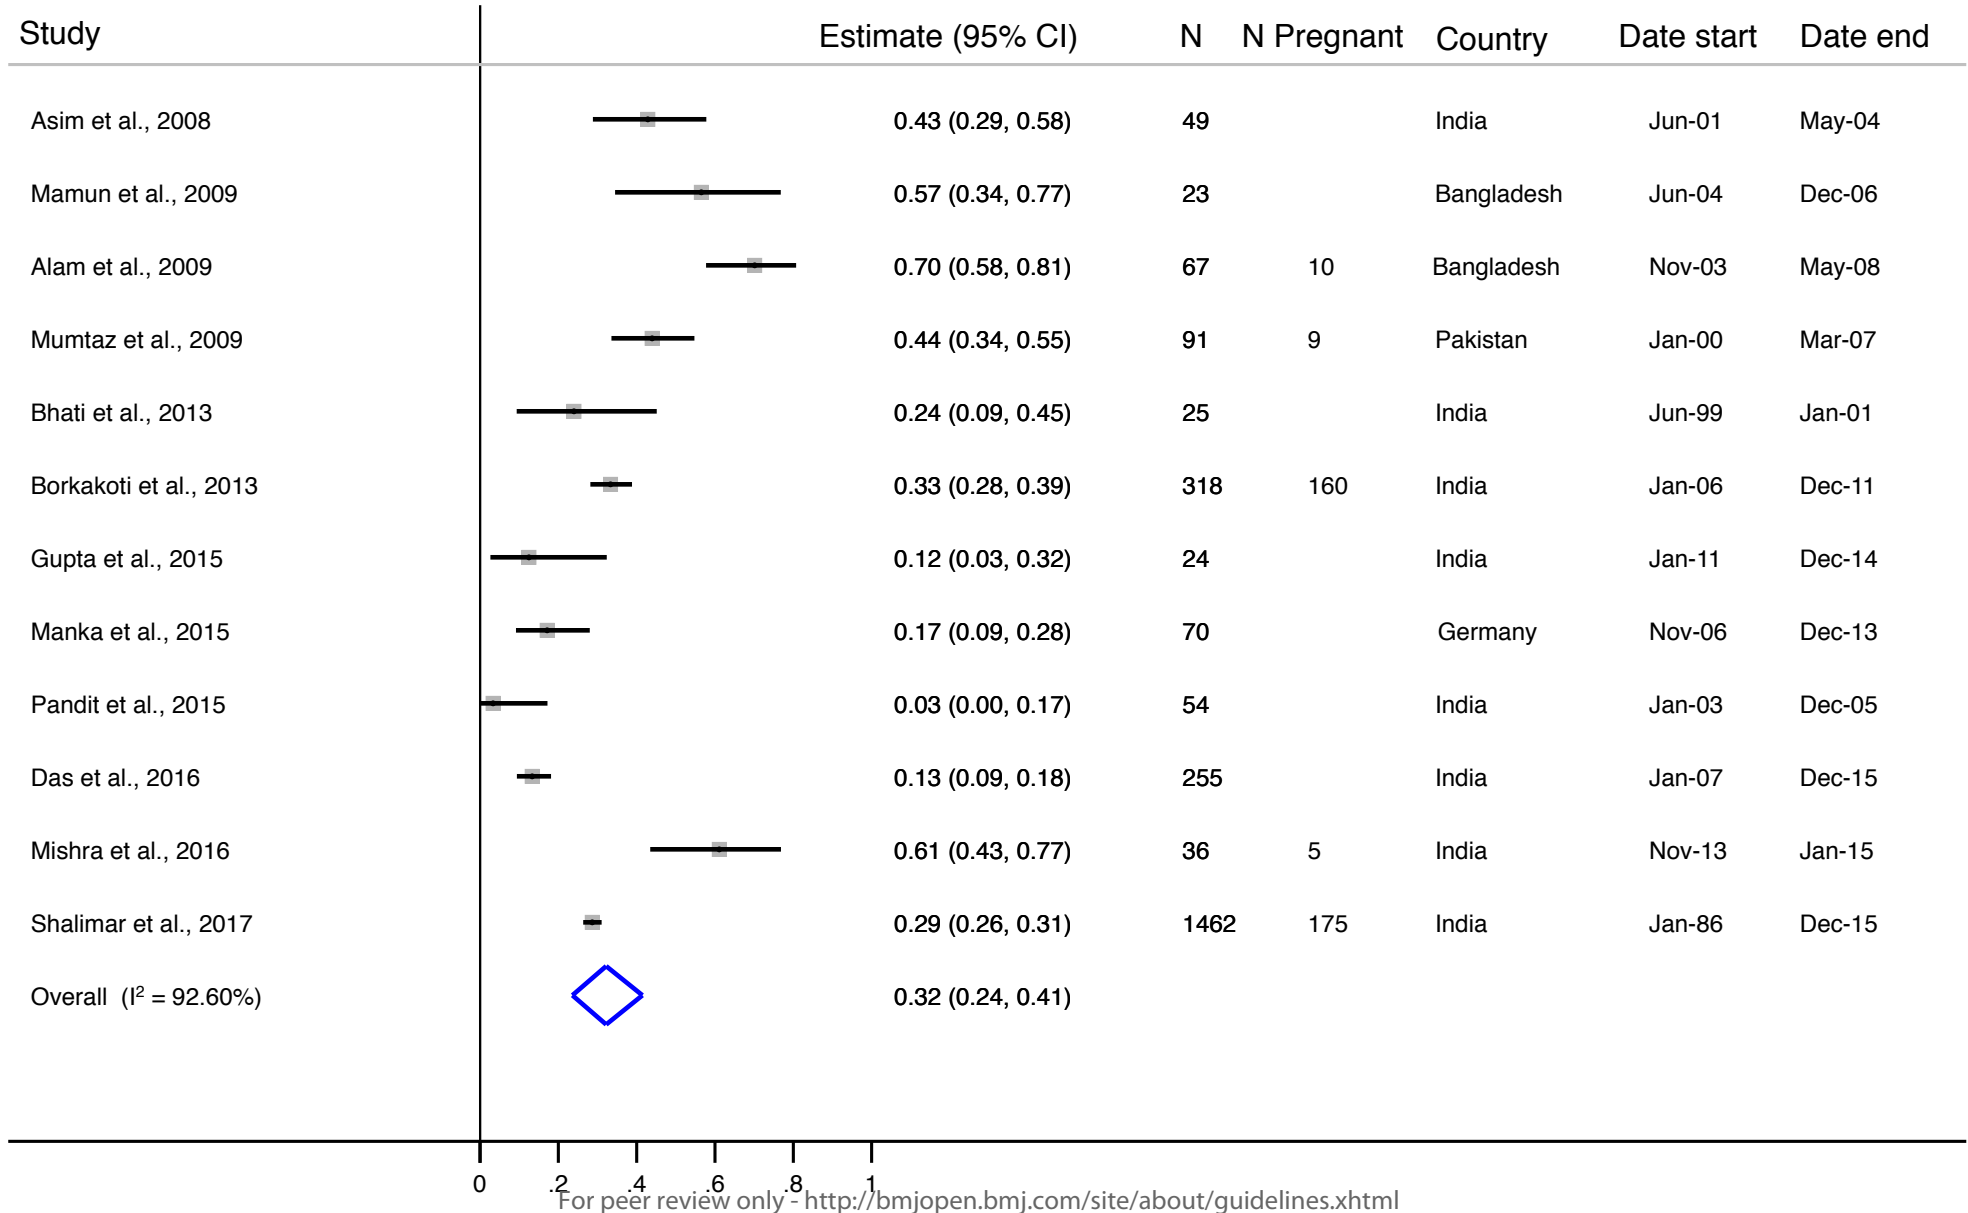

For peer review only - <http://bmjopen.bmj.com/site/about/guidelines.xhtml>

Abbreviations: HEV = hepatitis E virus, ALF = acute liver failure, CI = confidence interval, I<sup>2</sup> = heterogeneity statistic

# Supplementary Figure 3: Prevalence of HDV-, HHV/HSV-, CMV- and EBV-induced AFL

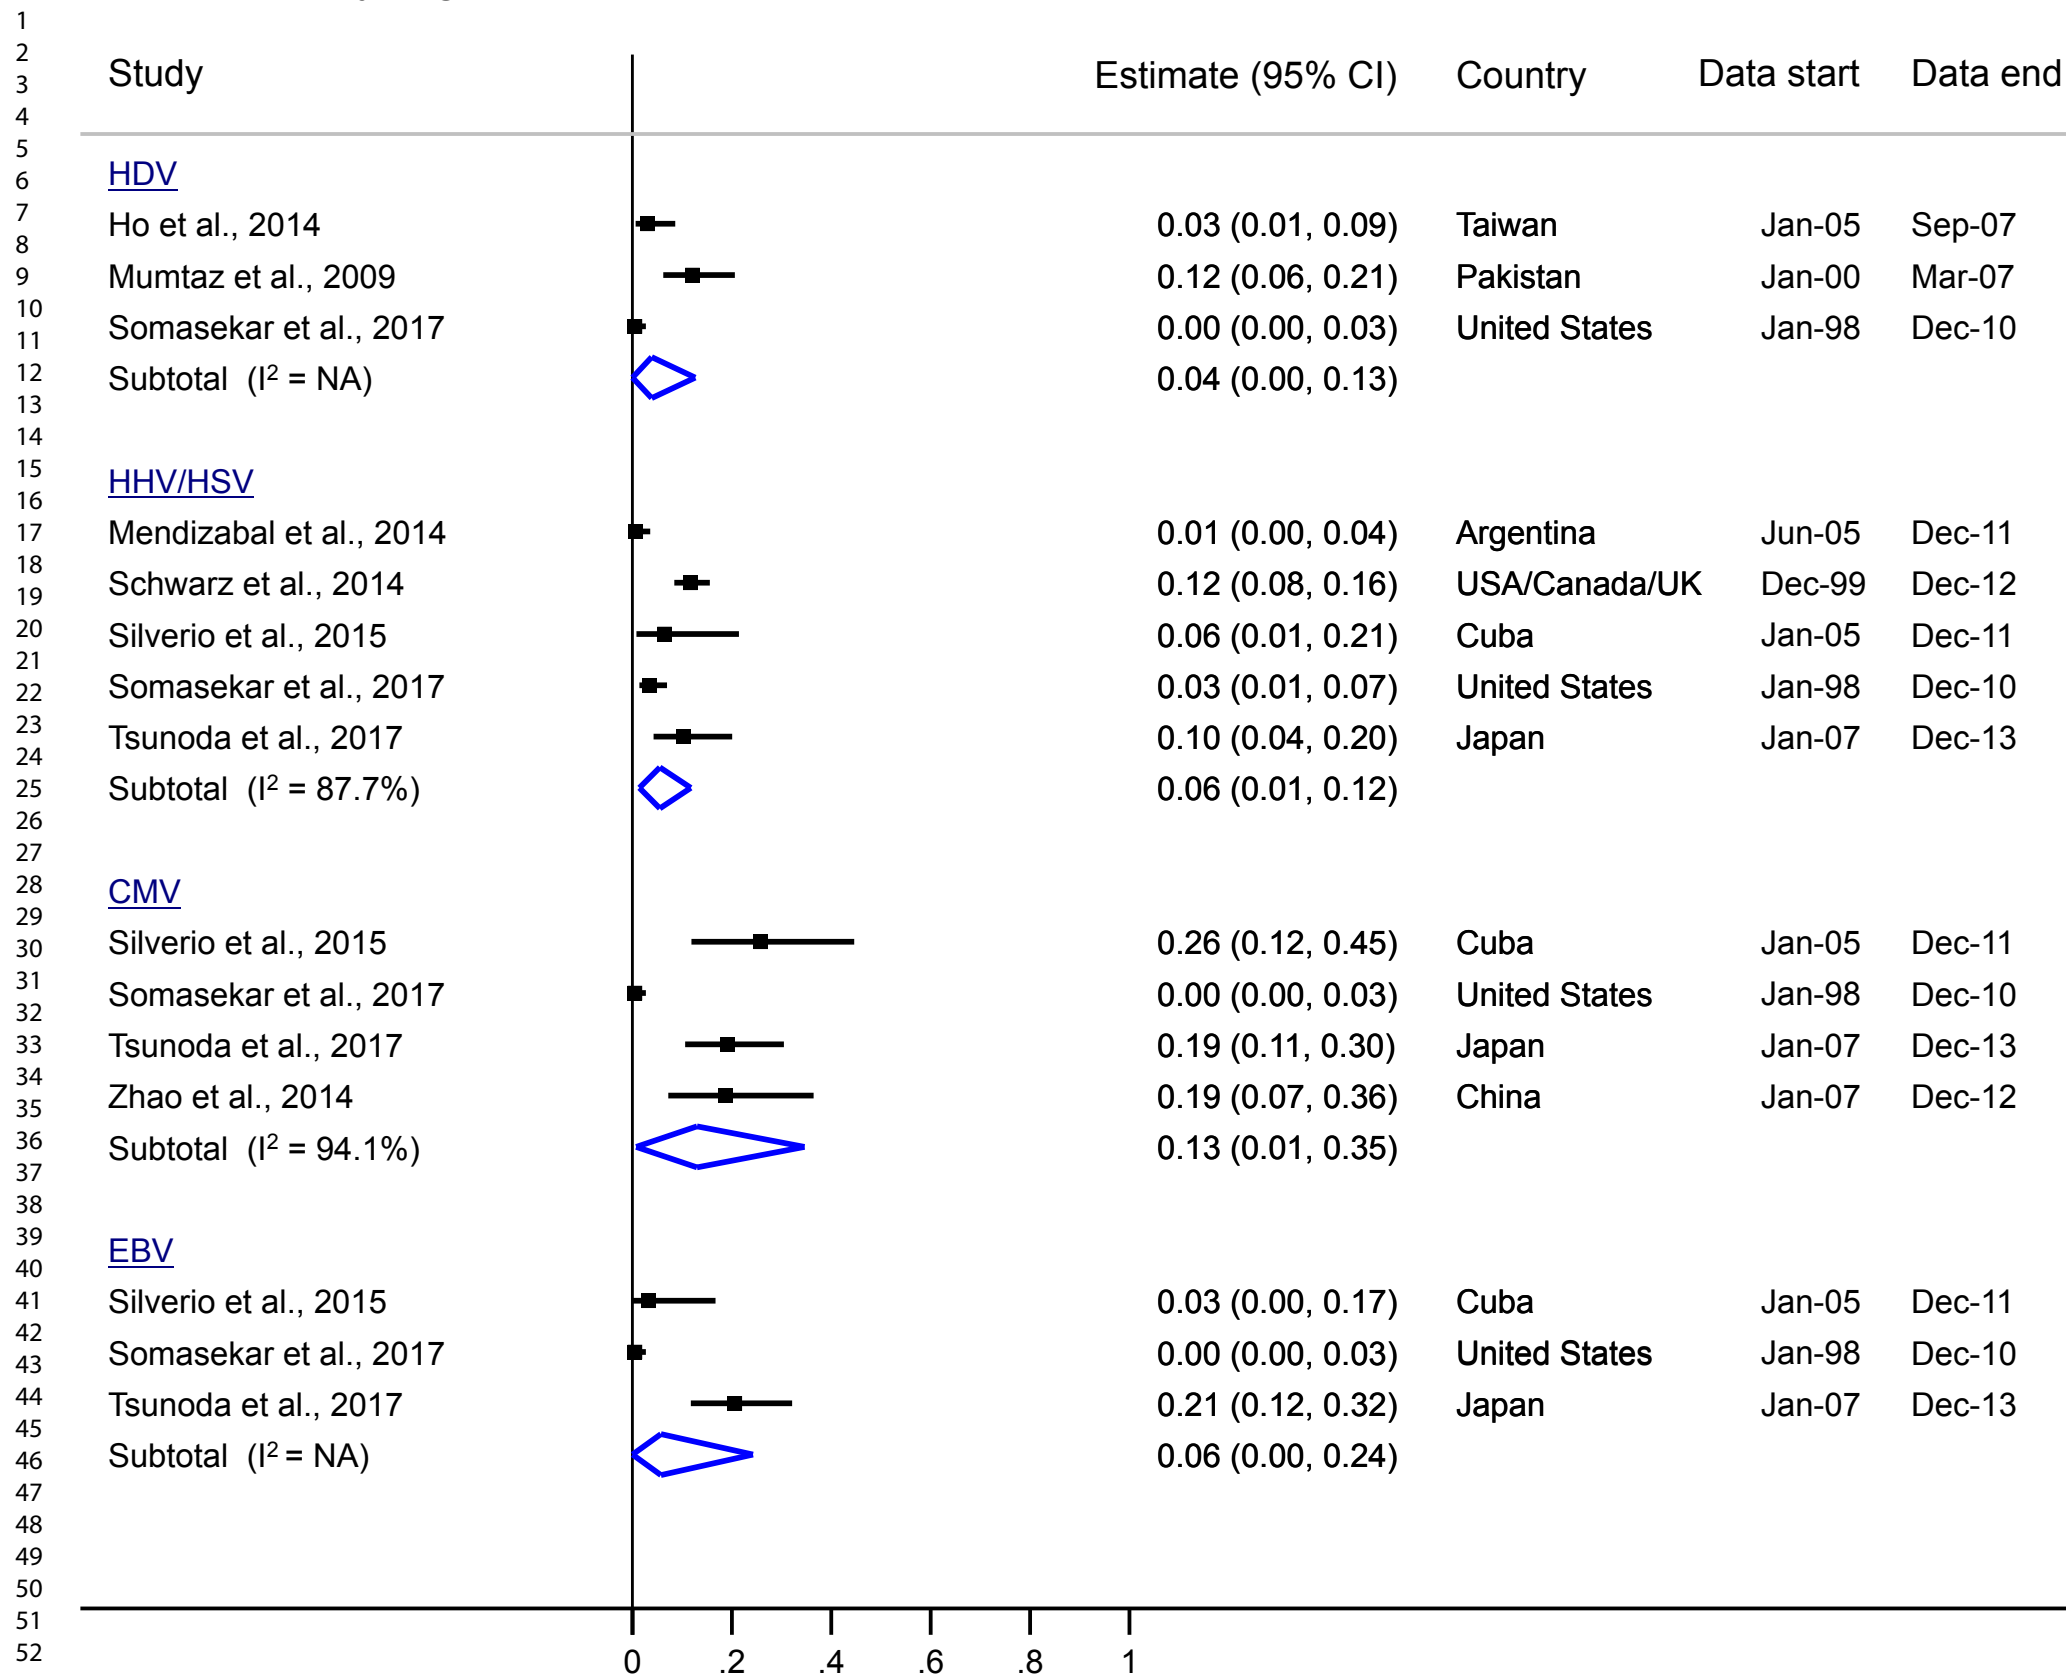

For peer review only - <http://bmjopen.bmj.com/site/about/guidelines.xhtml>

Abbreviations: HDV = hepatitis D virus, HHV/HSV = Human Herpes virus/Herpes Simplex Virus, CMV = Cytomegalovirus, EBV = Epstein-Barr virus,

## SUPPLEMENTARY TABLE

| Supplementary Table 1: Risk of bias judgements for included studies |                                                            |                                                   |                                              |                                                                  |                                                               |                                          |                          |                                              |                           |                                                               |       |
|---------------------------------------------------------------------|------------------------------------------------------------|---------------------------------------------------|----------------------------------------------|------------------------------------------------------------------|---------------------------------------------------------------|------------------------------------------|--------------------------|----------------------------------------------|---------------------------|---------------------------------------------------------------|-------|
| Study ID                                                            | Represent<br>ation of<br>the<br>national<br>populatio<br>n | Represent<br>ation of<br>target<br>populatio<br>n | Rand<br>om<br>select<br>ion or<br>censu<br>s | Minim<br>al<br>likelih<br>ood of<br>non-<br>respon<br>se<br>bias | Data<br>collecte<br>d<br>directly<br>from<br>particip<br>ants | Accept<br>able<br>case<br>definiti<br>on | Valid<br>measure<br>ment | Same<br>mode<br>of<br>data<br>collect<br>ion | Appropri<br>ate<br>length | Appropri<br>ate<br>numerator<br>(s) and<br>denomina<br>tor(s) | Score |
| Alam et al., 2009                                                   | No                                                         | Yes                                               | No                                           | Yes                                                              | Yes                                                           | Yes                                      | Yes                      | Yes                                          | Yes                       | Yes                                                           | 8     |
| Asim et al., 2009                                                   | Yes                                                        | Yes                                               | No                                           | Yes                                                              | Yes                                                           | Yes                                      | Yes                      | Yes                                          | Yes                       | Yes                                                           | 9     |
| Bechmann et al., 2014                                               | Yes                                                        | Yes                                               | Yes                                          | Yes                                                              | Yes                                                           | Yes                                      | Yes                      | Yes                                          | Yes                       | Yes                                                           | 10    |
| Bhati et al., 2013                                                  | Yes                                                        | No                                                | No                                           | Yes                                                              | Yes                                                           | Yes                                      | Yes                      | Yes                                          | Yes                       | Yes                                                           | 8     |
| Borkakoti et al., 2013                                              | No                                                         | Yes                                               | No                                           | Yes                                                              | Yes                                                           | Yes                                      | Yes                      | Yes                                          | Yes                       | Yes                                                           | 8     |
| Bravo et al., 2012                                                  | No                                                         | No                                                | Yes                                          | Yes                                                              | Yes                                                           | Yes                                      | Yes                      | Yes                                          | Yes                       | Yes                                                           | 8     |
| Cervio et al., 2011                                                 | No                                                         | Yes                                               | Yes                                          | Yes                                                              | Yes                                                           | Yes                                      | Yes                      | Yes                                          | Yes                       | Yes                                                           | 9     |
| Das et al., 2016                                                    | Yes                                                        | Yes                                               | No                                           | Yes                                                              | Yes                                                           | Yes                                      | Yes                      | Yes                                          | Yes                       | Yes                                                           | 9     |
| Gupta et al., 2015                                                  | Yes                                                        | Yes                                               | Yes                                          | Yes                                                              | Yes                                                           | Yes                                      | Yes                      | Yes                                          | Yes                       | Yes                                                           | 10    |
| Ho et al., 2014                                                     | Yes                                                        | Yes                                               | Yes                                          | Yes                                                              | Yes                                                           | Yes                                      | Yes                      | Yes                                          | Yes                       | Yes                                                           | 10    |
| Latif et al., 2010                                                  | No                                                         | Yes                                               | No                                           | Yes                                                              | Yes                                                           | Yes                                      | Yes                      | Yes                                          | Yes                       | Yes                                                           | 9     |
| Mamun et al., 2009                                                  | No                                                         | Yes                                               | No                                           | No                                                               | Yes                                                           | Yes                                      | Yes                      | Yes                                          | Yes                       | Yes                                                           | 9     |
| Manka et al., 2015                                                  | No                                                         | Yes                                               | Yes                                          | No                                                               | Yes                                                           | Yes                                      | No                       | Yes                                          | Yes                       | Yes                                                           | 8     |
| Mendizabal et al., 2014                                             | No                                                         | Yes                                               | Yes                                          | No                                                               | Yes                                                           | Yes                                      | Yes                      | Yes                                          | Yes                       | Yes                                                           | 8     |
| Mishra et al., 2016                                                 | No                                                         | Yes                                               | No                                           | No                                                               | Yes                                                           | Yes                                      | Yes                      | Yes                                          | Yes                       | Yes                                                           | 7     |
| Mumtaz et al., 2009                                                 | Yes                                                        | Yes                                               | Yes                                          | Yes                                                              | Yes                                                           | Yes                                      | Yes                      | Yes                                          | Yes                       | Yes                                                           | 10    |
| Pandit et al., 2015                                                 | No                                                         | Yes                                               | No                                           | No                                                               | Yes                                                           | Yes                                      | Yes                      | Yes                                          | Yes                       | Yes                                                           | 8     |
| Poovorawan et al., 2013                                             | Yes                                                        | Yes                                               | Yes                                          | Yes                                                              | Yes                                                           | Yes                                      | Yes                      | Yes                                          | Yes                       | No                                                            | 9     |
| Schwarz et al., 2014                                                | Yes                                                        | Yes                                               | Yes                                          | Yes                                                              | Yes                                                           | Yes                                      | Yes                      | Yes                                          | Yes                       | No                                                            | 9     |
| Shalimar et al., 2017                                               | Yes                                                        | Yes                                               | Yes                                          | Yes                                                              | Yes                                                           | Yes                                      | Yes                      | Yes                                          | Yes                       | Yes                                                           | 10    |
| Silverio et al., 2015                                               | Yes                                                        | Yes                                               | Yes                                          | Yes                                                              | Yes                                                           | Yes                                      | Yes                      | Yes                                          | Yes                       | Yes                                                           | 10    |
| Somasekar et al., 2017                                              | Yes                                                        | Yes                                               | No                                           | No                                                               | Yes                                                           | Yes                                      | Yes                      | Yes                                          | Yes                       | Yes                                                           | 8     |

|                                |     |     |     |     |     |     |     |     |     |     |     |    |
|--------------------------------|-----|-----|-----|-----|-----|-----|-----|-----|-----|-----|-----|----|
| Uddin<br>Jamro et<br>al., 2013 | Yes | 10 |
| Tsunoda et<br>al., 2017        | Yes | Yes | Yes | No  | Yes | 9  |
| Zhao et al.,<br>2014           | Yes | Yes | No  | No  | Yes | 8  |

For peer review only

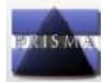

# PRISMA 2009 Checklist

| Section/topic                      | #  | Checklist item                                                                                                                                                                                                                                                                                              | Reported on page # |
|------------------------------------|----|-------------------------------------------------------------------------------------------------------------------------------------------------------------------------------------------------------------------------------------------------------------------------------------------------------------|--------------------|
| <b>TITLE</b>                       |    |                                                                                                                                                                                                                                                                                                             |                    |
| Title                              | 1  | Identify the report as a systematic review, meta-analysis, or both.                                                                                                                                                                                                                                         | Title Page         |
| <b>ABSTRACT</b>                    |    |                                                                                                                                                                                                                                                                                                             |                    |
| Structured summary                 | 2  | Provide a structured summary including, as applicable: background; objectives; data sources; study eligibility criteria, participants, and interventions; study appraisal and synthesis methods; results; limitations; conclusions and implications of key findings; systematic review registration number. | 1                  |
| <b>INTRODUCTION</b>                |    |                                                                                                                                                                                                                                                                                                             |                    |
| Rationale                          | 3  | Describe the rationale for the review in the context of what is already known.                                                                                                                                                                                                                              | 2                  |
| Objectives                         | 4  | Provide an explicit statement of questions being addressed with reference to participants, interventions, comparisons, outcomes, and study design (PICOS).                                                                                                                                                  | 2-3                |
| <b>METHODS</b>                     |    |                                                                                                                                                                                                                                                                                                             |                    |
| Protocol and registration          | 5  | Indicate if a review protocol exists, if and where it can be accessed (e.g., Web address), and, if available, provide registration information including registration number.                                                                                                                               | 3                  |
| Eligibility criteria               | 6  | Specify study characteristics (e.g., PICOS, length of follow-up) and report characteristics (e.g., years considered, language, publication status) used as criteria for eligibility, giving rationale.                                                                                                      | 3                  |
| Information sources                | 7  | Describe all information sources (e.g., databases with dates of coverage, contact with study authors to identify additional studies) in the search and date last searched.                                                                                                                                  | 3                  |
| Search                             | 8  | Present full electronic search strategy for at least one database, including any limits used, such that it could be repeated.                                                                                                                                                                               | 3                  |
| Study selection                    | 9  | State the process for selecting studies (i.e., screening, eligibility, included in systematic review, and, if applicable, included in the meta-analysis).                                                                                                                                                   | 3-4                |
| Data collection process            | 10 | Describe method of data extraction from reports (e.g., piloted forms, independently, in duplicate) and any processes for obtaining and confirming data from investigators.                                                                                                                                  | 4                  |
| Data items                         | 11 | List and define all variables for which data were sought (e.g., PICOS, funding sources) and any assumptions and simplifications made.                                                                                                                                                                       | 4                  |
| Risk of bias in individual studies | 12 | Describe methods used for assessing risk of bias of individual studies (including specification of whether this was done at the study or outcome level), and how this information is to be used in any data synthesis.                                                                                      | 4-5                |
| Summary measures                   | 13 | State the principal summary measures (e.g., risk ratio, difference in means).                                                                                                                                                                                                                               | 4                  |

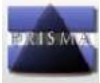

# PRISMA 2009 Checklist

1  
2  
3  
4  
5  
6  
7  
8  
9  
10  
11  
12  
13  
14  
15  
16  
17  
18  
19  
20  
21  
22  
23  
24  
25  
26  
27  
28  
29  
30  
31  
32  
33  
34  
35  
36  
37  
38  
39  
40  
41  
42  
43  
44  
45  
46  
47

|                      |    |                                                                                                                                                           |   |
|----------------------|----|-----------------------------------------------------------------------------------------------------------------------------------------------------------|---|
| Synthesis of results | 14 | Describe the methods of handling data and combining results of studies, if done, including measures of consistency (e.g., $I^2$ ) for each meta-analysis. | 4 |
|----------------------|----|-----------------------------------------------------------------------------------------------------------------------------------------------------------|---|

Page 1 of 2

| Section/topic                 | #  | Checklist item                                                                                                                                                                                           | Reported on page # |
|-------------------------------|----|----------------------------------------------------------------------------------------------------------------------------------------------------------------------------------------------------------|--------------------|
| Risk of bias across studies   | 15 | Specify any assessment of risk of bias that may affect the cumulative evidence (e.g., publication bias, selective reporting within studies).                                                             | 4-5                |
| Additional analyses           | 16 | Describe methods of additional analyses (e.g., sensitivity or subgroup analyses, meta-regression), if done, indicating which were pre-specified.                                                         | 4                  |
| <b>RESULTS</b>                |    |                                                                                                                                                                                                          |                    |
| Study selection               | 17 | Give numbers of studies screened, assessed for eligibility, and included in the review, with reasons for exclusions at each stage, ideally with a flow diagram.                                          | 5                  |
| Study characteristics         | 18 | For each study, present characteristics for which data were extracted (e.g., study size, PICOS, follow-up period) and provide the citations.                                                             | 5                  |
| Risk of bias within studies   | 19 | Present data on risk of bias of each study and, if available, any outcome level assessment (see item 12).                                                                                                | 6                  |
| Results of individual studies | 20 | For all outcomes considered (benefits or harms), present, for each study: (a) simple summary data for each intervention group (b) effect estimates and confidence intervals, ideally with a forest plot. | 5-6                |
| Synthesis of results          | 21 | Present results of each meta-analysis done, including confidence intervals and measures of consistency.                                                                                                  | 5-6                |
| Risk of bias across studies   | 22 | Present results of any assessment of risk of bias across studies (see Item 15).                                                                                                                          | 6                  |
| Additional analysis           | 23 | Give results of additional analyses, if done (e.g., sensitivity or subgroup analyses, meta-regression [see Item 16]).                                                                                    | 5-6                |
| <b>DISCUSSION</b>             |    |                                                                                                                                                                                                          |                    |
| Summary of evidence           | 24 | Summarize the main findings including the strength of evidence for each main outcome; consider their relevance to key groups (e.g., healthcare providers, users, and policy makers).                     | 6-8                |
| Limitations                   | 25 | Discuss limitations at study and outcome level (e.g., risk of bias), and at review-level (e.g., incomplete retrieval of identified research, reporting bias).                                            | 8                  |
| Conclusions                   | 26 | Provide a general interpretation of the results in the context of other evidence, and implications for future research.                                                                                  | 9                  |
| <b>FUNDING</b>                |    |                                                                                                                                                                                                          |                    |
| Funding                       | 27 | Describe sources of funding for the systematic review and other support (e.g., supply of data); role of funders for the systematic review.                                                               | 10                 |



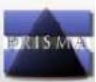

# PRISMA 2009 Checklist

- 1
- 2
- 3
- 4
- 5
- 6
- 7
- 8
- 9
- 10
- 11
- 12
- 13
- 14
- 15
- 16
- 17
- 18
- 19
- 20
- 21
- 22
- 23
- 24
- 25
- 26
- 27
- 28
- 29
- 30
- 31
- 32
- 33
- 34
- 35
- 36
- 37
- 38
- 39
- 40
- 41
- 42
- 43
- 44
- 45
- 46
- 47

For more information, visit: [www.prisma-statement.org](http://www.prisma-statement.org).

Page 2 of 2

For peer review only

# BMJ Open

## A Systematic Review of the Global Epidemiology of Viral-Induced Acute Liver Failure

|                                 |                                                                                                                                                                                                                                                                                                                                                                                                                                                                                                                                                                                                                                                                                                                                                                                                                                                                                                                                                                                                                                                                                                                                                                                                                                                                                                                                                                                                                                                                                                                                            |
|---------------------------------|--------------------------------------------------------------------------------------------------------------------------------------------------------------------------------------------------------------------------------------------------------------------------------------------------------------------------------------------------------------------------------------------------------------------------------------------------------------------------------------------------------------------------------------------------------------------------------------------------------------------------------------------------------------------------------------------------------------------------------------------------------------------------------------------------------------------------------------------------------------------------------------------------------------------------------------------------------------------------------------------------------------------------------------------------------------------------------------------------------------------------------------------------------------------------------------------------------------------------------------------------------------------------------------------------------------------------------------------------------------------------------------------------------------------------------------------------------------------------------------------------------------------------------------------|
| Journal:                        | <i>BMJ Open</i>                                                                                                                                                                                                                                                                                                                                                                                                                                                                                                                                                                                                                                                                                                                                                                                                                                                                                                                                                                                                                                                                                                                                                                                                                                                                                                                                                                                                                                                                                                                            |
| Manuscript ID                   | bmjopen-2020-037473.R2                                                                                                                                                                                                                                                                                                                                                                                                                                                                                                                                                                                                                                                                                                                                                                                                                                                                                                                                                                                                                                                                                                                                                                                                                                                                                                                                                                                                                                                                                                                     |
| Article Type:                   | Original research                                                                                                                                                                                                                                                                                                                                                                                                                                                                                                                                                                                                                                                                                                                                                                                                                                                                                                                                                                                                                                                                                                                                                                                                                                                                                                                                                                                                                                                                                                                          |
| Date Submitted by the Author:   | 04-Jun-2020                                                                                                                                                                                                                                                                                                                                                                                                                                                                                                                                                                                                                                                                                                                                                                                                                                                                                                                                                                                                                                                                                                                                                                                                                                                                                                                                                                                                                                                                                                                                |
| Complete List of Authors:       | Patterson, Jenna; University of Cape Town Faculty of Health Sciences, Vaccines for Africa Initiative, School of Public Health and Family Medicine<br>Hussey, Hannah; University of Cape Town Faculty of Health Sciences, Vaccines for Africa Initiative, School of Public Health & Family Medicine<br>Silal, Sheetal; University of Cape Town, Department of Statistical Sciences; University of Oxford, Nuffield Department of Medicine<br>Goddard, Liz; University of Cape Town, Department of Paediatrics, Red Cross War Memorial Children's Hospital<br>Setshedi, Mashiko; University of Cape Town, Department of Medicine, Division of Gastroenterology, Groote Schuur Hospital<br>Spearman, Wendy ; University of Cape Town, Department of Medicine, Division of Hepatology, Groote Schuur Hospital<br>Hussey, Gregory; University of Cape Town Faculty of Health Sciences, Institute of Infectious Disease and Molecular Medicine, University of Cape Town, South Africa; University of Cape Town Faculty of Health Sciences, Vaccines for Africa Initiative, School of Public Health and Family Medicine<br>Kagina, Benjamin; University of Cape Town Faculty of Health Sciences, Vaccines for Africa Initiative, School of Public Health and Family Medicine<br>Muloiswa, Rudzani; University of Cape Town, 5Department of Pediatrics & Child Health, Red Cross War Memorial Children's Hospital; University of Cape Town Faculty of Health Sciences, Vaccines for Africa Initiative, School of Public Health and Family Medicine |
| <b>Primary Subject Heading</b>: | Epidemiology                                                                                                                                                                                                                                                                                                                                                                                                                                                                                                                                                                                                                                                                                                                                                                                                                                                                                                                                                                                                                                                                                                                                                                                                                                                                                                                                                                                                                                                                                                                               |
| Secondary Subject Heading:      | Infectious diseases                                                                                                                                                                                                                                                                                                                                                                                                                                                                                                                                                                                                                                                                                                                                                                                                                                                                                                                                                                                                                                                                                                                                                                                                                                                                                                                                                                                                                                                                                                                        |
| Keywords:                       | Epidemiology < INFECTIOUS DISEASES, Hepatology < INTERNAL MEDICINE, VIROLOGY                                                                                                                                                                                                                                                                                                                                                                                                                                                                                                                                                                                                                                                                                                                                                                                                                                                                                                                                                                                                                                                                                                                                                                                                                                                                                                                                                                                                                                                               |
|                                 |                                                                                                                                                                                                                                                                                                                                                                                                                                                                                                                                                                                                                                                                                                                                                                                                                                                                                                                                                                                                                                                                                                                                                                                                                                                                                                                                                                                                                                                                                                                                            |

SCHOLARONE™  
Manuscripts



I, the Submitting Author has the right to grant and does grant on behalf of all authors of the Work (as defined in the below author licence), an exclusive licence and/or a non-exclusive licence for contributions from authors who are: i) UK Crown employees; ii) where BMJ has agreed a CC-BY licence shall apply, and/or iii) in accordance with the terms applicable for US Federal Government officers or employees acting as part of their official duties; on a worldwide, perpetual, irrevocable, royalty-free basis to BMJ Publishing Group Ltd ("BMJ") its licensees and where the relevant Journal is co-owned by BMJ to the co-owners of the Journal, to publish the Work in this journal and any other BMJ products and to exploit all rights, as set out in our [licence](#).

The Submitting Author accepts and understands that any supply made under these terms is made by BMJ to the Submitting Author unless you are acting as an employee on behalf of your employer or a postgraduate student of an affiliated institution which is paying any applicable article publishing charge ("APC") for Open Access articles. Where the Submitting Author wishes to make the Work available on an Open Access basis (and intends to pay the relevant APC), the terms of reuse of such Open Access shall be governed by a Creative Commons licence – details of these licences and which [Creative Commons](#) licence will apply to this Work are set out in our licence referred to above.

Other than as permitted in any relevant BMJ Author's Self Archiving Policies, I confirm this Work has not been accepted for publication elsewhere, is not being considered for publication elsewhere and does not duplicate material already published. I confirm all authors consent to publication of this Work and authorise the granting of this licence.

## A Systematic Review of the Global Epidemiology of Viral-Induced Acute Liver Failure

Jenna Patterson<sup>1,2</sup>, Hannah Sophia Hussey<sup>1,2</sup>, Sheetal Silal<sup>3,4</sup>, Liz Goddard<sup>5</sup>, Mashiko Setshedi<sup>6</sup>, C. Wendy Spearman<sup>7</sup>, Gregory D. Hussey<sup>1,8</sup> Benjamin M. Kagina<sup>1,2</sup> and Rudzani Muloiwa<sup>1,5</sup>

<sup>1</sup>Vaccines for Africa Initiative, University of Cape Town, South Africa

<sup>2</sup>School of Public Health & Family Medicine, University of Cape Town, South Africa

<sup>3</sup>Modelling and Simulation Hub, Africa, Department of Statistical Sciences, Faculty of Science, University of Cape Town, South Africa

<sup>4</sup>Nuffield Department of Medicine, Oxford University, Oxford, United Kingdom

<sup>5</sup>Department of Pediatrics & Child Health, Red Cross War Memorial Children's Hospital, University of Cape Town

<sup>6</sup>Department of Medicine, Division of Gastroenterology, Groote Schuur Hospital, University of Cape Town, South Africa

<sup>7</sup>Division of Hepatology, Department of Medicine, Faculty of Health Sciences, University of Cape Town and Groote Schuur Hospital, South Africa

<sup>8</sup>Institute of Infectious Disease and Molecular Medicine, University of Cape Town, South Africa

<sup>5</sup>Department of Pediatrics & Child Health, Red Cross War Memorial Children's Hospital, University of Cape Town

*Corresponding author:* Jenna Patterson

*Corresponding author's ORCID iD:* 0000-0002-3927-037X

*Corresponding author's email address:* pttjen005@myuct.ac.za

*Corresponding author's postal address:* Vaccines for Africa Initiative, Room N2.09A, Werner Beit North, Health Sciences Campus, Anzio Road, Observatory, 7925

*H.S. Hussey email address:* hshussey@gmail.com

*S. Silal email address:* sheetal.silal@uct.ac.za

*E. Goddard email address:* liz.goddard@uct.ac.za

*M. Setshedi email address:* mashiko.setshedi@uct.ac.za

*W. Spearman email address:* wendy.spearman@uct.ac.za

*G.D. Hussey email address:* gregory.hussey@uct.ac.za

*B.M. Kagina email address:* benjamin.kagina@uct.ac.za

*R. Muloiwa email address:* rudzani.muloiwa@uct.ac.za

## **REQUIRED STATEMENTS**

### **Conflict of interest disclosure**

All authors have no conflicts of interest to declare.

### **Ethics approval statement**

This study did not require ethics approval as it uses publicly available, published data.

### **Patient consent statement**

This study did not require consent from patients as it uses no individual data.

### **Permission to reproduce material from other sources**

This study has cited all references which are published and publicly available.

## **ABBREVIATIONS**

- Acute liver failure (ALF)
- Hepatitis A virus (HAV)
- Hepatitis B virus (HBV)
- Hepatitis C virus (HCV)
- Hepatitis D virus (HDV)
- Hepatitis E virus (HEV)
- Epstein Barr virus (EBV)
- Herpes simplex virus-1 (HSV1)
- Herpes simplex virus-2 (HSV2)
- Varicella-zoster virus (VZV)
- Human parainfluenza viruses (HPIVs)
- Yellow fever virus (YFV)
- Human herpesvirus 6 (HHV-6)
- Cytomegalovirus (CMV)
- Coxsackievirus (CA16)
- Adenovirus (HAdVs)
- Medical Subject Headings (MESH)
- Low- and middle- income countries (LMICs)

## **ABSTRACT**

**Objectives:** The etiology and burden of viral-induced acute liver failure (ALF) remains unclear, globally. It is important to understand the epidemiology of viral-induced ALF to plan for clinical case management and case prevention.

**Participants:** This systematic review was conducted to synthesize data on the relative contribution of different viruses to the etiology of viral-induced ALF in attempt to compile evidence that is currently missing in the field. EBSCOhost, PubMed, ScienceDirect, Scopus and Web of Science were searched for relevant literature published from 2009 to 2019. The initial search was run on 9 April 2019 and updated via PubMed on 30 September 2019 with no new eligible studies to include. Twenty-five eligible studies were included in the results of this review.

**Results:** This systematic review estimated the burden of acute liver failure following infection with HBV, HAV, HBV, HCV, HEV, HSV/HHV, CMV, EBV, and parvo-virus B19. Data were largely missing for ALF following infection with VZV, HPIVs, YFV, CA16 and/or HAdVs. The prevalence of HAV-induced ALF was markedly lower in countries with routine HAV immunization vs no routine HAV immunization. Hepatitis E virus was the most common etiological cause of viral-induced ALF reported in this review. In addition, viral-induced ALF had poor outcomes as indicated by high fatality rates, which appear to increase with poor economic status of the studied countries.

**Conclusions:** Immunization against HAV and HBV should be prioritized in LMICs to prevent high viral-induced ALF mortality rates, especially in settings where resources for managing acute liver failure are lacking. The expanded use of HEV immunization should be explored as HEV was the most common cause of ALF.

**Registration:** PROSPERO registration number CRD42017079730

### **Strengths and limitations**

- Comprehensive and exhaustive search for relevant studies from several databases.
- Comprehensive diagnostic inclusion criteria for acute liver failure cases according to international guideline.
- Lack of language restrictions in search lead to inclusion of geographically diverse data.
- Findings are limited by lack of data for some of the viral etiologies of ALF which may have led to an underestimation of the global burden of viral-induced ALF.
- Diversity of viruses attributable to ALF cases and viral detection methods led to high heterogeneity and low statistical power in meta-analyses conducted.

23

1

1  
2  
3 24 **MANUSCRIPT**  
4 25  
5 26

6 **Background**

7 27 Acute liver failure (ALF) refers to the development of encephalopathy and synthetic function impairment  
8  
9 28 following acute liver injury in an individual without pre-existing liver disease (1). The presence of  
10  
11 29 encephalopathy is not required to define ALF in paediatrics, but is an essential component of the  
12  
13 30 definition in adults (1). Possible causes of ALF include viral infections, drugs and toxins, pregnancy  
14  
15 31 related liver diseases, vascular causes and/or malignancies. Acute viral hepatitis has been identified as  
16  
17 32 the most common cause of ALF among all ages in Asia and Africa and one of the most common causes of  
18  
19 33 ALF in children in Asia and South America (2, 3). The incidence of viral-induced ALF has substantially  
20  
21 34 declined in Europe following the introduction of universal immunization against the hepatitis B virus  
22  
23 35 (HBV), with only 19% of all ALF cases now attributable to viral infection in the European population (4).  
24  
25 36 The introduction of routine immunization against the hepatitis A virus (HAV) in Argentina has reduced  
26  
27 37 the number of hepatitis A induced ALF cases by more than 25% (4).

28  
29 38 Fatality rates associated with ALF vary between 60% and 80%, depending on the disease etiology as well  
30  
31 39 as a patient's access to care (5, 6). Liver transplantation plays a central role in the management of ALF  
32  
33 40 and remains the only definitive treatment for patients who fail to demonstrate spontaneous recovery  
34  
35 41 (7). A large proportion of patients with ALF in both high and low resource settings, however, are deemed  
36  
37 42 to have contraindications to transplantation or deteriorate beyond transplantation before a liver donor  
38  
39 43 is found (8-10).

40  
41 44 The burden of viral-induced ALF around the world still remains unclear, with little to no data collected  
42  
43 45 regarding the disease incidence (3). Establishing the etiology of viral-induced ALF is important for early  
44  
45 46 initiation of treatment, determining the prognosis of the liver failure and identifying potential  
46  
47 47 contraindications to liver transplantation. Most importantly, understanding the epidemiology of vaccine-  
48  
49 48 preventable etiologies of ALF should be prioritised in under-resourced regions with limited access to  
50  
51 49 facilities for transplantation. This review aims to synthesize data on the relative contribution of different  
52  
53 50 viruses to the etiology of viral-induced ALF in attempt to compile evidence that is currently missing in  
54  
55 51 the field.

56  
57 52 *Bernal et al. 2010* completed a review of the burden of acute and fulminant liver failure based on  
58  
59 53 literature published between 1997 and 2009. The review became the bases for guidelines for clinical

1  
2  
3 54 practice (5). In this systematic review, we assess whether data have changed following the Bernal  
4  
5 55 publication, and whether there is evidence to warrant a review of clinical practice.  
6  
7

## 8 56 **Objectives**

- 9 57 • To estimate the prevalence of hepatitis A virus (HAV), hepatitis B virus (HBV), hepatitis C virus  
10 58 (HCV), hepatitis D virus (HDV), hepatitis E virus (HEV), Epstein Barr virus (EBV), herpes simplex  
11 59 virus-1 (HSV1), herpes simplex virus-2 (HSV2), varicella-zoster virus (VZV), parvo-virus B19,  
12 60 human parainfluenza viruses (HPIVs), yellow fever virus (YFV), human herpesvirus 6 (HHV-6),  
13 61 cytomegalovirus (CMV), coxsackievirus (CA16) and/or adenovirus (HAdVs) among patients with  
14 62 ALF.
- 15 63 • To estimate the mortality rate for cases of ALF following infection with HAV, HBV, HCV, HDV,  
16 64 HEV, EBV, HSV1, HSV2, VZV, parvo-virus B19, HPIVs, YFV, HHV-6, CMV, CA16 and/or HAdVs
- 17 65 • To estimate the prevalence and incidence of liver transplantation for cases of ALF following  
18 66 infection with HAV, HBV, HCV, HDV, HEV, EBV, HSV1, HSV2, VZV, parvo-virus B19, HPIVs, YFV,  
19 67 HHV-6, CMV, CA16 and/or HAdVs  
20 68

## 21 69 **Methods**

22 70 This systematic review was registered with PROSPERO (registration number CRD42017079730) and the  
23 71 methods for its conduction have been published (11). The results of the review are reported using the  
24 72 Preferred Reporting Items for Systematic Reviews and Meta-analyses (PRISMA) guidelines checklist.  
25 73

### 26 74 **Study eligibility criteria**

27 75 Published cross-sectional, surveillance and cohort studies reporting the outcomes of interest in patients  
28 76 with ALF following infection with HAV, HBV, HCV, HDV, HEV, EBV, HSV1, HSV2, VZV, parvo-virus B19,  
29 77 HPIVs, YFV, HHV-6, CMV, CA16 and/or HAdVs were eligible for inclusion in this study. Studies were  
30 78 eligible for inclusion if they had clearly stated case definitions of viral-induced ALF and confirmed ALF  
31 79 cases using both clinical and serological, molecular or culture diagnostic methods.  
32 80

### 33 81 **Search strategy**

34 82 A combination of the following search terms (including the use of Medical Subject Headings (MESH))  
35 83 was used and adapted for each of the relevant electronic databases: epidemiology, prevalence,  
36 84 incidence, burden, mortality, morbidity, fulminant hepatic failure, fulminant liver failure, acute hepatic  
37



1  
2  
3 85 failure, acute liver failure, Hepatitis A virus (HAV), hepatitis B virus (HBV), hepatitis C virus (HCV),  
4  
5 86 hepatitis D virus (HDV), hepatitis E virus (HEV), Epstein Barr virus (EBV), herpes simplex virus-1 (HSV1),  
6  
7 87 herpes simplex virus-2 (HSV2), varicella-zoster virus (VZV), parvo-virus B19, human parainfluenza viruses  
8  
9 88 (HPIVs), yellow fever virus (YFV), human herpesvirus 6 (HHV-6), cytomegalovirus (CMV), coxsackie virus  
10  
11 89 and adenovirus.  
12

13 90  
14 91 The following electronic databases were searched for relevant literature published from 2009 to 2019:  
15 92 EBSCOhost, PubMed, ScienceDirect, Scopus and Web of Science. The search was run on 9 April 2019 and  
16 93 updated via PubMed on 30 September 2019 with no new eligible studies to include.  
17  
18 94

#### 19 95 **Data extraction**

21 96 Study characteristics and outcomes of interests were extracted from the included studies on a pre-  
22 97 designed data extraction form by two independent reviewers (JP and HH). Prior to use by the two  
23 98 reviewers, the reliability of the extraction form was assessed by piloting 10 randomly selected articles  
24 99 that met the inclusion criteria. The study team resolved any disagreements in data extraction through  
25 100 consensus in consultation with RM. In cases where studies were in German, HH provided translation. In  
26 101 cases where studies were not available in English or German, google translate was used to translate the  
27 102 article to English (12).  
28  
29

#### 30 103 31 104 **Data synthesis and analysis**

32 105 A random-effects model was fitted to the study data as it included data taken from a series of  
33 106 independently performed studies in different populations. We assessed heterogeneity by calculating  $I^2$   
34 107 statistics (threshold  $I^2 > 40\%$ ). The values of  $I^2$  were categorized for heterogeneity as follows: “not  
35 108 important” ( $\leq 40\%$ ), “moderate” ( $> 40\%$  to  $\leq 60\%$ ) and “considerable” ( $> 60\%$  to  $\leq 80\%$ ) and  
36 109 “substantial” ( $> 80\%$  to  $\leq 100\%$ ). Where “not important” or “moderate” heterogeneity existed  
37 110 between studies ( $I^2 \leq 60\%$ ), pooled outcome measures were reported with 95% confidence intervals for  
38 111 each respective outcome. Where “considerable” or “substantial” heterogeneity exists between studies  
39 112 ( $I^2 > 60\%$ ), forest plots and prevalence ranges calculated using the random-effects model were used to  
40 113 narratively describe each outcome.  
41  
42  
43  
44  
45  
46  
47  
48  
49  
50  
51  
52

#### 53 114 54 115 **Risk of bias assessment**

1  
2  
3 116 Each included study was assessed for risk of bias and quality using the Hoy *et al.*, 2012 tool for  
4  
5 117 observational studies (13, 14). Studies were judged as having 'low risk' if scored 8-10, 'moderate risk' if  
6  
7 118 scored 5-7 and 'high risk' if scored 0-5. All risk of bias judgements were made by both JP and HH. In case  
8  
9 119 of disagreement in risk of bias and quality assessment, a final decision was made through consensus in  
10  
11 120 consultation with RM.  
12

11  
12

### 13 122 **Patient and public involvement**

14  
15 123 This review was developed as part of an ongoing project by the research team that aims to generate  
16  
17 124 evidence to facilitate evidence-based decision-making of introducing routine hepatitis A vaccination in  
18  
19 125 South Africa. The findings of this review contribute to the knowledge base that aims to enhance global  
20  
21 126 vaccination strategies against viral-associated ALF. As this is a systematic review, no patient involvement  
22  
23 127 was required; however, it is hoped that the findings of this review will help to highlight the burden that  
24  
25 128 ALF places on populations without routine vaccination.

25  
26

### 27 130 **Results**

28  
29 131 The initial database searches yielded 6,952 records, from which 3,545 duplicates were removed. A  
30  
31 132 further 3,263 were excluded following the screening of titles and abstracts (**Figure 1**). The full text of the  
32  
33 133 remaining 144 records were screened by JP and HH, from which 25 studies were deemed to meet the  
34  
35 134 final inclusion criteria. Twenty-four (96%) of the included studies were cohort studies. As detailed in  
36  
37 135 **Table 1**, the included studies were published between 2009 and 2017. Included studies were conducted  
38  
39 136 globally, with 7 studies and 3 studies conducted in India and Pakistan, respectively. The populations  
40  
41 137 represented by the included studies spanned all age groups and included participants primarily from  
42  
43 138 hospital settings. As the data in this review was sourced from a variety of countries, age groups and  
44  
45 139 settings, the heterogeneity was considerable and/or substantial for all results. Thus, we narratively and  
46  
47 140 graphically reported estimates of combined prevalence rates and the spreads of prevalence.

45  
46

### 47 142 **Vaccine-preventable viral-induced ALF**

48  
49 143 We narratively report the prevalence of HAV- and HBV-induced ALF by country immunization status. The  
50  
51 144 point prevalence of HAV-induced ALF in countries with no routine HAV immunization at the time of data  
52  
53 145 collection ranged from 2% to 81% with a combined of 27% (95% CI 13, 43), while the prevalence in  
54  
55 146 countries with routine HAV immunization at the time of data collection ranged from 1% to 2% with a  
56  
57 147 combined of 2% (95% CI 1, 3) (**Figure 2**). In Argentina, the prevalence of HAV-induced ALF prior to

5  
58

1  
2  
3 148 routine immunization was approximately 50% (95% CI 45, 55), compared to approximately 1% (95% CI 0,  
4 149 5) after immunization was introduced. The point prevalence of HBV-induced ALF in countries without  
5 150 universal HBV immunization at the time of data collection ranged from 16% to 27% with a combined of  
6 151 22% (95% CI 16, 30) (**Figure 3**). The point prevalence of HBV-induced ALF in countries with universal HBV  
7 152 immunization at the time of data collection ranged from 0% to 83% with a combined of 20% (95% CI = 8,  
8 153 35).

13 154

### 15 155 **ALF attributable to non-vaccine-preventable viral infections**

16 156 The point prevalence of HCV-induced ALF ranged from 2% to 25% with a combined of 9% (95% CI = 1,  
17 157 21) (**Supplementary Figure 1**). The point prevalence of HEV-induced ALF ranged from 3% to 70% with a  
18 158 combined of 32% (95% CI 24, 41) (**Supplementary Figure 2**). The point prevalence of HDV-, HHV/HSV-,  
19 159 CMV-, and EBV-induced ALF were estimated to have combined prevalences of 4% (95% CI 0, 13), 6%  
20 160 (95% CI 1, 12), 13% (95% CI 1, 35) and 6% (95% CI 0, 24), 10% (95% CI 2, 22), 2% (95% CI 0, 5), and 1%  
21 161 (95% CI 0, 5), respectively (**Supplementary Figure 3**). Data was not available to estimate the burden of  
22 162 ALF following infection with HDV, VZV, HPIVS, YFV, CA16 and/or HAdVs as outlined per the published  
23 163 protocol (11).

29 164

### 31 165 **Outcomes of viral-induced ALF**

32 166 The narratively reported outcomes of viral-induced ALF were found to be severe. The mortality rates  
33 167 associated with viral-induced ALF in lower-middle income countries ranged from 18% to 91% with a  
34 168 combined mortality rate of 50% (95% CI 36, 64) (**Figure 4A**). The mortality rates associated with viral-  
35 169 induced ALF in upper-middle income countries ranged 3% to 45% with a combined mortality rate of 26%  
36 170 (95% CI 1, 63) (**Figure 4A**). The mortality rates associated with viral-induced ALF in high income countries  
37 171 ranged from 12% to 40% with a combined mortality rate of 29% (95% CI 17, 43) (**Figure 4A**). The rate of  
38 172 encephalopathy associated with viral-induced ALF cases in children ranged from 69% to 100% with a  
39 173 combined rate of 89% (95% CI 79, 97) (**Figure 4B**). The need for liver transplantation with viral-  
40 174 associated ALF ranged from 4% to 62% with a combined rate of 25% (95% CI 6, 53) (**Figure 4B**). The need  
41 175 for renal transplant in viral-associated ALF cases ranged from 4% to 34% with a combined rate of 18%  
42 176 (95% CI 2, 43) (**Figure 4B**).

51 177

### 53 178 **Methodological quality**

54

55

56

57

58

59

1  
2  
3 179 Risk of bias scores were assigned by two reviewers (JP and HH) and are described in **Supplementary**  
4  
5 180 **Table 1**. Overall, a majority of the included studies were judged as having ‘low risk’ of bias. Only one  
6  
7 181 included study was judged as having ‘moderate risk’ of bias due to lack of clarity around the  
8  
9 182 representativeness of the study population to the national population, methods of participant selection  
10  
11 183 and methods employed to reduce the likelihood of non-response.  
12

184

### 13 185 **Discussion**

14  
15 186 This systematic review estimated the burden of ALF following infection with HAV, HBV, HCV, HEV,  
16  
17 187 HSV/HHV, CMV, EBV, and parvo-virus B19. The prevalence of HAV-induced ALF is markedly lower in  
18  
19 188 countries with routine HAV immunization while HEV was the most common etiological cause of viral-  
20  
21 189 induced ALF reported in this review. In addition, viral-induced ALF had poor outcomes as indicated by  
22  
23 190 high fatality rates, which seem to increase with poor economic status of the studied countries.  
24

191

25 192 The estimated prevalence of HAV-induced ALF in countries with routine HAV immunization was  
26  
27 193 markedly lower than the estimated prevalence in countries without routine HAV immunization. When  
28  
29 194 looking at countries with data before and after the introduction of routine HAV immunization, the  
30  
31 195 reduction of HAV-induced ALF due to vaccination is further highlighted. The combined prevalence of  
32  
33 196 HBV-induced ALF was the same in settings with or without universal HBV immunization. Countries  
34  
35 197 without universal HBV immunization programs are likely to have weak healthcare systems; thus, the  
36  
37 198 reported prevalence of HBV-induced ALF is assumed to be an underestimate of the true burden in these  
38  
39 199 populations due to weak routine testing and reporting systems. Currently, there is one HEV vaccine  
40  
41 200 (Hecolin) licensed in China that has shown promise with a high degree of efficacy in preventing HEV  
42  
43 201 genotype IV infection in healthy individuals 16 to 65 years (15). Further exploration of the efficacy of this  
44  
45 202 vaccine for prevention of infection with genotypes I and II in different populations should to explore it’s  
46  
47 203 application in different countries and HEV endemicity settings (16).  
48

204

49 205 This review estimated the mortality rate for viral-induced ALF to be approximately 50% in low- and  
50  
51 206 middle- income countries (LMICs) and less than 30% in upper-middle- and high-income countries.  
52  
53 207 Previous studies have estimated that mortality rates associated with ALF vary between 60% and 80%,  
54  
55 208 depending on the disease etiology as well as a patient’s access to care. Our review shows that although  
56  
57 209 viral-induced ALF still carries a significant mortality, though possibly lower than that reported for other  
58  
59 210 ALF etiologies (5, 6). Mortality data largely comes from hospitals with the capacity to diagnose viral-

7

1  
2  
3 211 induced ALF, thus deaths outside of the hospital system or ALF deaths without virological testing may  
4  
5 212 not be captured in these mortality estimates. Liver transplantation is required by approximately 25% of  
6  
7 213 viral-induced ALF cases and approximately 18% of viral-induced ALF cases required renal  
8  
9 214 transplantation, globally. In addition to general lack of resources for transplantation, a significant  
10  
11 215 proportion of potential candidates have contraindications to transplant related to poor socioeconomic  
12  
13 216 status in LMICs. The transplant data included in this review may only reflect successful and unsuccessful  
14  
15 217 transplants, not those that were needed but not carried out due to resource constraints or  
16  
17 218 contraindications.

18  
19 219  
20 220 This review is limited by lack of data for some of the viral etiologies of ALF including for VZV, HPIVs, YFV,  
21  
22 221 CA16 and/or HAdVs, which may have led to an underestimation of the global burden of viral-induced  
23  
24 222 ALF. Additionally, we believe that our findings underestimate the global burden of viral-induced ALF as  
25  
26 223 some important causes of ALF (e.g. HSV/HHV) are believed to be underrecognized as they require PCR  
27  
28 224 testing for diagnosis. The included studies also used varying methods of virus detection including  
29  
30 225 serology and molecular tests which further added to the heterogeneity in the results of our review. This  
31  
32 226 is a well-recognized limitation in studies of ALF where diagnostics are often limited by cost in under-  
33  
34 227 resourced regions where viral causes of ALF are more prevalent. The limited availability of data,  
35  
36 228 including lack of same country data on burden of disease before and after introduction of immunization,  
37  
38 229 hindered most of the planned sub-group analyses outlined in the study protocol. Where data were  
39  
40 230 available, high heterogeneity of the data led to planned meta-analyses and meta-regression analyses  
41  
42 231 not being possible. Lastly, the diversity of viruses attributable to ALF cases led to low statistical power in  
43  
44 232 meta-analyses conducted.

45  
46 233  
47 234 Future research should assess the burden of viral-induced ALF following infection with HDV, VZV, HPIVS,  
48  
49 235 YFV, CA16 and HAdVs. Collectively, high-quality data on all viral etiologies of ALF would allow for better  
50  
51 236 pooling of results. The review team encourages future studies to incorporate health economic estimates  
52  
53 237 and mathematical modelling where data permits to assist health policy decision-makers to better design  
54  
55 238 strategies for the prevention and management of viral-induced ALF. Epidemiological-economic  
56  
57 239 modelling of immunization against HAV, HBV and HEV may well show that introduction of vaccination  
58  
59 240 could lead to future cost savings in the long run due to prevented medical care and liver failure.

60 241

## 242 **Conclusions**

1  
2  
3 243 We successfully addressed the aim of the study although data on VZV, HPIVs, YFV, CA16 and/or HAdVs  
4  
5 244 were missing. Notwithstanding the noted limitations, it is clear that HAV, HBV and HEV – vaccine-  
6  
7 245 preventable ALF etiologies – account for a large proportion of ALF (approximately 21%, 20%, 32% of  
8  
9 246 viral-induced ALF cases, respectively). The burden of ALF that is associated with vaccine-preventable ALF  
10  
11 247 etiologies should be used in conjunction with other available key evidence to inform practice and  
12  
13 248 policies on immunization, particularly in LMICs. A majority of LMICs have established universal  
14  
15 249 vaccination against HBV. The World Health Organization has recently recommended the introduction of  
16  
17 250 an HBV birth dose which is aimed at elimination of the virus and, if successful, will subsequently reduce  
18  
19 251 the burden of HBV-induced ALF. Routine HAV immunization in LMICs, however, are lacking. More data is  
20  
21 252 urgently needed to guide routine use of the vaccine in prevention of morbidity and mortality caused by  
22  
23 253 the virus. Lastly, further applicability of HEV vaccines should be explored, especially in LMICs where  
24  
25 254 resources for managing viral-induced ALF are glaringly lacking.  
26  
27  
28  
29  
30  
31  
32  
33  
34  
35  
36  
37  
38  
39  
40  
41  
42  
43  
44  
45  
46  
47  
48  
49  
50  
51  
52  
53  
54  
55  
56  
57  
58  
59  
60

**256 Contributors**

257 JP, GDH, BK and RM conceived this study. JP implemented the review under the supervision of RM. JP  
258 and HSH performed the study search, screening and extraction of data under the guidance of RM. GDH  
259 and BK provided methodological expertise for this review. SS, LG, MS, and WS provided content  
260 expertise for this review and all authors will provided comments on the final manuscript before  
261 publication. JP is the guarantor of this review.

**262 Funding**

263 This research received no specific grant from any funding agency in the public, commercial or not-for-  
264 profit sectors. The Vaccines for Africa Initiative (VACFA) has funded the costs associated with the  
265 research and dissemination of the results, including publications.

**266 Competing interests**

267 None declared.

**268 Data availability**

269 All data were taken from published articles available in the public domain.

**270 Patient consent for publication**

271 Not required.

## REFERENCES

1. EASL Clinical Practical Guidelines on the management of acute (fulminant) liver failure. *Journal of Hepatology*. 2017;66(5):1047-81.
2. Morabito V, Adebayo D. Fulminant Hepatitis: Definitions, Causes and Management. *Health*. 2014;06(10):1038-48.
3. European Association for the Study of the Liver. Electronic address eee, Clinical practice guidelines p, Wendon J, Panel m, Cordoba J, Dhawan A, et al. EASL Clinical Practical Guidelines on the management of acute (fulminant) liver failure. *J Hepatol*. 2017;66(5):1047-81.
4. Cervio G, Trentadue J, D'Agostino D, Luque C, Giorgi M, Armoni J, et al. Decline in HAV-associated fulminant hepatic failure and liver transplant in children in Argentina after the introduction of a universal hepatitis A vaccination program. *Hepat Med*. 2011;3:99-106.
5. Bernal W, Auzinger G, Dhawan A, Wendon J. Acute liver failure. *Lancet*. 2010;376(Seminar):190-201.
6. Wlodzimirow KA, Eslami S, Abu-Hanna A, Nieuwoudt M, Chamuleau RA. Systematic review: acute liver failure - one disease, more than 40 definitions. *Aliment Pharmacol Ther*. 2012;35(11):1245-56.
7. Lee WM, Stravitz RT, Larson AM. Introduction to the revised American Association for the Study of Liver Diseases Position Paper on acute liver failure 2011. *Hepatology*. 2012;55(3):965-7.
8. Spearman CW, McCulloch M, Millar AJ, Burger H, Numanoglu A, Goddard E, et al. Liver transplantation at Red Cross War Memorial Children's Hospital. *South African medical journal = Suid-Afrikaanse tydskrif vir geneeskunde*. 2006;96(9 Pt 2):960-3.
9. O'Grady JG. Acute liver failure. *Postgrad Med J*. 2005;81(953):148-54.
10. O'Grady J. Liver transplantation for acute liver failure. *Best Pract Res Clin Gastroenterol*. 2012;26(1):27-33.
11. Patterson J, Hussey HS, Abdullahi LH, Silal S, Goddard L, Setshedi M, et al. The global epidemiology of viral-induced acute liver failure: a systematic review protocol. *BMJ Open*. 2019.
12. Balk E, Ching M, Chen M, Trikalinos T, L KWC. Assessing the Accuracy of Google Translate to Allow Data Extraction From Trials Published in Non-English Languages. Rockville, USA: Agency for Healthcare Research and Quality; 2013 Jan 2013. Contract No.: EHC145-EF.
13. Hoy D, Brooks P, Woolf A, Blyth F, March L, Bain C. Assessing risk of bias in prevalence studies: Modification of an existing tool and evidence of interrater agreement. *Journal of Clinical Epidemiology*. 2012;65:934-9.
14. Werfalli M, Musekiwa A, Engel ME, Ross I, Kengne AP, Levitt NS. The prevalence of type 2 diabetes mellitus among older people in Africa: a systematic review study protocol. *BMJ Open*. 2014.
15. Li SW, Zhao Q, Wu T, Chen S, Zhang J, Xia NS. The development of a recombinant hepatitis E vaccine HEV 239. *Hum Vaccin Immunother*. 2015;11(4):908-14.
16. Wu X, Chen P, Lin H, Hao X, Liang Z. Hepatitis E virus: Current epidemiology and vaccine. *Human Vaccines and Immunotherapeutics*. 2016;12(10):2603-10.
17. Alam S, Azam G, Mustafa G, Azad AK, Haque I, Gani S, et al. Natural course of fulminant hepatic failure: the scenario in Bangladesh and the differences from the west. *Saudi J Gastroenterol*. 2009;15(4):229-33.
18. Asim M, Singla R, Gupta RK, Kar P. Clinical & molecular characterization of human TT virus in different liver diseases. *Indian Journal of Medical Research*. 2010;131(4):545-54.
19. Bechmann LP, Manka P, Best J, Saner FH, Paul A, Canbay A, et al. Drug-induced liver injury as predominant cause of acute liver failure in a monocenter study. *Deutsche Medizinische Wochenschrift*. 2014;139(17):878-82.
20. Bhatia V, Dhawan A, Arora NK, Mathur P, Das MK, Irshad M. Urinary potassium loss in children with acute liver failure and acute viral hepatitis. *J Pediatr Gastroenterol Nutr*. 2013;57(1):102-8.
21. Borkakoti JH, R. K.; Mohammad, A.; Kumar, A.; Kar, P. Does high viral load of hepatitis E virus influence the severity and prognosis of acute liver failure during pregnancy? *Journal of Medical Virology*. 2013;85(4):620-6.
22. Bravo LC, Gregorio GV, Shafi F, Bock HL, Boudville I, Liu Y, et al. Etiology, incidence and outcomes of acute hepatic failure in 0-18 year old Filipino children. *Southeast Asian J Trop Med Public Health*. 2012;43(3):764-72.
23. Das AK, Begum T, Kar P, Dutta A. Profile of Acute Liver Failure from North-east India and Its Differences from other Parts of the Country. *Euroasian J Hepatogastroenterol*. 2016;6(2):111-5.
24. Gupta P, Mittal M, Bhat NK, Agarwal RK, Gupta P, Mittal G. A hospital based retrospective study on hepatotropic viruses as a cause of acute viral hepatitis in children in Uttarakhand, India. *Indian Journal of Community Health*. 2015;27(4):451-5.
25. Ho CM, Lee CH, Wang JY, Lee PH, Lai HS, Hu RH. Nationwide longitudinal analysis of acute liver failure in taiwan. *Medicine (Baltimore)*. 2014;93(4):e35.
26. Latif N, Mehmood K. Risk factors for fulminant hepatic failure and their relation with outcome in children. *J Pak Med Assoc*. 2010;60(3):175-8.
27. Mamun AI M, Rahman S, Khan M, Karim F. HEV infection as an aetiologic factor for acute hepatitis: experience from a tertiary hospital in Bangladesh. *J Health Popul Nutr*. 2009;27(1):14-9.
28. Manka P, Bechmann LP, Coombes JD, Thodou V, Schlattjan M, Kahraman A, et al. Hepatitis E Virus Infection as a Possible Cause of Acute Liver Failure in Europe. *Clin Gastroenterol Hepatol*. 2015;13(10):1836-42.e2; quiz e157-8.
29. Mendizabal MM, S.; Videla, M. G.; Anders, M.; Zerega, A.; Balderramo, D. C.; Chan, D.; Barrabino, M.; Gil, O.; Mastai, R.; Yantorno, S.; Gadano, A.; Silva, M. O. Changing etiologies and outcomes of acute liver failure: Perspectives from 6 transplant centers in Argentina. *Liver Transplantation*. 2014;20(4):483-9.
30. Mishra SB, J.; Kumar, S.; Kar, P. Role of HEV antigen detection in HEV-related acute viral hepatitis and acute liver failure. *Journal of Medical Virology*. 2016;88(12):2179-85.
31. Mumtaz K, Azam Z, Hamid S, Abid S, Memon S, Ali Shah H, et al. Role of N-acetylcysteine in adults with non-acetaminophen-induced acute liver failure in a center without the facility of liver transplantation. *Hepatology International*. 2009;3(4):563-70.
32. Pandit A, Mathew LG, Bavdekar A, Mehta S, Ramakrishnan G, Datta S, et al. Hepatotropic viruses as etiological agents of acute liver failure and related-outcomes among children in India: a retrospective hospital-based study. *BMC Res Notes*. 2015;8:381.



- 1  
2  
3 33. Poovorawan Y, Chongsrisawat V, Shafi F, Boudville I, Liu Y, Hutagalung Y, et al. Acute hepatic failure among hospitalized Thai children. *Southeast Asian J Trop Med Public Health*. 2013;44(1):50-3.
- 4 34. Schwarz KBO, Dominic Dell; Lobritto, Steven J.; Lopez, M. James; Rodriguez-Baez, Norberto; Yazigi, Nada A.; Belle, Steven H.; Zhang, Song; Squires, Robert H.; for the Pediatric Acute Liver Failure Study, Group. Analysis of Viral Testing in Nonacetaminophen Pediatric Acute Liver Failure. *Journal of Pediatric Gastroenterology & Nutrition*. 2014;59(5):616-23.
- 5 35. Shalimar, Kedia S, Gunjan D, Sonika U, Mahapatra SJ, Nayak B, et al. Acute Liver Failure Due to Hepatitis E Virus Infection Is Associated with Better Survival than Other Etiologies in Indian Patients. *Dig Dis Sci*. 2017;62(4):1058-66.
- 6 36. Silverio CE, Smithen-Romany CY, Hondal NI, Diaz HO, Castellanos MI, Sosa O. Acute liver failure in Cuban children. *MEDICC Rev*. 2015;17(1):48-54.
- 7 37. Somasekar SL, D.; Rule, J.; Naccache, S. N.; Stone, M.; Busch, M. P.; S.; ers, C.; Lee, W. M.; Chiu, C. Y. Viral Surveillance in Serum Samples from Patients with Acute Liver Failure by Metagenomic Next-Generation Sequencing. *Clinical Infectious Diseases*. 2017;65(9):1477-85.
- 8 38. Uddin Jamro BMC, S.; Mal Makheja, P.; Ahmed Soomro, A. Etiology, outcome and risk factors for fulminant hepatic failure in children at a tertiary care hospital, Sukkur, Pakistan. *Rawal Medical Journal*. 2013;38(3):219-22.
- 9 39. Tsunoda T, Inui A, Iwasawa K, Oikawa M, Sogo T, Komatsu H, et al. Acute liver dysfunction not resulting from hepatitis virus in immunocompetent children. *Pediatr Int*. 2017;59(5):551-6.
- 10 40. Zhao P, Wang CY, Liu WW, Wang X, Yu LM, Sun YR. Acute liver failure in Chinese children: a multicenter investigation. *Hepatobiliary Pancreat Dis Int*. 2014;13(3):276-80.
- 11  
12  
13  
14  
15  
16  
17  
18  
19  
20  
21  
22  
23  
24  
25  
26  
27  
28  
29  
30  
31  
32  
33  
34  
35  
36  
37  
38  
39  
40  
41  
42  
43  
44  
45  
46  
47  
48  
49  
50  
51  
52  
53  
54  
55  
56  
57  
58  
59  
60

**FIGURE LEGENDS**

Figure 1: Flow diagram for selection of studies

Figure 2: Prevalence of HAV-induced ALF by country HAV immunization status

- Abbreviations: HAV = hepatitis A virus, ALF = acute liver failure, CI = confidence interval, I2 = heterogeneity statistic

Figure 3: Prevalence of HBV-induced ALF by country HBV immunization status

- Abbreviations: HBV = hepatitis B virus, ALF = acute liver failure, CI = confidence interval, I2 = heterogeneity statistic

Figure 4: Prevalence of outcomes associated with viral-induced ALF

- Abbreviations: ALF = acute liver failure, CI = confidence interval, I2=heterogeneity statistic, NA = not applicable

**TABLES**

| Table 1: Characteristics of included studies |                      |                                                                                                                                                                   |            |              |                          |                        |                                                                                                                                                                                                                                                                  |
|----------------------------------------------|----------------------|-------------------------------------------------------------------------------------------------------------------------------------------------------------------|------------|--------------|--------------------------|------------------------|------------------------------------------------------------------------------------------------------------------------------------------------------------------------------------------------------------------------------------------------------------------|
| Study                                        | Study Design         | Aim                                                                                                                                                               | Country    | Income Level | Start of Data Collection | End of Data Collection | ALF Case Definition                                                                                                                                                                                                                                              |
| Alam et al., 2009 (17)                       | Prospective cohort   | To evaluate the etiology, complications, and outcome of FHF                                                                                                       | Bangladesh | Lower-middle | 3-Nov                    | 8-May                  | Occurrence of hepatic encephalopathy within 8 weeks of onset of jaundice in patients with no previous liver disease and the presence of coagulopathy as proved by a PT > 15 s or INR > 1.5                                                                       |
| Asim et al., 2009 (18)                       | Cross-sectional      | To analyze serum samples from patients with ALF for hepatitis A-G viral markers                                                                                   | India      | Lower-middle | 1-Jun                    | 4-May                  | Patient become deeply jaundiced and went into hepatic encephalopathy within 8 weeks of onset of the disease, with no past history of chronic hepatitis                                                                                                           |
| Bechmann et al., 2014 (19)                   | Retrospective cohort | To identify currently predominant etiologies of ALF at a transplant center                                                                                        | Germany    | High         | 1-Jan                    | 12-Feb                 | <i>Acute Liver Failure Study Group Germany</i> case definition: INR > 1.5 and encephalopathy of any grade. Pre-existing liver disease and systemic cause of liver failure were excluded                                                                          |
| Bhatia et al., 2013 (20)                     | Prospective cohort   | To analyze clinical features, liver function tests, hepatitis viral markers and clinical outcomes in patients with ALF                                            | India      | Lower-middle | Jun-99                   | 1-Jan                  | Development of hepatic encephalopathy within 26 weeks of the first symptoms of acute hepatitis-like illness without any history of underlying liver disease                                                                                                      |
| Borkakoti et al., 2013 (21)                  | Prospective cohort   | To determine the viral load of HEV and its association with the disease severity in patients with ALF in comparison with patients with ALF due to other hepatides | India      | Lower-middle | 6-Jan                    | 11-Dec                 | Development of encephalopathy within 8 weeks of the onset of jaundice without any past history of chronic liver disease; diagnosed as a self-limiting disease and a serum aspartate aminotransferase elevation of at least fivefold or clinical jaundice or both |

|    |                         |                                    |                                                                                                               |             |              |        |        |                                                                                                                                                                                                                                                                                 |
|----|-------------------------|------------------------------------|---------------------------------------------------------------------------------------------------------------|-------------|--------------|--------|--------|---------------------------------------------------------------------------------------------------------------------------------------------------------------------------------------------------------------------------------------------------------------------------------|
| 1  |                         |                                    |                                                                                                               |             |              |        |        |                                                                                                                                                                                                                                                                                 |
| 2  |                         |                                    |                                                                                                               |             |              |        |        |                                                                                                                                                                                                                                                                                 |
| 3  |                         |                                    |                                                                                                               |             |              |        |        |                                                                                                                                                                                                                                                                                 |
| 4  |                         |                                    |                                                                                                               |             |              |        |        | Onset of coagulopathy and/or                                                                                                                                                                                                                                                    |
| 5  |                         |                                    |                                                                                                               |             |              |        |        | encephalopathy $\leq 4$ weeks                                                                                                                                                                                                                                                   |
| 6  |                         |                                    |                                                                                                               |             |              |        |        | after the onset of symptoms,                                                                                                                                                                                                                                                    |
| 7  | Bravo et al., 2012 (22) | Prospective & retrospective cohort | To investigate the etiology, outcomes and incidence of AHF among children 0-18 years old                      | Philippines | Lower-middle | Jan-00 | 6-Dec  | a prothrombin time > 2, an increased bilirubin and evidence for liver failure complicated by encephalopathy                                                                                                                                                                     |
| 11 |                         |                                    |                                                                                                               |             |              |        |        |                                                                                                                                                                                                                                                                                 |
| 12 |                         |                                    |                                                                                                               |             |              |        |        |                                                                                                                                                                                                                                                                                 |
| 13 |                         |                                    |                                                                                                               |             |              |        |        | <i>Mieli-Vergani</i> case definition:                                                                                                                                                                                                                                           |
| 14 |                         |                                    |                                                                                                               |             |              |        |        | a multisystem disorder in which severe impairment of liver function, with or without encephalopathy, occurs in association with hepatocellular necrosis in a patient with or without recognized underlying chronic liver disease ( <b>Cheeseman &amp; Mieli-Vergani, 2004</b> ) |
| 15 |                         |                                    |                                                                                                               |             |              |        |        |                                                                                                                                                                                                                                                                                 |
| 16 |                         |                                    |                                                                                                               |             |              |        |        |                                                                                                                                                                                                                                                                                 |
| 17 |                         |                                    |                                                                                                               |             |              |        |        |                                                                                                                                                                                                                                                                                 |
| 18 | Cervio et al., 2011 (4) | Retrospective cohort               | To investigate the impact of HAV UI on the trends in the occurrence of FHF in children                        | Argentina   | High         | Mar-93 | 5-Jul  |                                                                                                                                                                                                                                                                                 |
| 19 |                         |                                    |                                                                                                               |             |              |        |        |                                                                                                                                                                                                                                                                                 |
| 20 |                         |                                    |                                                                                                               |             |              |        |        |                                                                                                                                                                                                                                                                                 |
| 21 |                         |                                    |                                                                                                               |             |              |        |        |                                                                                                                                                                                                                                                                                 |
| 22 |                         |                                    |                                                                                                               |             |              |        |        |                                                                                                                                                                                                                                                                                 |
| 23 |                         |                                    |                                                                                                               |             |              |        |        |                                                                                                                                                                                                                                                                                 |
| 24 |                         |                                    |                                                                                                               |             |              |        |        |                                                                                                                                                                                                                                                                                 |
| 25 |                         |                                    |                                                                                                               |             |              |        |        |                                                                                                                                                                                                                                                                                 |
| 26 | Das et al., 2016 (23)   | Prospective cohort                 | To determine the profile of ALF etiologies                                                                    | India       | Lower-middle | 7-Jan  | 15-Dec | History of development of encephalopathy within 8 weeks of disease onset                                                                                                                                                                                                        |
| 27 |                         |                                    |                                                                                                               |             |              |        |        |                                                                                                                                                                                                                                                                                 |
| 28 |                         |                                    |                                                                                                               |             |              |        |        |                                                                                                                                                                                                                                                                                 |
| 29 |                         |                                    |                                                                                                               |             |              |        |        |                                                                                                                                                                                                                                                                                 |
| 30 |                         |                                    |                                                                                                               |             |              |        |        | Elevated ALT levels or AST of at least five-fold with clinical jaundice and without evidence of chronic liver disease.                                                                                                                                                          |
| 31 |                         |                                    |                                                                                                               |             |              |        |        | Patients who had INR > 1.5 with encephalopathy or INR > 2 without encephalopathy                                                                                                                                                                                                |
| 32 | Gupta et al., 2015 (24) | Retrospective cohort               | To determine the profile of Hepatitis A, B, C and E as a cause of AHF in children in a tertiary care hospital | India       | Lower-middle | 11-Jan | 14-Dec |                                                                                                                                                                                                                                                                                 |
| 33 |                         |                                    |                                                                                                               |             |              |        |        |                                                                                                                                                                                                                                                                                 |
| 34 |                         |                                    |                                                                                                               |             |              |        |        |                                                                                                                                                                                                                                                                                 |
| 35 |                         |                                    |                                                                                                               |             |              |        |        |                                                                                                                                                                                                                                                                                 |
| 36 |                         |                                    |                                                                                                               |             |              |        |        |                                                                                                                                                                                                                                                                                 |
| 37 |                         |                                    |                                                                                                               |             |              |        |        |                                                                                                                                                                                                                                                                                 |
| 38 |                         |                                    |                                                                                                               |             |              |        |        |                                                                                                                                                                                                                                                                                 |
| 39 |                         |                                    |                                                                                                               |             |              |        |        | International Classification of Diseases, Ninth Revision, Clinical Modification (ICD-9-CM) code 570.0                                                                                                                                                                           |
| 40 | Ho et al., 2014 (25)    | Prospective cohort                 | To investigate the incidence, etiology, outcomes, and prognostic factors of ALF                               | Taiwan      | High income  | 5-Jan  | 7-Sep  |                                                                                                                                                                                                                                                                                 |
| 41 |                         |                                    |                                                                                                               |             |              |        |        |                                                                                                                                                                                                                                                                                 |
| 42 |                         |                                    |                                                                                                               |             |              |        |        |                                                                                                                                                                                                                                                                                 |
| 43 |                         |                                    |                                                                                                               |             |              |        |        |                                                                                                                                                                                                                                                                                 |
| 44 |                         |                                    |                                                                                                               |             |              |        |        |                                                                                                                                                                                                                                                                                 |
| 45 |                         |                                    |                                                                                                               |             |              |        |        | Development of encephalopathy within 8 weeks of the onset of jaundice having evidence of coagulopathy i.e. PT deranges > 4 s of control and deranged liver function i.e. TSB > 1.5 mg/dl, AT > 40 IU/L                                                                          |
| 46 |                         |                                    |                                                                                                               |             |              |        |        |                                                                                                                                                                                                                                                                                 |
| 47 |                         |                                    |                                                                                                               |             |              |        |        |                                                                                                                                                                                                                                                                                 |
| 48 | Latif et al., 2010 (26) | Prospective cohort                 | To identify the risk factors for FHF and their relationship with the outcome in children                      | Pakistan    | Lower-middle | 6-Sep  | 7-Feb  |                                                                                                                                                                                                                                                                                 |
| 49 |                         |                                    |                                                                                                               |             |              |        |        |                                                                                                                                                                                                                                                                                 |
| 50 |                         |                                    |                                                                                                               |             |              |        |        |                                                                                                                                                                                                                                                                                 |
| 51 |                         |                                    |                                                                                                               |             |              |        |        |                                                                                                                                                                                                                                                                                 |
| 52 |                         |                                    |                                                                                                               |             |              |        |        |                                                                                                                                                                                                                                                                                 |
| 53 |                         |                                    |                                                                                                               |             |              |        |        |                                                                                                                                                                                                                                                                                 |
| 54 |                         |                                    |                                                                                                               |             |              |        |        |                                                                                                                                                                                                                                                                                 |
| 55 |                         |                                    |                                                                                                               |             |              |        |        |                                                                                                                                                                                                                                                                                 |
| 56 |                         |                                    |                                                                                                               |             |              |        |        |                                                                                                                                                                                                                                                                                 |
| 57 |                         |                                    |                                                                                                               |             |              |        |        |                                                                                                                                                                                                                                                                                 |
| 58 |                         |                                    |                                                                                                               |             |              |        |        |                                                                                                                                                                                                                                                                                 |
| 59 |                         |                                    |                                                                                                               |             |              |        |        |                                                                                                                                                                                                                                                                                 |
| 60 |                         |                                    |                                                                                                               |             |              |        |        |                                                                                                                                                                                                                                                                                 |

|    |                              |                                                   |                                                                                                                                |            |              |        |        |                                                                                                                                                                                                                        |
|----|------------------------------|---------------------------------------------------|--------------------------------------------------------------------------------------------------------------------------------|------------|--------------|--------|--------|------------------------------------------------------------------------------------------------------------------------------------------------------------------------------------------------------------------------|
| 1  |                              |                                                   |                                                                                                                                |            |              |        |        |                                                                                                                                                                                                                        |
| 2  |                              |                                                   |                                                                                                                                |            |              |        |        |                                                                                                                                                                                                                        |
| 3  |                              |                                                   |                                                                                                                                |            |              |        |        |                                                                                                                                                                                                                        |
| 4  |                              |                                                   |                                                                                                                                |            |              |        |        | Previously healthy patients                                                                                                                                                                                            |
| 5  |                              |                                                   |                                                                                                                                |            |              |        |        | who presented with severe                                                                                                                                                                                              |
| 6  |                              |                                                   |                                                                                                                                |            |              |        |        | impairment of hepato-cellular                                                                                                                                                                                          |
| 7  | Mamun et al., 2009 (27)      | Retrospective cohort                              | To assess the burden of HEV as a cause of ALF                                                                                  | Bangladesh | Lower-middle | 4-Jun  | 6-Dec  | function, i.e. encephalopathy, coagulopathy, and jaundice, within six months of onset of symptoms                                                                                                                      |
| 8  |                              |                                                   |                                                                                                                                |            |              |        |        |                                                                                                                                                                                                                        |
| 9  |                              |                                                   |                                                                                                                                |            |              |        |        |                                                                                                                                                                                                                        |
| 10 |                              |                                                   |                                                                                                                                |            |              |        |        |                                                                                                                                                                                                                        |
| 11 |                              |                                                   |                                                                                                                                |            |              |        |        |                                                                                                                                                                                                                        |
| 12 |                              |                                                   |                                                                                                                                |            |              |        |        | Significant liver dysfunction with pathologically increased laboratory parameters [AST, ALT, AP], an existing coagulopathy in terms of an INR > 1.5, and with the concomitant presence of any degree of encephalopathy |
| 13 |                              |                                                   |                                                                                                                                |            |              |        |        |                                                                                                                                                                                                                        |
| 14 |                              |                                                   |                                                                                                                                |            |              |        |        |                                                                                                                                                                                                                        |
| 15 | Manka et al., 2015 (28)      | Retrospective cohort                              | To investigate the causes of previously diagnosed indeterminate cases ALF                                                      | Germany    | High         | 6-Nov  | 13-Dec |                                                                                                                                                                                                                        |
| 16 |                              |                                                   |                                                                                                                                |            |              |        |        |                                                                                                                                                                                                                        |
| 17 |                              |                                                   |                                                                                                                                |            |              |        |        |                                                                                                                                                                                                                        |
| 18 |                              |                                                   |                                                                                                                                |            |              |        |        |                                                                                                                                                                                                                        |
| 19 |                              |                                                   |                                                                                                                                |            |              |        |        |                                                                                                                                                                                                                        |
| 20 |                              |                                                   |                                                                                                                                |            |              |        |        |                                                                                                                                                                                                                        |
| 21 |                              |                                                   |                                                                                                                                |            |              |        |        |                                                                                                                                                                                                                        |
| 22 |                              |                                                   |                                                                                                                                |            |              |        |        | Presence of coagulopathy [INR > 1.5 or prothrombin index < 50%] and any grade of HE within 26 weeks of the first symptoms without a known underlying liver disease                                                     |
| 23 |                              |                                                   |                                                                                                                                |            |              |        |        |                                                                                                                                                                                                                        |
| 24 | Mendizabal et al., 2014 (29) | Retrospective cohort                              | To determine the causes and short-term outcomes of ALF                                                                         | Argentina  | High         | 5-Jun  | 11-Dec |                                                                                                                                                                                                                        |
| 25 |                              |                                                   |                                                                                                                                |            |              |        |        |                                                                                                                                                                                                                        |
| 26 |                              |                                                   |                                                                                                                                |            |              |        |        |                                                                                                                                                                                                                        |
| 27 |                              |                                                   |                                                                                                                                |            |              |        |        |                                                                                                                                                                                                                        |
| 28 |                              |                                                   |                                                                                                                                |            |              |        |        |                                                                                                                                                                                                                        |
| 29 |                              |                                                   |                                                                                                                                |            |              |        |        |                                                                                                                                                                                                                        |
| 30 |                              |                                                   |                                                                                                                                |            |              |        |        | Any evidence of coagulation abnormality, generally INR >1.5 and any degree of mental alteration (encephalopathy) without pre-existing cirrhosis and with an illness of < 4 weeks duration                              |
| 31 |                              |                                                   |                                                                                                                                |            |              |        |        |                                                                                                                                                                                                                        |
| 32 | Mishra et al., 2016 (30)     | Retrospective cohort                              | To assess the relative efficacy of HEV antigen detection by ELISA in patients with ALF                                         | India      | Lower-middle | 13-Nov | 15-Jan |                                                                                                                                                                                                                        |
| 33 |                              |                                                   |                                                                                                                                |            |              |        |        |                                                                                                                                                                                                                        |
| 34 |                              |                                                   |                                                                                                                                |            |              |        |        |                                                                                                                                                                                                                        |
| 35 |                              |                                                   |                                                                                                                                |            |              |        |        |                                                                                                                                                                                                                        |
| 36 |                              |                                                   |                                                                                                                                |            |              |        |        |                                                                                                                                                                                                                        |
| 37 |                              |                                                   |                                                                                                                                |            |              |        |        |                                                                                                                                                                                                                        |
| 38 |                              |                                                   |                                                                                                                                |            |              |        |        |                                                                                                                                                                                                                        |
| 39 |                              |                                                   |                                                                                                                                |            |              |        |        |                                                                                                                                                                                                                        |
| 40 | Mumtaz et al., 2009 (31)     | Prospective cohort compared to historical control | To assess the etiology, prothrombin time (PT), alanine aminotransferase, creatinine, albumin for non-acetaminophen-induced ALF | Pakistan   | Lower middle | Jan-00 | 7-Mar  | Rapid development of acute liver injury with impaired synthetic function and encephalopathy in a person who previously had a normal liver                                                                              |
| 41 |                              |                                                   |                                                                                                                                |            |              |        |        |                                                                                                                                                                                                                        |
| 42 |                              |                                                   |                                                                                                                                |            |              |        |        |                                                                                                                                                                                                                        |
| 43 |                              |                                                   |                                                                                                                                |            |              |        |        |                                                                                                                                                                                                                        |
| 44 |                              |                                                   |                                                                                                                                |            |              |        |        |                                                                                                                                                                                                                        |
| 45 |                              |                                                   |                                                                                                                                |            |              |        |        |                                                                                                                                                                                                                        |
| 46 |                              |                                                   |                                                                                                                                |            |              |        |        |                                                                                                                                                                                                                        |
| 47 |                              |                                                   |                                                                                                                                |            |              |        |        |                                                                                                                                                                                                                        |
| 48 |                              |                                                   |                                                                                                                                |            |              |        |        |                                                                                                                                                                                                                        |
| 49 |                              |                                                   |                                                                                                                                |            |              |        |        | Onset of encephalopathy $\leq$ 28 days after the onset of symptoms with INR > 2 and increased bilirubin complicated by encephalopathy in patients                                                                      |
| 50 | Pandit et al., 2015 (32)     | Retrospective cohort                              | To assess the frequency of hepatotropic viruses as etiological agents of ALF                                                   | India      | Lower-middle | 3-Jan  | 5-Dec  |                                                                                                                                                                                                                        |
| 51 |                              |                                                   |                                                                                                                                |            |              |        |        |                                                                                                                                                                                                                        |
| 52 |                              |                                                   |                                                                                                                                |            |              |        |        |                                                                                                                                                                                                                        |
| 53 |                              |                                                   |                                                                                                                                |            |              |        |        |                                                                                                                                                                                                                        |
| 54 |                              |                                                   |                                                                                                                                |            |              |        |        |                                                                                                                                                                                                                        |
| 55 |                              |                                                   |                                                                                                                                |            |              |        |        |                                                                                                                                                                                                                        |
| 56 |                              |                                                   |                                                                                                                                |            |              |        |        |                                                                                                                                                                                                                        |
| 57 |                              |                                                   |                                                                                                                                |            |              |        |        |                                                                                                                                                                                                                        |
| 58 |                              |                                                   |                                                                                                                                |            |              |        |        |                                                                                                                                                                                                                        |
| 59 |                              |                                                   |                                                                                                                                |            |              |        |        |                                                                                                                                                                                                                        |
| 60 |                              |                                                   |                                                                                                                                |            |              |        |        |                                                                                                                                                                                                                        |

|                               |                                         |                                                                                           |               |              |        |        |                                                                                                                                                                                                                                                                                                                                   |
|-------------------------------|-----------------------------------------|-------------------------------------------------------------------------------------------|---------------|--------------|--------|--------|-----------------------------------------------------------------------------------------------------------------------------------------------------------------------------------------------------------------------------------------------------------------------------------------------------------------------------------|
|                               |                                         |                                                                                           |               |              |        |        | without a previous history of liver disease                                                                                                                                                                                                                                                                                       |
| Poovorawan (33) et al., 2013  | Prospective cohort                      | To determine the causes and outcomes of Thai children with AHF                            | Thailand      | Upper-middle | 2-Jan  | 5-Sep  | <i>International Association for the Study of the Liver</i> case definition: (Tandon et al, 1999)                                                                                                                                                                                                                                 |
| Schwarz et al., 2014 (34)     | Retrospective cohort - Patient registry | To analyzed results of viral testing among non-acetaminophen ALF study participants       | USA/Canada/UK | High         | Dec-99 | 12-Dec | No known evidence of chronic liver disease, with evidence of acute liver injury, and hepatic-based coagulopathy not corrected by vitamin K with the follow parameters: PT $\geq$ 15 s or INR $\geq$ 1.5 in the presence of clinical HE or a PT $\geq$ 20 s or INR $\geq$ 2.0 regardless of the presence or absence of clinical HE |
| Shalimar et al., 2017 (35)    | Retrospective cohort                    | To assess the differences in the course of HEV-ALF as compared to other etiologies of ALF | India         | Lower middle | Jan-86 | 15-Dec | <i>International Association for the Study of Liver</i> (IASL) case definition: Occurrence of encephalopathy within 4 weeks from the onset of symptoms in the absence of preexisting liver disease                                                                                                                                |
| Silverio et al., 2015 (36)    | Retrospective cohort                    | To describe the clinical features of children treated for ALF                             | Cuba          | Upper-middle | 5-Jan  | 11-Dec | Evidence of liver damage in the absence of prior known chronic liver disease; altered coagulation, expressed as PT $>$ 15 s with encephalopathy; or PT $>$ 20 s with or without encephalopathy—all this within eight weeks of onset of clinical symptoms                                                                          |
| Somasekar et al., 2017 (37)   | Retrospective cohort                    | To investigate the causes of previously diagnosed indeterminate cases ALF                 | United States | High         | Jan-98 | 10-Dec | <i>United States Acute Liver Failure Study Group</i> case definition                                                                                                                                                                                                                                                              |
| Uddin Jamro et al., 2013 (38) | Retrospective cohort                    | To study the etiology, outcome and risk factors for FHF in children at                    | Pakistan      | Lower-middle | 7-Jul  | 12-Jun | Presence of acute liver failure (coagulopathy PT $>$ 20 s or INR $>$ 2), HE without pre-existing liver disease, within 8                                                                                                                                                                                                          |

|                                                                                                                                                                                                                                                                                                                                                                                                                                                                                                                                            |                      |                                                                                                                                   |       |        |       |        |  |                                                                                                                                                                                         |
|--------------------------------------------------------------------------------------------------------------------------------------------------------------------------------------------------------------------------------------------------------------------------------------------------------------------------------------------------------------------------------------------------------------------------------------------------------------------------------------------------------------------------------------------|----------------------|-----------------------------------------------------------------------------------------------------------------------------------|-------|--------|-------|--------|--|-----------------------------------------------------------------------------------------------------------------------------------------------------------------------------------------|
|                                                                                                                                                                                                                                                                                                                                                                                                                                                                                                                                            |                      | a tertiary care hospital                                                                                                          |       |        |       |        |  | weeks of the onset of clinical liver disease                                                                                                                                            |
| Tsunoda et al., 2017 (39)                                                                                                                                                                                                                                                                                                                                                                                                                                                                                                                  | Prospective cohort   | To identify the roles of CMV, EBV and HHV in immunocompetent children with acute liver failure not resulting from hepatitis virus | Japan | High   | 7-Jan | 13-Dec |  | Liver dysfunction with elevated AST and ALT > 30 IU/L                                                                                                                                   |
| Zhao et al., 2014 (40)                                                                                                                                                                                                                                                                                                                                                                                                                                                                                                                     | Retrospective cohort | To investigate etiologies and outcomes of children with ALF                                                                       | China | Middle | 7-Jan | 12-Dec |  | Coagulopathy [PTA $\leq$ 40% or INR $\geq$ 1.5 excluding hematologic diseases] and jaundice [Tbil $\geq$ 171 $\mu$ mol/L] within 4 weeks in a child without pre-existing liver diseases |
| <p><b>Abbreviations:</b> ALF = acute liver failure; FHF = fulminant hepatic failure; AHF = acute hepatic failure; HEV = hepatitis E virus; CMV = cytomegalovirus; EBV = Epstein Barr virus; HHV = human herpesvirus; ELISA = enzyme-linked immunosorbent assay; INR = international normalized ratio; PT = prothrombin time; s = second; TSB = total serum bilirubin; HE = hepatic encephalopathy; AST = aspartate aminotransferase; ALT = alanine aminotransferase; AP = alkaline phosphatase; PTA = plasma thromboplastin antecedent</p> |                      |                                                                                                                                   |       |        |       |        |  |                                                                                                                                                                                         |

Figure 1: Flow diagram for selection of studies





Figure 2: Prevalence of HAV-induced ALF by country HAV immunization status

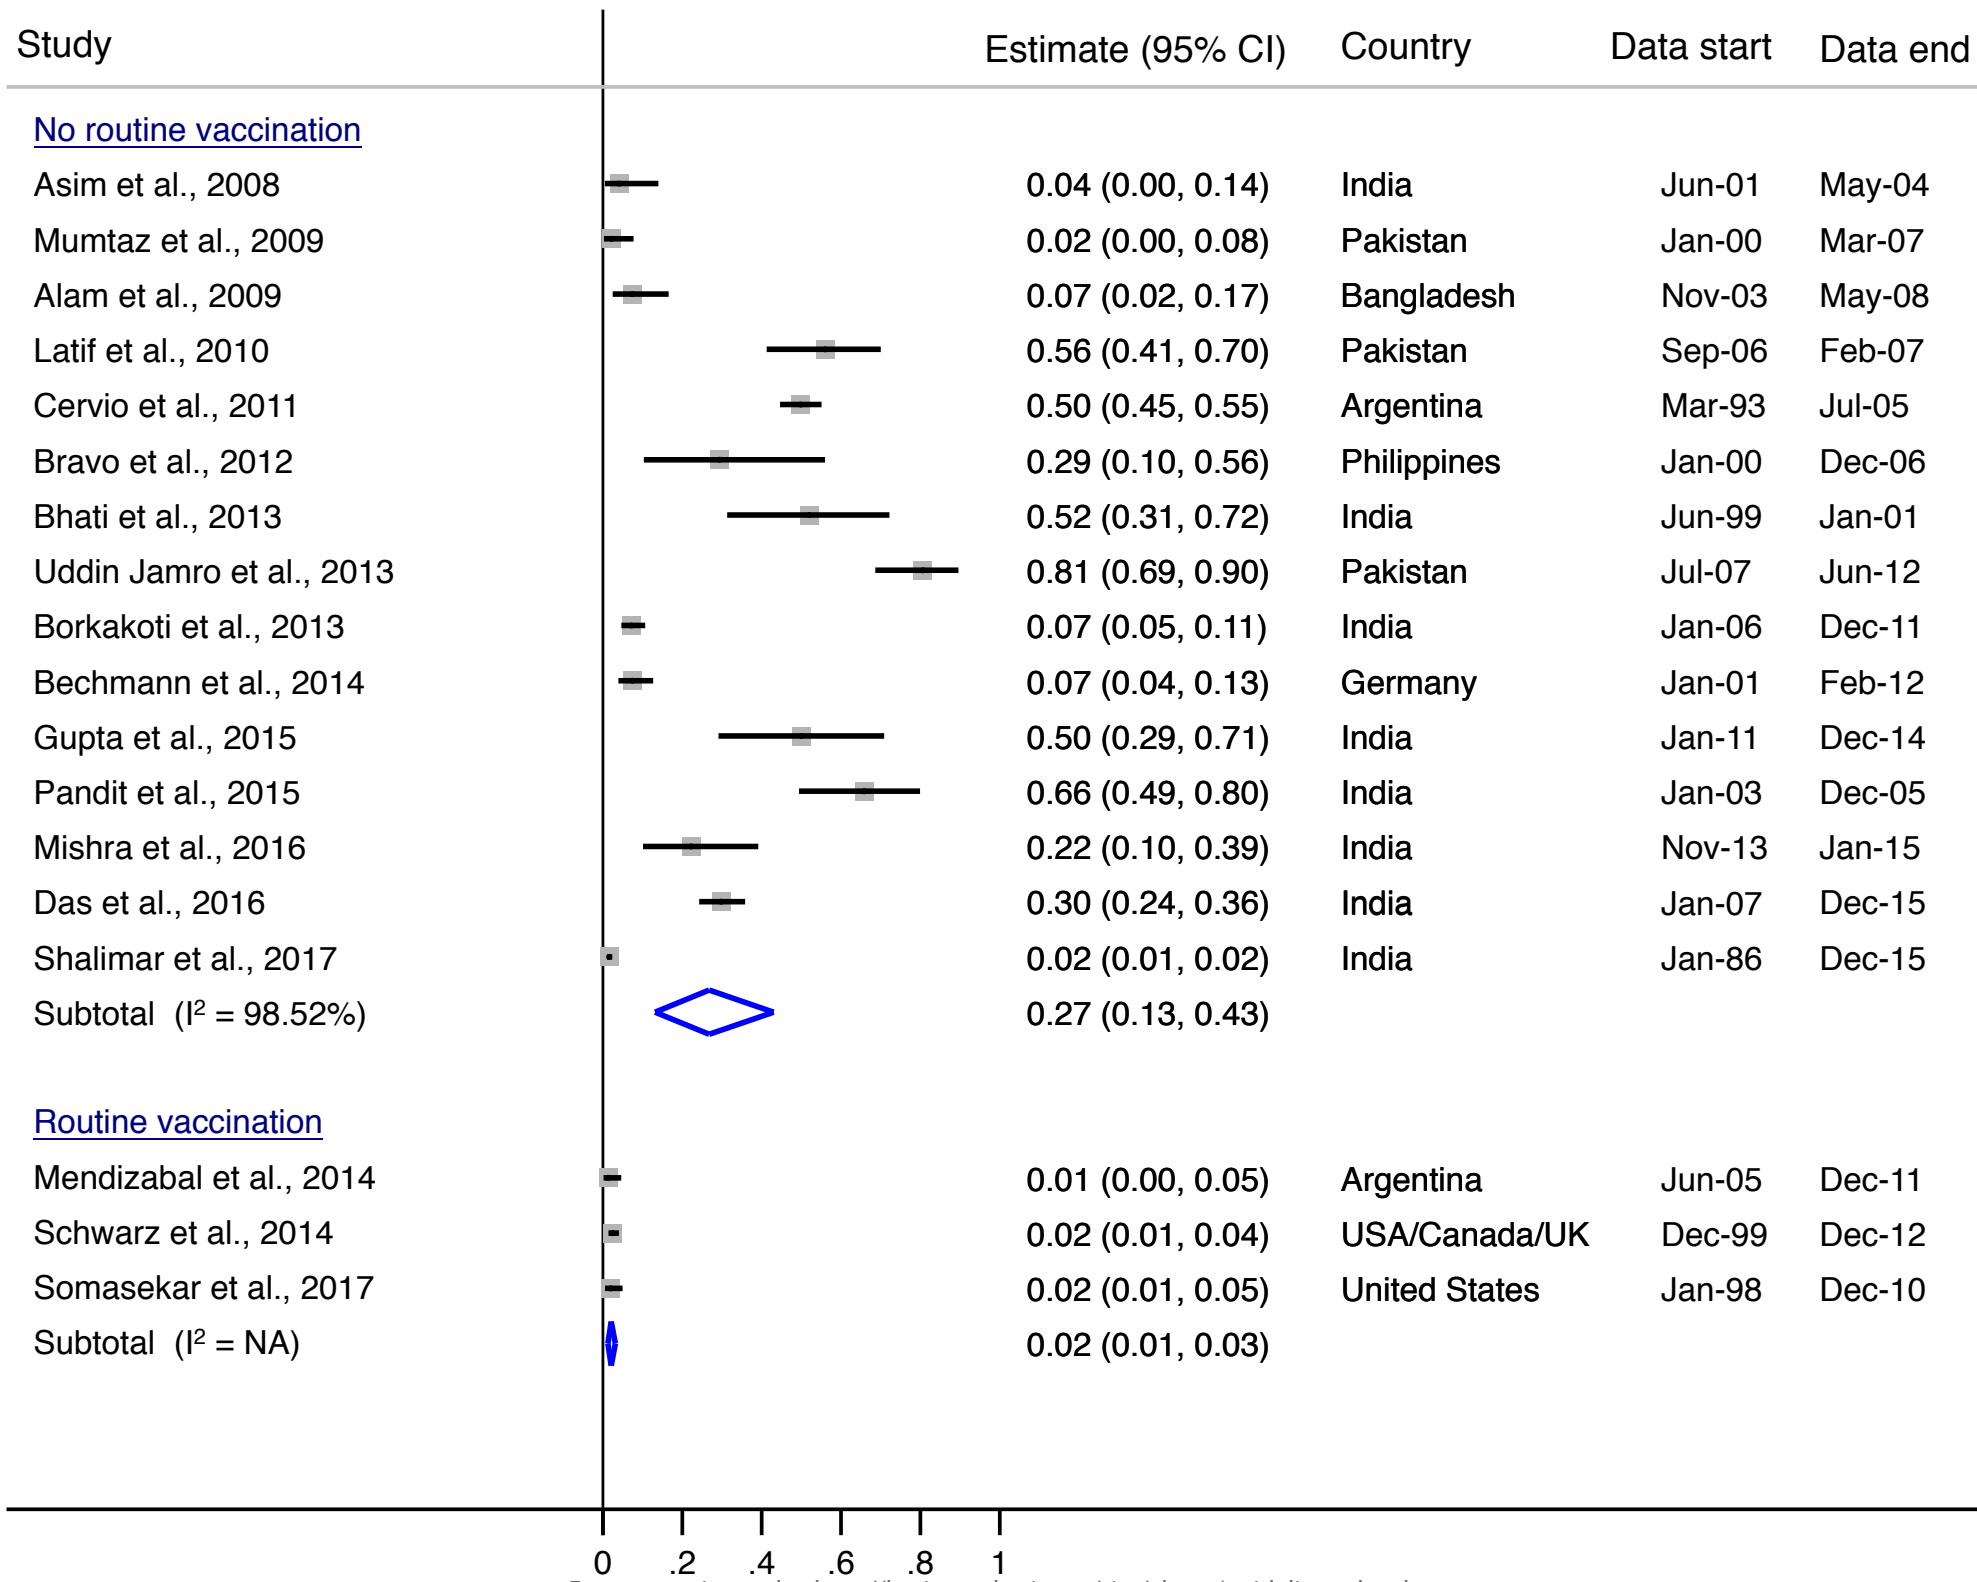

Figure 3: Prevalence of HBV-induced ALF by country HBV immunization status

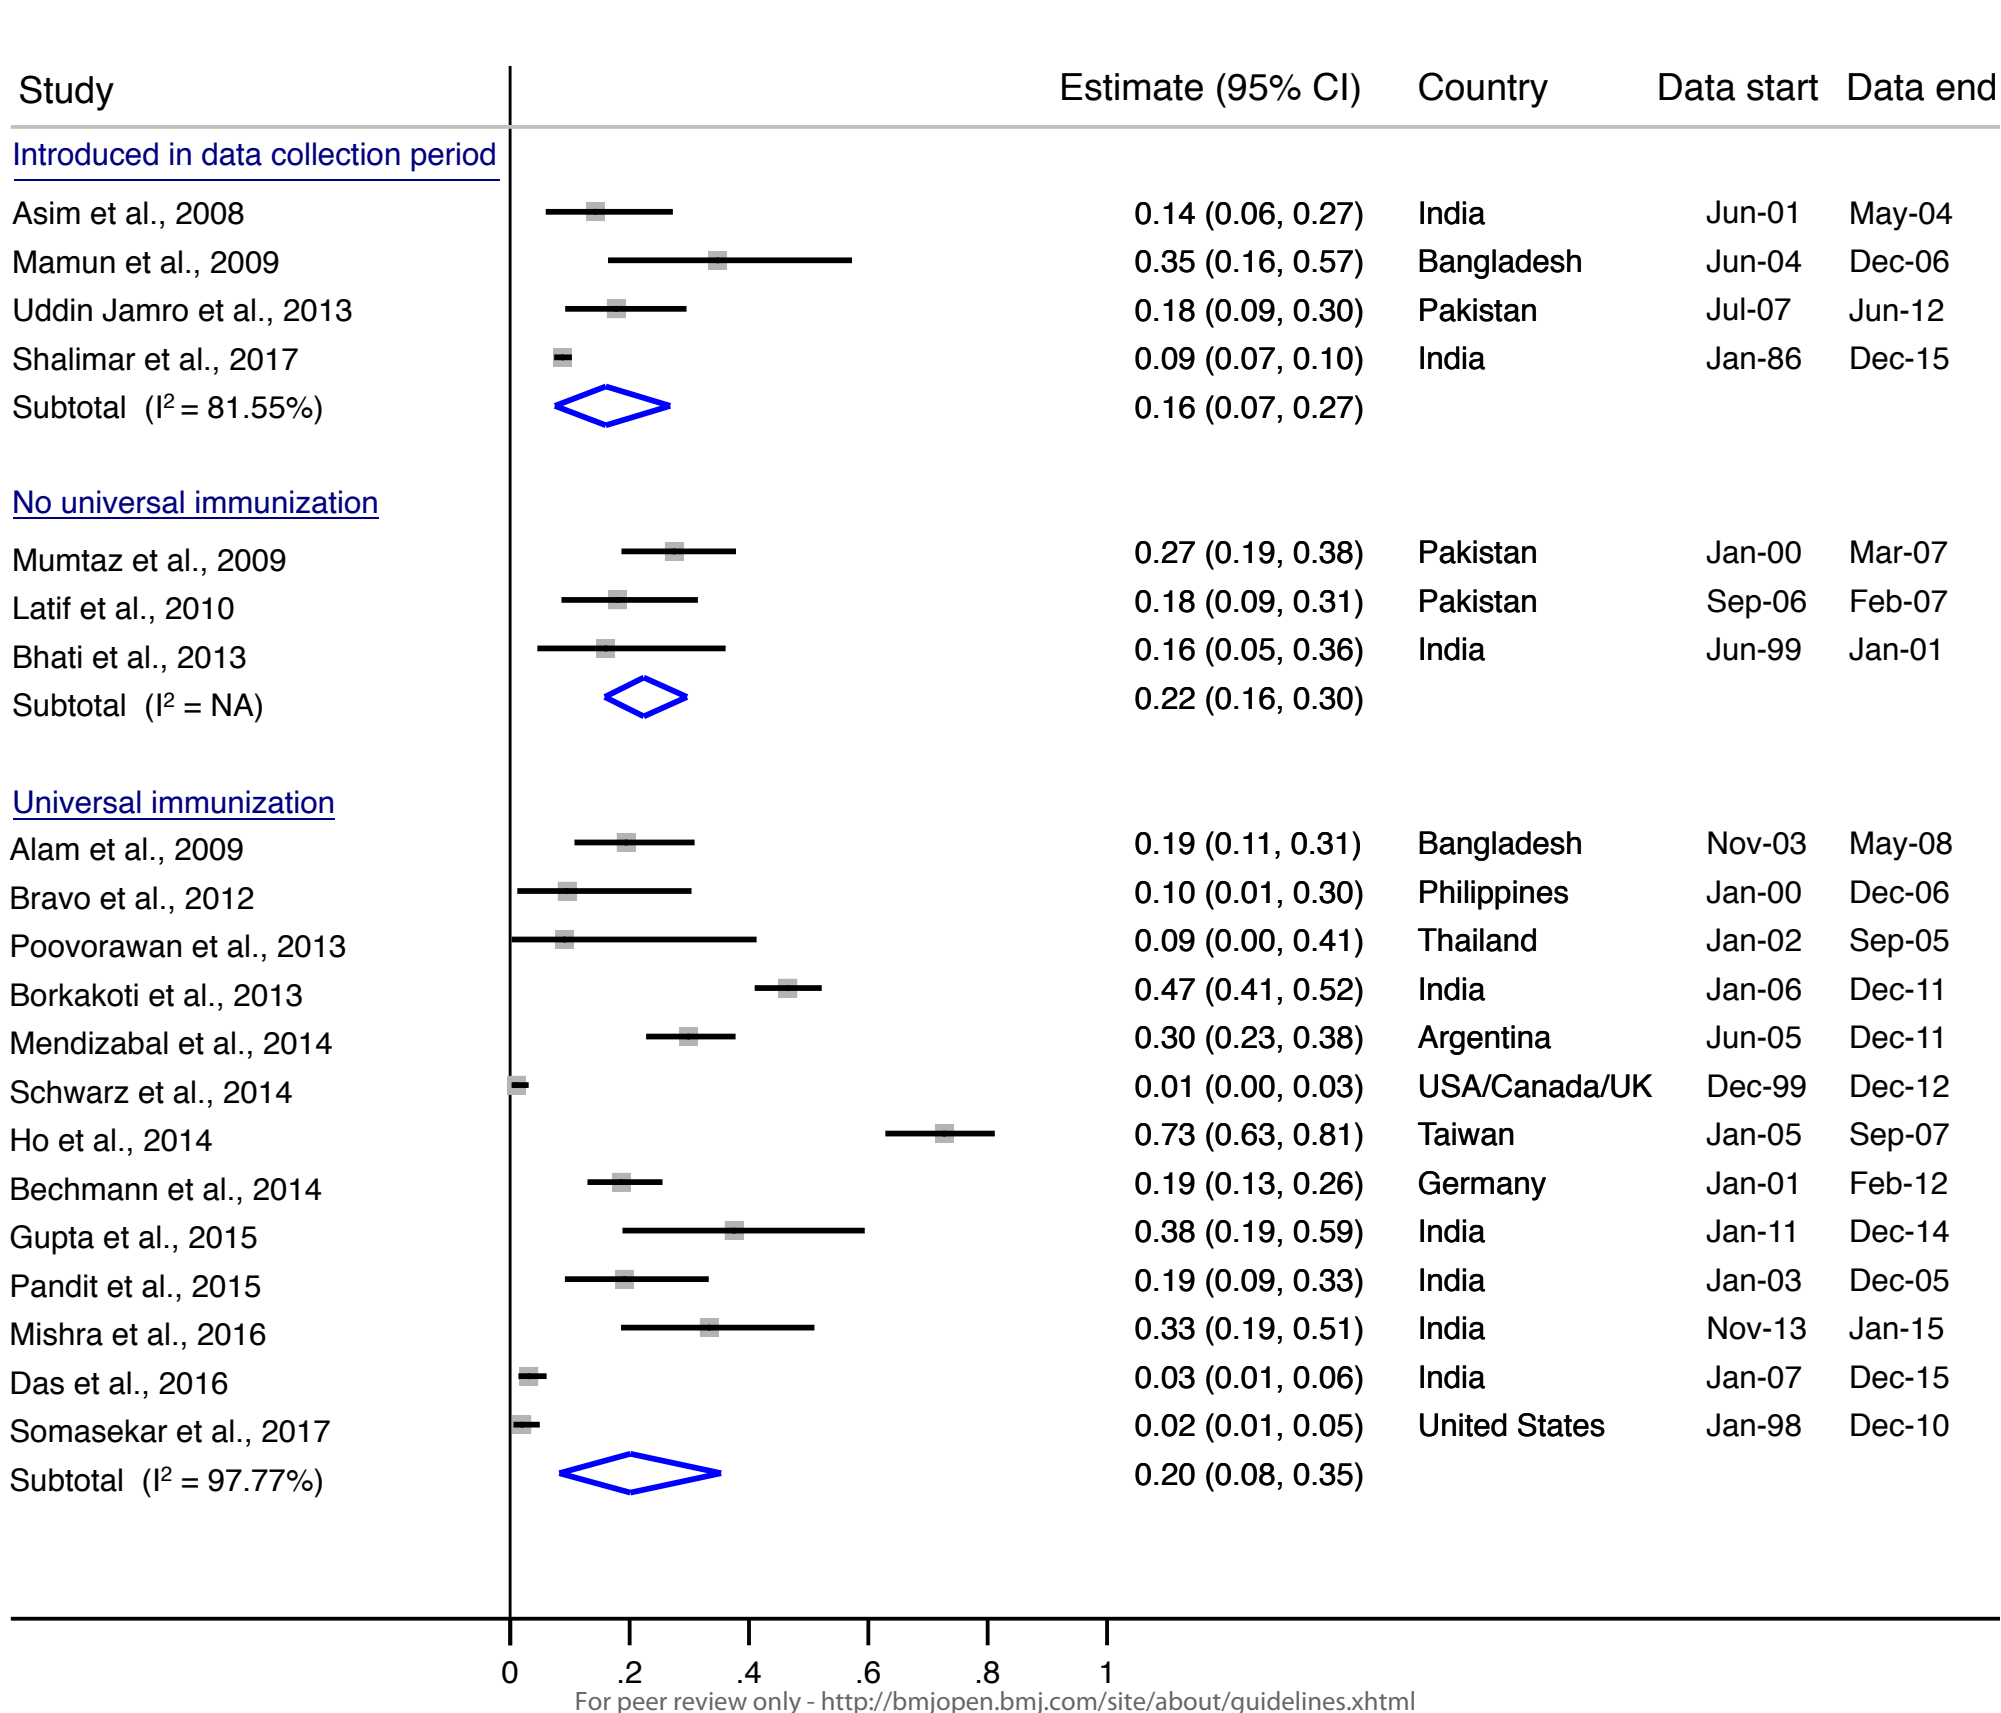

Figure 4: Prevalence of outcomes associated with viral-induced ALF



# Supplementary Figure 1: Prevalence of HCV-induced ALF

1  
2  
3  
4  
5  
6  
7  
8  
9  
10  
11  
12  
13  
14  
15  
16  
17  
18  
19  
20  
21  
22  
23  
24  
25  
26  
27  
28  
29  
30  
31  
32  
33  
34  
35  
36  
37  
38



For peer review only - <http://bmjopen.bmj.com/site/about/guidelines.xhtml>

Abbreviations: HCV = hepatitis C virus, ALF = acute liver failure, CI = confidence interval, I<sup>2</sup> = heterogeneity statistic

# Supplementary Figure 2: Prevalence of HEV-induced ALF

1  
2  
3  
4  
5  
6  
7  
8  
9  
10  
11  
12  
13  
14  
15  
16  
17  
18  
19  
20  
21  
22  
23  
24  
25  
26  
27  
28  
29  
30  
31  
32  
33  
34  
35  
36  
37  
38  
39  
40  
41  
42



For peer review only - <http://bmjopen.bmj.com/site/about/guidelines.xhtml>

Abbreviations: HEV = hepatitis E virus, ALF = acute liver failure, CI = confidence interval, I<sup>2</sup> = heterogeneity statistic

# Supplementary Figure 3: Prevalence of HDV-, HHV/HSV-, CMV- and EBV-induced AFL



For peer review only - <http://bmjopen.bmj.com/site/about/guidelines.xhtml>

Abbreviations: HDV = hepatitis D virus, HHV/HSV = Human Herpes virus/Herpes Simplex Virus, CMV = Cytomegalovirus, EBV = Epstein-Barr virus,

## SUPPLEMENTARY TABLE

| Supplementary Table 1: Risk of bias judgements for included studies |                                                            |                                                   |                                              |                                                                  |                                                               |                                          |                          |                                              |                           |                                                               |       |
|---------------------------------------------------------------------|------------------------------------------------------------|---------------------------------------------------|----------------------------------------------|------------------------------------------------------------------|---------------------------------------------------------------|------------------------------------------|--------------------------|----------------------------------------------|---------------------------|---------------------------------------------------------------|-------|
| Study ID                                                            | Represent<br>ation of<br>the<br>national<br>populatio<br>n | Represent<br>ation of<br>target<br>populatio<br>n | Rand<br>om<br>select<br>ion or<br>censu<br>s | Minim<br>al<br>likelih<br>ood of<br>non-<br>respon<br>se<br>bias | Data<br>collecte<br>d<br>directly<br>from<br>particip<br>ants | Accept<br>able<br>case<br>definiti<br>on | Valid<br>measure<br>ment | Same<br>mode<br>of<br>data<br>collect<br>ion | Appropri<br>ate<br>length | Appropri<br>ate<br>numerator<br>(s) and<br>denomina<br>tor(s) | Score |
| Alam et al., 2009                                                   | No                                                         | Yes                                               | No                                           | Yes                                                              | Yes                                                           | Yes                                      | Yes                      | Yes                                          | Yes                       | Yes                                                           | 8     |
| Asim et al., 2009                                                   | Yes                                                        | Yes                                               | No                                           | Yes                                                              | Yes                                                           | Yes                                      | Yes                      | Yes                                          | Yes                       | Yes                                                           | 9     |
| Bechmann et al., 2014                                               | Yes                                                        | Yes                                               | Yes                                          | Yes                                                              | Yes                                                           | Yes                                      | Yes                      | Yes                                          | Yes                       | Yes                                                           | 10    |
| Bhati et al., 2013                                                  | Yes                                                        | No                                                | No                                           | Yes                                                              | Yes                                                           | Yes                                      | Yes                      | Yes                                          | Yes                       | Yes                                                           | 8     |
| Borkakoti et al., 2013                                              | No                                                         | Yes                                               | No                                           | Yes                                                              | Yes                                                           | Yes                                      | Yes                      | Yes                                          | Yes                       | Yes                                                           | 8     |
| Bravo et al., 2012                                                  | No                                                         | No                                                | Yes                                          | Yes                                                              | Yes                                                           | Yes                                      | Yes                      | Yes                                          | Yes                       | Yes                                                           | 8     |
| Cervio et al., 2011                                                 | No                                                         | Yes                                               | Yes                                          | Yes                                                              | Yes                                                           | Yes                                      | Yes                      | Yes                                          | Yes                       | Yes                                                           | 9     |
| Das et al., 2016                                                    | Yes                                                        | Yes                                               | No                                           | Yes                                                              | Yes                                                           | Yes                                      | Yes                      | Yes                                          | Yes                       | Yes                                                           | 9     |
| Gupta et al., 2015                                                  | Yes                                                        | Yes                                               | Yes                                          | Yes                                                              | Yes                                                           | Yes                                      | Yes                      | Yes                                          | Yes                       | Yes                                                           | 10    |
| Ho et al., 2014                                                     | Yes                                                        | Yes                                               | Yes                                          | Yes                                                              | Yes                                                           | Yes                                      | Yes                      | Yes                                          | Yes                       | Yes                                                           | 10    |
| Latif et al., 2010                                                  | No                                                         | Yes                                               | No                                           | Yes                                                              | Yes                                                           | Yes                                      | Yes                      | Yes                                          | Yes                       | Yes                                                           | 9     |
| Mamun et al., 2009                                                  | No                                                         | Yes                                               | No                                           | No                                                               | Yes                                                           | Yes                                      | Yes                      | Yes                                          | Yes                       | Yes                                                           | 9     |
| Manka et al., 2015                                                  | No                                                         | Yes                                               | Yes                                          | No                                                               | Yes                                                           | Yes                                      | No                       | Yes                                          | Yes                       | Yes                                                           | 8     |
| Mendizabal et al., 2014                                             | No                                                         | Yes                                               | Yes                                          | No                                                               | Yes                                                           | Yes                                      | Yes                      | Yes                                          | Yes                       | Yes                                                           | 8     |
| Mishra et al., 2016                                                 | No                                                         | Yes                                               | No                                           | No                                                               | Yes                                                           | Yes                                      | Yes                      | Yes                                          | Yes                       | Yes                                                           | 7     |
| Mumtaz et al., 2009                                                 | Yes                                                        | Yes                                               | Yes                                          | Yes                                                              | Yes                                                           | Yes                                      | Yes                      | Yes                                          | Yes                       | Yes                                                           | 10    |
| Pandit et al., 2015                                                 | No                                                         | Yes                                               | No                                           | No                                                               | Yes                                                           | Yes                                      | Yes                      | Yes                                          | Yes                       | Yes                                                           | 8     |
| Poovorawan et al., 2013                                             | Yes                                                        | Yes                                               | Yes                                          | Yes                                                              | Yes                                                           | Yes                                      | Yes                      | Yes                                          | Yes                       | No                                                            | 9     |
| Schwarz et al., 2014                                                | Yes                                                        | Yes                                               | Yes                                          | Yes                                                              | Yes                                                           | Yes                                      | Yes                      | Yes                                          | Yes                       | No                                                            | 9     |
| Shalimar et al., 2017                                               | Yes                                                        | Yes                                               | Yes                                          | Yes                                                              | Yes                                                           | Yes                                      | Yes                      | Yes                                          | Yes                       | Yes                                                           | 10    |
| Silverio et al., 2015                                               | Yes                                                        | Yes                                               | Yes                                          | Yes                                                              | Yes                                                           | Yes                                      | Yes                      | Yes                                          | Yes                       | Yes                                                           | 10    |
| Somasekar et al., 2017                                              | Yes                                                        | Yes                                               | No                                           | No                                                               | Yes                                                           | Yes                                      | Yes                      | Yes                                          | Yes                       | Yes                                                           | 8     |

|                                |     |     |     |     |     |     |     |     |     |     |     |    |
|--------------------------------|-----|-----|-----|-----|-----|-----|-----|-----|-----|-----|-----|----|
| Uddin<br>Jamro et<br>al., 2013 | Yes | 10 |
| Tsunoda et<br>al., 2017        | Yes | Yes | Yes | No  | Yes | 9  |
| Zhao et al.,<br>2014           | Yes | Yes | No  | No  | Yes | 8  |

For peer review only



The PRISMA for Abstracts Checklist

| TITLE                                     | CHECKLIST ITEM                                                                                                                                                                                       | REPORTED ON PAGE # |
|-------------------------------------------|------------------------------------------------------------------------------------------------------------------------------------------------------------------------------------------------------|--------------------|
| 1. Title:                                 | Identify the report as a systematic review, meta-analysis, or both.                                                                                                                                  | 1                  |
| <b>BACKGROUND</b>                         |                                                                                                                                                                                                      |                    |
| 2. Objectives:                            | The research question including components such as participants, interventions, comparators, and outcomes.                                                                                           | 1                  |
| <b>METHODS</b>                            |                                                                                                                                                                                                      |                    |
| 3. Eligibility criteria:                  | Study and report characteristics used as criteria for inclusion.                                                                                                                                     | 1                  |
| 4. Information sources:                   | Key databases searched and search dates.                                                                                                                                                             | 1                  |
| 5. Risk of bias:                          | Methods of assessing risk of bias.                                                                                                                                                                   | 1                  |
| <b>RESULTS</b>                            |                                                                                                                                                                                                      |                    |
| 6. Included studies:                      | Number and type of included studies and participants and relevant characteristics of studies.                                                                                                        | 1                  |
| 7. Synthesis of results:                  | Results for main outcomes (benefits and harms), preferably indicating the number of studies and participants for each. If meta-analysis was done, include summary measures and confidence intervals. | 1                  |
| 8. Description of the effect:             | Direction of the effect (i.e. which group is favoured) and size of the effect in terms meaningful to clinicians and patients.                                                                        | 1                  |
| <b>DISCUSSION</b>                         |                                                                                                                                                                                                      |                    |
| 9. Strengths and Limitations of evidence: | Brief summary of strengths and limitations of evidence (e.g. inconsistency, imprecision, indirectness, or risk of bias, other supporting or conflicting evidence)                                    | 1                  |
| 10. Interpretation:                       | General interpretation of the results and important implications                                                                                                                                     | 1                  |
| <b>OTHER</b>                              |                                                                                                                                                                                                      |                    |
| 11. Funding:                              | Primary source of funding for the review.                                                                                                                                                            | 1                  |
| 12. Registration:                         | Registration number and registry name.                                                                                                                                                               | 1                  |

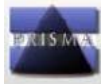

# PRISMA 2009 Checklist

| Section/topic                      | #  | Checklist item                                                                                                                                                                                                                                                                                              | Reported on page # |
|------------------------------------|----|-------------------------------------------------------------------------------------------------------------------------------------------------------------------------------------------------------------------------------------------------------------------------------------------------------------|--------------------|
| <b>TITLE</b>                       |    |                                                                                                                                                                                                                                                                                                             |                    |
| Title                              | 1  | Identify the report as a systematic review, meta-analysis, or both.                                                                                                                                                                                                                                         | Title Page         |
| <b>ABSTRACT</b>                    |    |                                                                                                                                                                                                                                                                                                             |                    |
| Structured summary                 | 2  | Provide a structured summary including, as applicable: background; objectives; data sources; study eligibility criteria, participants, and interventions; study appraisal and synthesis methods; results; limitations; conclusions and implications of key findings; systematic review registration number. | 1                  |
| <b>INTRODUCTION</b>                |    |                                                                                                                                                                                                                                                                                                             |                    |
| Rationale                          | 3  | Describe the rationale for the review in the context of what is already known.                                                                                                                                                                                                                              | 2                  |
| Objectives                         | 4  | Provide an explicit statement of questions being addressed with reference to participants, interventions, comparisons, outcomes, and study design (PICOS).                                                                                                                                                  | 2-3                |
| <b>METHODS</b>                     |    |                                                                                                                                                                                                                                                                                                             |                    |
| Protocol and registration          | 5  | Indicate if a review protocol exists, if and where it can be accessed (e.g., Web address), and, if available, provide registration information including registration number.                                                                                                                               | 3                  |
| Eligibility criteria               | 6  | Specify study characteristics (e.g., PICOS, length of follow-up) and report characteristics (e.g., years considered, language, publication status) used as criteria for eligibility, giving rationale.                                                                                                      | 3                  |
| Information sources                | 7  | Describe all information sources (e.g., databases with dates of coverage, contact with study authors to identify additional studies) in the search and date last searched.                                                                                                                                  | 3                  |
| Search                             | 8  | Present full electronic search strategy for at least one database, including any limits used, such that it could be repeated.                                                                                                                                                                               | 3                  |
| Study selection                    | 9  | State the process for selecting studies (i.e., screening, eligibility, included in systematic review, and, if applicable, included in the meta-analysis).                                                                                                                                                   | 3-4                |
| Data collection process            | 10 | Describe method of data extraction from reports (e.g., piloted forms, independently, in duplicate) and any processes for obtaining and confirming data from investigators.                                                                                                                                  | 4                  |
| Data items                         | 11 | List and define all variables for which data were sought (e.g., PICOS, funding sources) and any assumptions and simplifications made.                                                                                                                                                                       | 4                  |
| Risk of bias in individual studies | 12 | Describe methods used for assessing risk of bias of individual studies (including specification of whether this was done at the study or outcome level), and how this information is to be used in any data synthesis.                                                                                      | 4-5                |
| Summary measures                   | 13 | State the principal summary measures (e.g., risk ratio, difference in means).                                                                                                                                                                                                                               | 4                  |

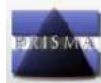

# PRISMA 2009 Checklist

Page 1 of 2

| Synthesis of results          | 14 | Describe the methods of handling data and combining results of studies, if done, including measures of consistency (e.g., $I^2$ ) for each meta-analysis.                                                | 4                  |
|-------------------------------|----|----------------------------------------------------------------------------------------------------------------------------------------------------------------------------------------------------------|--------------------|
| Page 1 of 2                   |    |                                                                                                                                                                                                          |                    |
| Section/topic                 | #  | Checklist item                                                                                                                                                                                           | Reported on page # |
| Risk of bias across studies   | 15 | Specify any assessment of risk of bias that may affect the cumulative evidence (e.g., publication bias, selective reporting within studies).                                                             | 4-5                |
| Additional analyses           | 16 | Describe methods of additional analyses (e.g., sensitivity or subgroup analyses, meta-regression), if done, indicating which were pre-specified.                                                         | 4                  |
| <b>RESULTS</b>                |    |                                                                                                                                                                                                          |                    |
| Study selection               | 17 | Give numbers of studies screened, assessed for eligibility, and included in the review, with reasons for exclusions at each stage, ideally with a flow diagram.                                          | 5                  |
| Study characteristics         | 18 | For each study, present characteristics for which data were extracted (e.g., study size, PICOS, follow-up period) and provide the citations.                                                             | 5                  |
| Risk of bias within studies   | 19 | Present data on risk of bias of each study and, if available, any outcome level assessment (see item 12).                                                                                                | 6                  |
| Results of individual studies | 20 | For all outcomes considered (benefits or harms), present, for each study: (a) simple summary data for each intervention group (b) effect estimates and confidence intervals, ideally with a forest plot. | 5-6                |
| Synthesis of results          | 21 | Present results of each meta-analysis done, including confidence intervals and measures of consistency.                                                                                                  | 5-6                |
| Risk of bias across studies   | 22 | Present results of any assessment of risk of bias across studies (see Item 15).                                                                                                                          | 6                  |
| Additional analysis           | 23 | Give results of additional analyses, if done (e.g., sensitivity or subgroup analyses, meta-regression [see Item 16]).                                                                                    | 5-6                |
| <b>DISCUSSION</b>             |    |                                                                                                                                                                                                          |                    |
| Summary of evidence           | 24 | Summarize the main findings including the strength of evidence for each main outcome; consider their relevance to key groups (e.g., healthcare providers, users, and policy makers).                     | 6-8                |
| Limitations                   | 25 | Discuss limitations at study and outcome level (e.g., risk of bias), and at review-level (e.g., incomplete retrieval of identified research, reporting bias).                                            | 8                  |
| Conclusions                   | 26 | Provide a general interpretation of the results in the context of other evidence, and implications for future research.                                                                                  | 9                  |
| <b>FUNDING</b>                |    |                                                                                                                                                                                                          |                    |
| Funding                       | 27 | Describe sources of funding for the systematic review and other support (e.g., supply of data); role of funders for the systematic review.                                                               | 10                 |

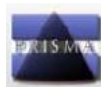

# PRISMA 2009 Checklist

For more information, visit: [www.prisma-statement.org](http://www.prisma-statement.org).

Page 2 of 2

For peer review only

1  
2  
3  
4  
5  
6  
7  
8  
9  
10  
11  
12  
13  
14  
15  
16  
17  
18  
19  
20  
21  
22  
23  
24  
25  
26  
27  
28  
29  
30  
31  
32  
33  
34  
35  
36  
37  
38  
39  
40  
41  
42  
43  
44  
45  
46  
47
