# Supplementary material for: Systematic review of the global epidemiology of viral-induced acute liver failure
Source: PubMed Central journal article supplement — BMJ Open. 2020 Jul 20;10(7):e037473. doi: 10.1136/bmjopen-2020-037473 (PMC7375632; doi:10.1136/bmjopen-2020-037473), 2020-07-20
Supplement: bmjopen-2020-037473supp002.pdf [file bmjopen-2020-037473supp002.pdf]

## Supplementary Figure 2: Prevalence of HEV-induced ALF

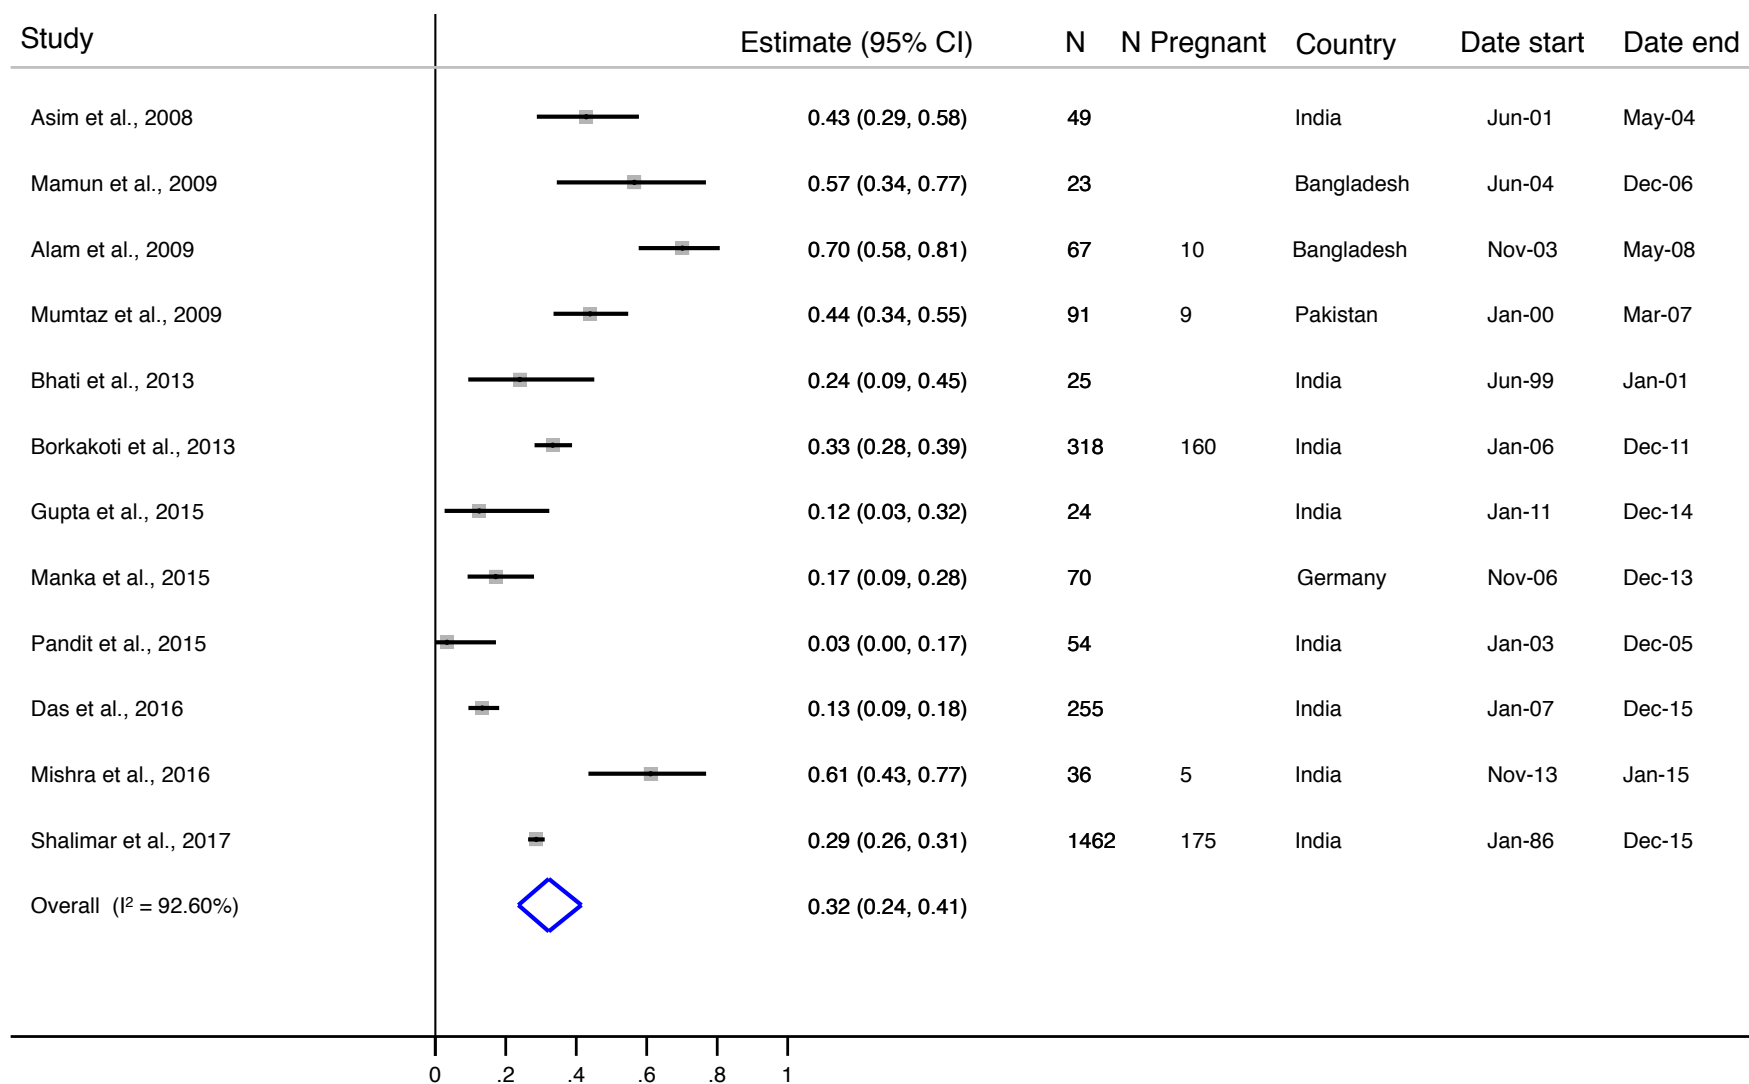

Abbreviations: HEV = hepatitis E virus, ALF = acute liver failure, CI = confidence interval,  $I^2$  = heterogeneity statistic
