# Supplementary material for: Systematic review of the global epidemiology of viral-induced acute liver failure
Source: PubMed Central journal article supplement — BMJ Open. 2020 Jul 20;10(7):e037473. doi: 10.1136/bmjopen-2020-037473 (PMC7375632; doi:10.1136/bmjopen-2020-037473), 2020-07-20
Supplement: bmjopen-2020-037473supp003.pdf [file bmjopen-2020-037473supp003.pdf]

## Supplementary Figure 3: Prevalence of HDV-, HHV/HSV-, CMV- and EBV-induced AFL

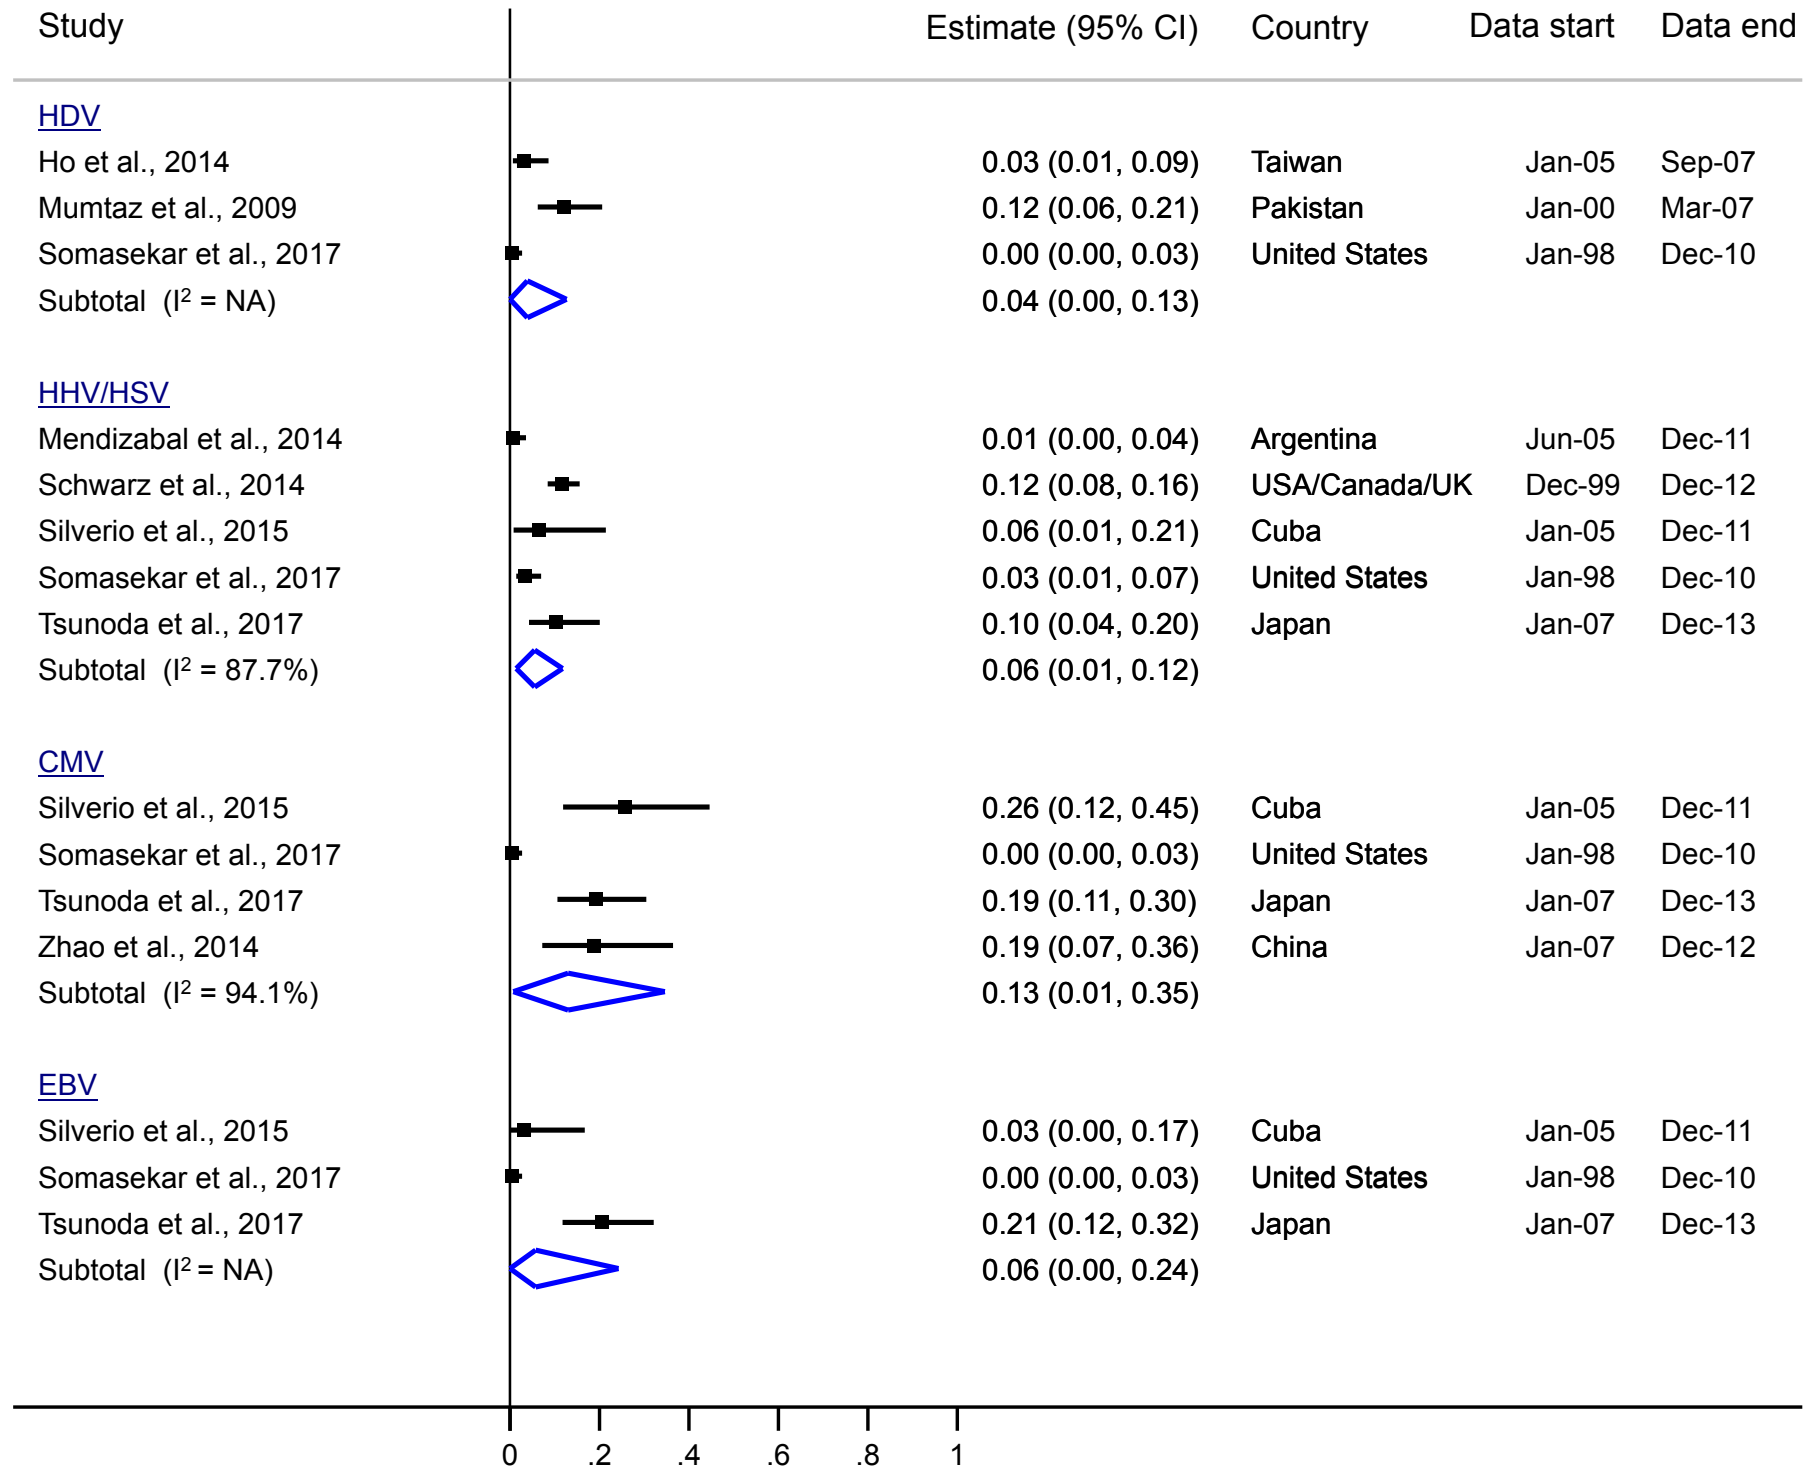

Abbreviations: HDV = hepatitis D virus, HHV/HSV = Human Herpes virus/Herpes Simplex Virus, CMV = Cytomegalovirus, EBV = Epstein-Barr virus,
