# Supplementary material for: Systematic review of the global epidemiology of viral-induced acute liver failure
Source: PubMed Central journal article supplement — BMJ Open. 2020 Jul 20;10(7):e037473. doi: 10.1136/bmjopen-2020-037473 (PMC7375632; doi:10.1136/bmjopen-2020-037473), 2020-07-20
Supplement: bmjopen-2020-037473supp004.pdf [file bmjopen-2020-037473supp004.pdf]

## SUPPLEMENTARY TABLE

| Supplementary Table 1: Risk of bias judgements for included studies |                                                            |                                                   |                                              |                                                                  |                                                               |                                          |                          |                                              |                           |                                                               |       |
|---------------------------------------------------------------------|------------------------------------------------------------|---------------------------------------------------|----------------------------------------------|------------------------------------------------------------------|---------------------------------------------------------------|------------------------------------------|--------------------------|----------------------------------------------|---------------------------|---------------------------------------------------------------|-------|
| Study ID                                                            | Represent<br>ation of<br>the<br>national<br>populatio<br>n | Represent<br>ation of<br>target<br>populatio<br>n | Rand<br>om<br>select<br>ion or<br>censu<br>s | Minim<br>al<br>likelih<br>ood of<br>non-<br>respon<br>se<br>bias | Data<br>colle<br>cted<br>directly<br>from<br>particip<br>ants | Accept<br>able<br>case<br>definiti<br>on | Valid<br>measure<br>ment | Same<br>mode<br>of<br>data<br>collect<br>ion | Approp<br>riate<br>length | Approp<br>riate<br>numerator<br>(s) and<br>denomina<br>tor(s) | Score |
| Alam et al., 2009                                                   | No                                                         | Yes                                               | No                                           | Yes                                                              | Yes                                                           | Yes                                      | Yes                      | Yes                                          | Yes                       | Yes                                                           | 8     |
| Asim et al., 2009                                                   | Yes                                                        | Yes                                               | No                                           | Yes                                                              | Yes                                                           | Yes                                      | Yes                      | Yes                                          | Yes                       | Yes                                                           | 9     |
| Bechmann et al., 2014                                               | Yes                                                        | Yes                                               | Yes                                          | Yes                                                              | Yes                                                           | Yes                                      | Yes                      | Yes                                          | Yes                       | Yes                                                           | 10    |
| Bhati et al., 2013                                                  | Yes                                                        | No                                                | No                                           | Yes                                                              | Yes                                                           | Yes                                      | Yes                      | Yes                                          | Yes                       | Yes                                                           | 8     |
| Borkakoti et al., 2013                                              | No                                                         | Yes                                               | No                                           | Yes                                                              | Yes                                                           | Yes                                      | Yes                      | Yes                                          | Yes                       | Yes                                                           | 8     |
| Bravo et al., 2012                                                  | No                                                         | No                                                | Yes                                          | Yes                                                              | Yes                                                           | Yes                                      | Yes                      | Yes                                          | Yes                       | Yes                                                           | 8     |
| Cervio et al., 2011                                                 | No                                                         | Yes                                               | Yes                                          | Yes                                                              | Yes                                                           | Yes                                      | Yes                      | Yes                                          | Yes                       | Yes                                                           | 9     |
| Das et al., 2016                                                    | Yes                                                        | Yes                                               | No                                           | Yes                                                              | Yes                                                           | Yes                                      | Yes                      | Yes                                          | Yes                       | Yes                                                           | 9     |
| Gupta et al., 2015                                                  | Yes                                                        | Yes                                               | Yes                                          | Yes                                                              | Yes                                                           | Yes                                      | Yes                      | Yes                                          | Yes                       | Yes                                                           | 10    |
| Ho et al., 2014                                                     | Yes                                                        | Yes                                               | Yes                                          | Yes                                                              | Yes                                                           | Yes                                      | Yes                      | Yes                                          | Yes                       | Yes                                                           | 10    |
| Latif et al., 2010                                                  | No                                                         | Yes                                               | No                                           | Yes                                                              | Yes                                                           | Yes                                      | Yes                      | Yes                                          | Yes                       | Yes                                                           | 9     |
| Mamun et al., 2009                                                  | No                                                         | Yes                                               | No                                           | No                                                               | Yes                                                           | Yes                                      | Yes                      | Yes                                          | Yes                       | Yes                                                           | 9     |
| Manka et al., 2015                                                  | No                                                         | Yes                                               | Yes                                          | No                                                               | Yes                                                           | Yes                                      | No                       | Yes                                          | Yes                       | Yes                                                           | 8     |
| Mendizabal et al., 2014                                             | No                                                         | Yes                                               | Yes                                          | No                                                               | Yes                                                           | Yes                                      | Yes                      | Yes                                          | Yes                       | Yes                                                           | 8     |
| Mishra et al., 2016                                                 | No                                                         | Yes                                               | No                                           | No                                                               | Yes                                                           | Yes                                      | Yes                      | Yes                                          | Yes                       | Yes                                                           | 7     |
| Mumtaz et al., 2009                                                 | Yes                                                        | Yes                                               | Yes                                          | Yes                                                              | Yes                                                           | Yes                                      | Yes                      | Yes                                          | Yes                       | Yes                                                           | 10    |
| Pandit et al., 2015                                                 | No                                                         | Yes                                               | No                                           | No                                                               | Yes                                                           | Yes                                      | Yes                      | Yes                                          | Yes                       | Yes                                                           | 8     |
| Poovorawan et al., 2013                                             | Yes                                                        | Yes                                               | Yes                                          | Yes                                                              | Yes                                                           | Yes                                      | Yes                      | Yes                                          | Yes                       | No                                                            | 9     |
| Schwarz et al., 2014                                                | Yes                                                        | Yes                                               | Yes                                          | Yes                                                              | Yes                                                           | Yes                                      | Yes                      | Yes                                          | Yes                       | No                                                            | 9     |
| Shalimar et al., 2017                                               | Yes                                                        | Yes                                               | Yes                                          | Yes                                                              | Yes                                                           | Yes                                      | Yes                      | Yes                                          | Yes                       | Yes                                                           | 10    |
| Silverio et al., 2015                                               | Yes                                                        | Yes                                               | Yes                                          | Yes                                                              | Yes                                                           | Yes                                      | Yes                      | Yes                                          | Yes                       | Yes                                                           | 10    |
| Somasekar et al., 2017                                              | Yes                                                        | Yes                                               | No                                           | No                                                               | Yes                                                           | Yes                                      | Yes                      | Yes                                          | Yes                       | Yes                                                           | 8     |

|                                |     |     |     |     |     |     |     |     |     |     |    |
|--------------------------------|-----|-----|-----|-----|-----|-----|-----|-----|-----|-----|----|
| Uddin<br>Jamro et<br>al., 2013 | Yes | 10 |
| Tsunoda et<br>al., 2017        | Yes | Yes | Yes | No  | Yes | Yes | Yes | Yes | Yes | Yes | 9  |
| Zhao et al.,<br>2014           | Yes | Yes | No  | No  | Yes | Yes | Yes | Yes | Yes | Yes | 8  |
